# Supplementary material
Source: PubMed Central journal article supplement (PMC3816403)
Supplement: 1218851110_sapp.pdf [file 1218851110_sapp.pdf]

1 **Supplementary Materials for:**

2  
3 **Pathways for Neoproterozoic pyrite formation constrained by mass-independent sulfur**

4 **isotopes**

5 *James Farquhar<sup>1,2</sup>, John Cliff<sup>2</sup>, Aubrey L. Zerkle<sup>3</sup>, Alexey Kamyshev<sup>4</sup>, Simon W. Poulton<sup>5</sup>,*  
6 *Mark Claire<sup>6</sup>, David Adams<sup>2</sup>, Brian Harms<sup>1</sup>*

7  
8 <sup>1</sup> *Department of Geology and ESSIC, University of Maryland, College Park MD 20742 USA.*

9 <sup>2</sup> *Centre for Microscopy and Microanalysis, University of Western Australia, Perth,*  
10 *Australia.*

11 <sup>3</sup> *School of Civil Engineering and Geoscience, Newcastle University, Newcastle upon Tyne,*  
12 *NE1 7RU, UK.*

13 <sup>4</sup> *Department of Geological and Environmental Sciences, The Faculty of Natural Sciences,*  
14 *Ben-Gurion University of the Negev, P.O. Box 653, Beer Sheva 84105, Israel.*

15 <sup>5</sup> *School of Earth and Environment, University of Leeds, Leeds, LS2 9JT, UK.*

16 <sup>6</sup> *School of Environmental Sciences, University of East Anglia, Norwich Research Park,*  
17 *Norwich, NR4 7TJ, UK.*

18  
19  
20 **Analytical procedure**

21 **Sample preparation**

22 Samples were cut from core remnants using a diamond wafering saw and cast along with the  
23 in-house standard Son-3 in epoxy mounts. Samples were ground flat and polished to 1 µm  
24 before imaging and coating with 30 nm of gold.

25 **Sulfide S-isotope analysis**

26 **Analytical procedure**

27 Sulfur 4-isotope ratios (<sup>x</sup>S/<sup>32</sup>S) were determined using a Cameca IMS 1280 ion  
28 microprobe in multicollection mode at the Centre for Microscopy, Characterisation and

29 Analysis (CMCA) at the University of Western Australia. In all cases NMR regulation was  
30 used and  $^{32}\text{S}$ ,  $^{33}\text{S}$ , and  $^{34}\text{S}$  were measured using Faraday cup detectors (FC).  $^{36}\text{S}$  was measured  
31 using an electron multiplier (EM). Two different analytical conditions were used depending  
32 on the size of the sulfide target available. When sulfide grains were of sufficient size, a  
33 rastered beam approach was used. A 3.5 – 4 nA focused primary beam was used to  
34 presputter the analysis area using a  $30\ \mu\text{m} \times 30\ \mu\text{m}$  beam for 30 seconds followed by  
35 automated secondary centering in the field aperture (FA) and entrance slit (ES) and analysis  
36 using a  $20\ \mu\text{m} \times 20\ \mu\text{m}$  raster employing dynamic transfer for  $45 \times 4$  second integrations.  
37 This strategy optimized conditions for a stable signal for  $^{36}\text{S}$  on the EM, thus minimizing  
38 artifacts due to nonlinearity of the EM response at high count rates during the course of a  
39 single analysis. Unknowns were bracketed with standards of known composition. Other  
40 conditions include a  $133 \times$  magnification between sample stage and FA,  $70\ \mu\text{m}$  entrance slit,  
41  $4000\ \mu\text{m}$  FA,  $400\ \mu\text{m}$  contrast aperture, a 40 eV energy window with a 5 eV offset to the  
42 high energy side, and  $500\ \mu\text{m}$  exit slits. These conditions do not allow for complete  
43 resolution of the  $^{32}\text{SH}^-$  and  $^{33}\text{S}^-$  peaks. However, we employed the common method of  
44 offsetting the m/z 33 trolley to the low mass side. Abundance sensitivity under the analytical  
45 conditions presented here is sufficient to exclude tailing of the  $^{32}\text{SH}^-$  peak. For example, we  
46 have found that under these conditions, analyses of standard grains in a radius of 6 mm from  
47 the centre of the sample provide no evidence of degraded abundance sensitivity which would  
48 be exhibited as poor external precision of the  $^{33}\text{S}/^{32}\text{S}$  measurements and a positive  $\Delta^{33}\text{S}$   
49 signature ( $\delta^{33}\text{S}-\sigma_{\text{ext}} = 0.04\text{‰}$ ,  $\Delta^{33}\text{S} = 0.006 \pm 0.01\ \text{‰}$ ,  $1\sigma_{\text{ext}}$ ). Average external precision (1  
50 SD) for standard analyses were as follows  $\delta^{33}\text{S} = 0.05\text{‰}$ ,  $\delta^{34}\text{S} = 0.05\text{‰}$ ,  $\delta^{36}\text{S} = 0.15\text{‰}$ ,  $\Delta^{33}\text{S}$   
51  $= 0.03\text{‰}$ , and  $\Delta^{36}\text{S} = 0.13\text{‰}$ .

52 In many cases, targets were analyzed with length scales of between  $10\ \mu\text{m}$  and  $20\ \mu\text{m}$ .  
53 For these targets, a static  $\sim 10\ \mu\text{m}$  beam was used after presputtering. Because IMF changed

54 dramatically as a function of depth (see Table S1 below) IMF was calculated every 15 cycles.  
 55 Thus, each analysis consisted of 45× 4-second cycles but used a different IMF factors for  
 56 cycles 1-15, 16-30, and 31-45 and data reported here consist of the average of the IMF  
 57 corrected  $\delta$  values (or calculated  $\Delta$  values) and uncertainties are the  $SD_{\text{mean}}$  of the three values  
 58 for each analysis. Each analysis spot was pre-sputtered for 30 seconds with a raster of 10  $\mu\text{m}$   
 59 before a static beam was employed. Other analytical conditions were identical to that  
 60 employed with a rastered beam (see above). Regardless of whether a rastered or static beam  
 61 was used for analysis, a normal incidence electron gun was used for charge compensation.  
 62 Despite the fact that the analyses were performed with the Cameca automatic EM drift  
 63 correction module, drift correction was often needed for  $^{36}\text{S}$ . Average external precision for  
 64 standard analyses were as follows  $\delta^{33}\text{S} = 0.07\text{‰}$ ,  $\delta^{34}\text{S} = 0.11\text{‰}$ ,  $\delta^{36}\text{S} = 0.30\text{‰}$ ,  $\Delta^{33}\text{S} = 0.04\text{‰}$ ,  
 65 and  $\Delta^{36}\text{S} = 0.25\text{‰}$ .

66 **Table S1.** Representative IMF data for  $^{33}\text{S}/^{32}\text{S}$ ,  $^{34}\text{S}/^{32}\text{S}$ , and  $^{36}\text{S}/^{32}\text{S}$  for a single analysis  
 67 session using the static analysis beam approach. Individual  $\delta^x\text{S}$  values for each analysis were  
 68 obtained by averaging the values obtained using equation 4 with three different IMF values  
 69 for each third of the analysis.  
 70

| Anal.<br>cycle | $^{33}\text{S}/^{32}\text{S}$ |             | $^{34}\text{S}/^{32}\text{S}$ |          | $^{36}\text{S}/^{32}\text{S}$ |         |
|----------------|-------------------------------|-------------|-------------------------------|----------|-------------------------------|---------|
|                | IMF <sup>a</sup>              | $1\sigma^b$ | $1\sigma$                     |          | $1\sigma$                     |         |
| 1-15           | 1.001818                      | 0.000026    | 1.002405                      | 0.000037 | 0.975313                      | 0.00010 |
| 16-30          | 0.999882                      | 0.000030    | 0.998679                      | 0.000034 | 0.968699                      | 0.00011 |
| 31-45          | 0.997991                      | 0.000023    | 0.994973                      | 0.000028 | 0.961573                      | 0.00008 |

71 <sup>a</sup>Instrumental mass fractionation ( $\alpha$ ) defined by (equation 3 above).

72 <sup>b</sup>  $1 SD_{\text{mean}}$   $n = 12$ .

73

#### 74 **Data processing**

75 *calibration*

76 Detector yield and background corrected  $^x\text{S}/^{32}\text{S}$  raw ratios ( $R_{\text{raw}}$ ) were drift corrected  
 77 where deemed necessary using a linear regression:

$$78 \quad R_{\text{drift}} = R_{\text{raw}} - mx \quad (1)$$

79 where  $m$  is the slope of the regression and  $x$  is the analysis number between bracketing  
 80 standards, scaled to ensure that the intercept ( $c$ ) crosses the  $x$ -axis at  $x = 0$ . The drift corrected  
 81 ratios were expressed as raw delta values (VCDT) using:

$$82 \quad \delta^x S_{drift} = 1000 \left( \frac{R_{drift}}{{}^x R_{VCDT}} - 1 \right). \quad (2)$$

83 We used 0.00787766 for  ${}^{33}R_{VCDT}$ , 0.04417586 for  ${}^{34}R_{VCDT}$ , and 0.00015368 for  ${}^{36}R_{VCDT}$ .  
 84 mass fractionation ( $\alpha$ ) was then calculated as the infit and outfit corrected  $\sigma_{drift}^{-2}$  (see below)  
 85 weighted average of all estimates  $\alpha_i$  of the  $\delta^x S_{drift}$  values for the bracketing standards using:

$$86 \quad \alpha_i = \frac{1 + \left( \frac{\delta^x S_{drift}}{1000} \right)}{1 + \left( \frac{\delta^x S_{std}}{1000} \right)} \quad (3)$$

87 where  $\delta^x S_{std}$  is the  $\delta^x S$  value of the bracketing working standard used in the analyses relative  
 88 to VCDT. The  $\delta^x S$  estimate relative to VCDT for each sample spot was obtained by using:

$$89 \quad \delta^x S_{sample} = 1000 \left\{ \left[ 1 + \left( \frac{\delta^x S_{drift}}{1000} \right) \right] / \alpha - 1 \right\} \quad (4)$$

90

The Laser Fluorination values for our primary pyrite standard Son-3 relative to VCDT are

91

$$\delta^{33}S = 0.83 \pm 0.03, \delta^{34}S = 1.61 \pm 0.08, \text{ and } \delta^{36}S = 3.25 \pm 0.03 \text{ (mean } \pm \text{SD}_{\text{mean}} \text{ n=3)}$$

## 92 *Propagation of uncertainty*

93 We use the law of propagation of uncertainty to obtain expanded uncertainty  
 94 estimates for individual analyses including a covariance term for linear regression associated  
 95 with drift correction when used. The propagated error to include the uncertainty associated  
 96 with drift correction is given by:

97  $\sigma_{R_{drift}} = \sqrt{\sigma_i^2 + \sigma_{reg}^2}$ , (5)

98 where  $\sigma_i$  is the internal precision ( $SD_{mean}$  of the 15 analysis blocks (for static analyses) or 45  
 99 analysis blocks (for rastered analyses) of a single analysis  $i$  and  $\sigma_{reg}$  is the standard error of  
 100 the estimate of the linear regression used to model drift, given by:

101  $\sigma_{reg} = \sqrt{x^2 \sigma_m^2 + \sigma_c^2 + 2x\rho\sigma_m\sigma_c}$ . (6)

102  $\sigma_m$  and  $\sigma_c$  are the standard errors associated with the estimation of slope and intercept  
 103 respectively and  $\rho$  is the correlation coefficient for the regression. The uncertainty of  $\delta^x S_{drift}$  is  
 104 given by:

105  $\sigma_{drift} = \sqrt{\left( \frac{1000}{x R_{VCDT}} \cdot \sigma_{R_{drift}} \right)^2}$ . (7)

106 The uncertainty of individual  $\alpha_i$  estimates is given by:

107  $\sigma_{\alpha i} = \sqrt{\left[ \frac{1}{(1000 + \delta^x S_{std})} \cdot \sigma_{drift} \right]^2 + \left\{ -\sigma_{std} \left[ \frac{1000 + \delta^x S_{drift}}{(1000 + \delta^x S_{std})^2} \right] \right\}^2}$  (8)

108 where  $\sigma_{std}$  is the uncertainty of the reference value of the appropriate working standard. The  
 109 uncertainty associated with  $\alpha$  ( $\sigma_\alpha$ ) is the weighted mean standard error of the individual  
 110 estimates  $\alpha_i$  obtained from the drift corrected standards that have been scaled for underfit or  
 111 overfit using

112  $\sigma_\alpha * \frac{1}{(n-1)} * \sum_{i=1}^n \frac{(\alpha_i - \bar{\alpha})^2}{\sigma_{\alpha i}^2}$  (9)

113

114 . The propagated uncertainty for the  $\delta^{18}O$  value of each sample spot is given by:

115 
$${}^x\sigma_{sample} = \sqrt{\left(\frac{1}{\alpha} \cdot \sigma_{drift}\right)^2 + \left[\sigma_{\alpha} \left(-\frac{1000 + \delta^x S_{sample}}{\alpha^2}\right)\right]^2} .$$
 (10)

116 
$$\Delta^{33}\sigma = \sqrt{\left(\delta^{33}\sigma_{sample}\right)^2 + \left[\delta^{34}\sigma * 0.515 \left(1 + \frac{\delta^{34}S}{1000}\right)^{-0.485} - 1\right]^2}$$
 (11)

117  
and

118 
$$\Delta^{36}\sigma = \sqrt{\left(\delta^{36}\sigma_{sample}\right)^2 + \left[\delta^{34}\sigma * 1.9 \left(1 + \frac{\delta^{34}S}{1000}\right)^{0.9} - 1\right]^2} .$$
 (12)

119

120

121 **Evaluation of uncertainty introduced by partial overlap with nonsulfide phases**

122

123 The placement of the primary beam on pyrite grains for one session (Mount 2-sample  
 124 GKF01-834.6m) was offset by about 10 microns from where we thought the beam was  
 125 aimed. Since the grains were only 20-30 microns across, this yielded analyses of spots with  
 126 variable amounts of overlap with nonsulfide phases. The grains in this sample are  
 127 disseminated pyrite and appear to possess a homogenous  $\Delta^{33}S$  and  $\Delta^{36}S$  values. The  $\delta^{34}S$   
 128 values appear to be variable, and it is unclear whether this is real heterogeneity or an artifact  
 129 of grain overlap. A plot of  $\Delta^{33}S$  versus count rate ( $^{32}S$ ) is presented in Figure S1. SEM and  
 130 BSE images and data for these spots are presented below in Figure S2 and Table S2.

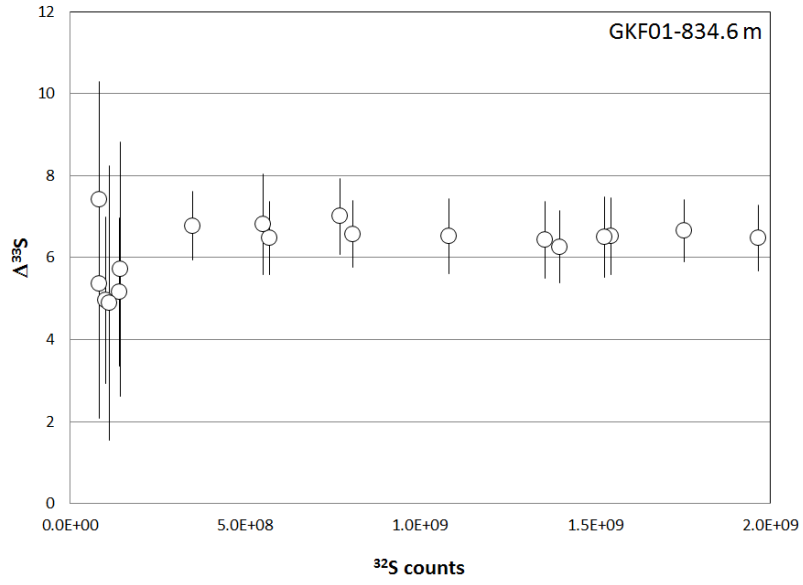

131  
132  
133  
134  
135  
136

**Figure S1:** Plot of  $\Delta^{33}\text{S}$  versus count rate ( $^{32}\text{S}$ ). Error bars are 2 times the SIMS uncertainty.

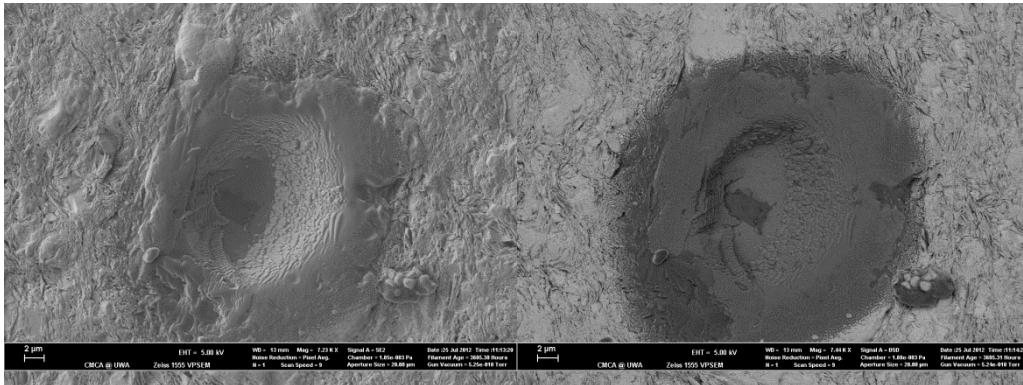

137  
138

Mount 2 Grain 1

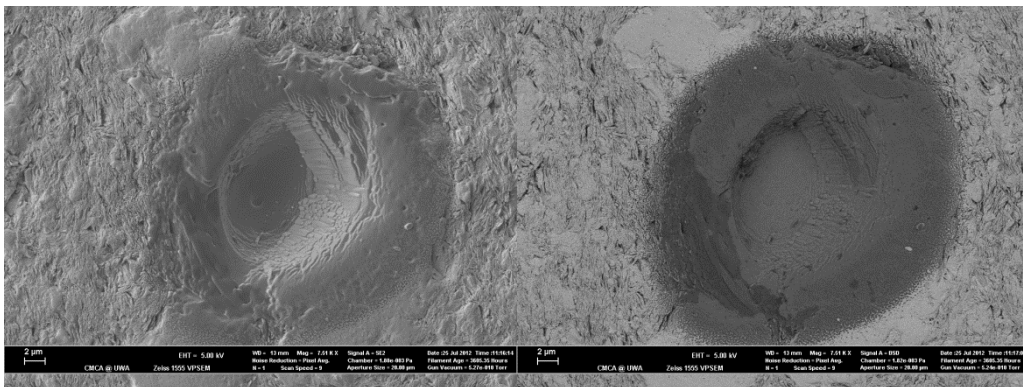

139  
140

MOUNT 2 GRAIN 2

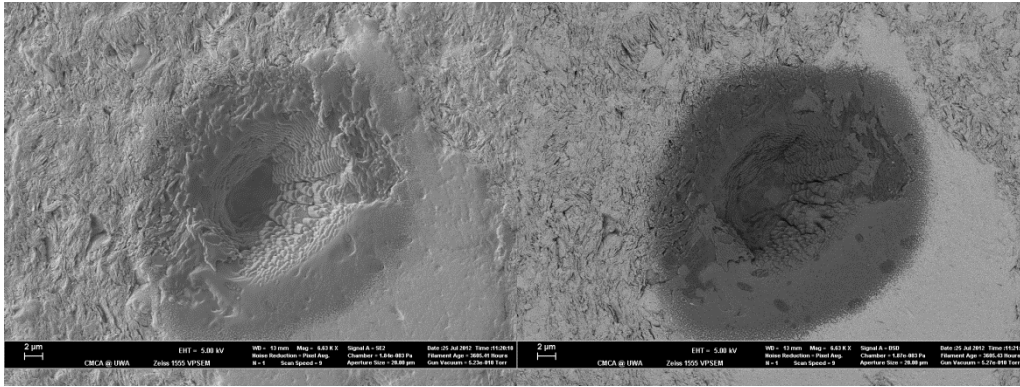

141  
142

MOUNT 2 GRAIN 3

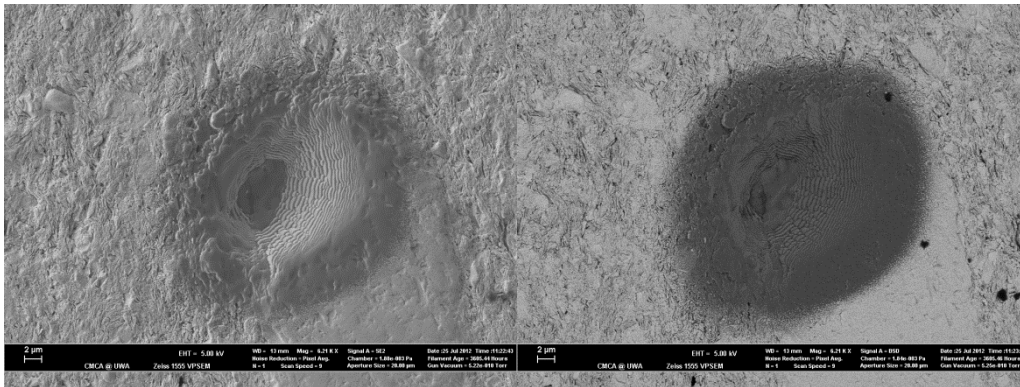

143

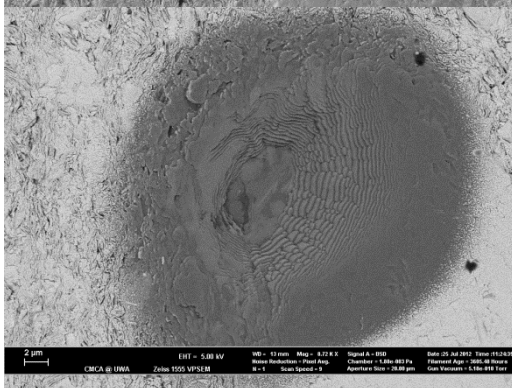

144  
145

MOUNT 2 GRAIN 4



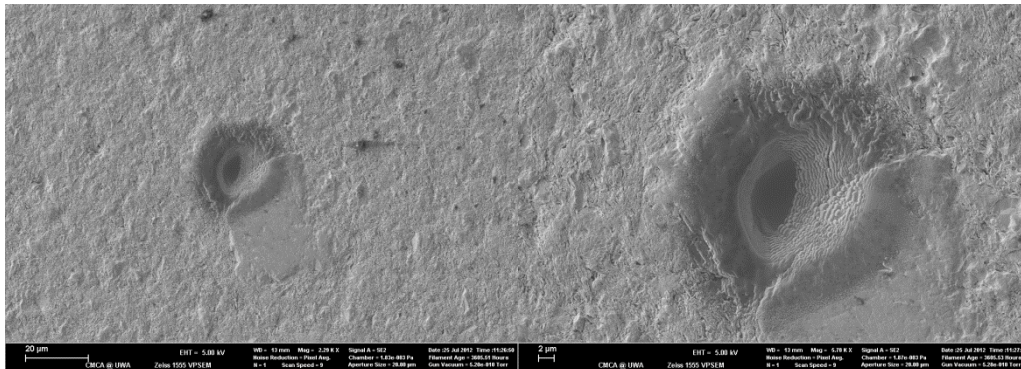

146

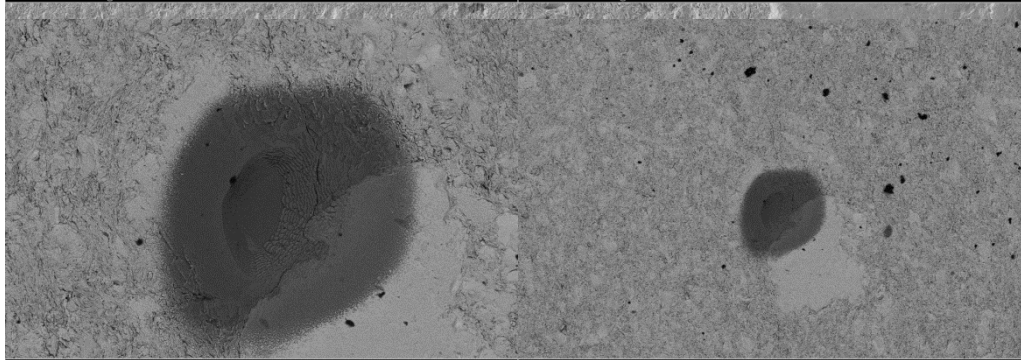

147  
148

MOUNT 2 GRAIN 5

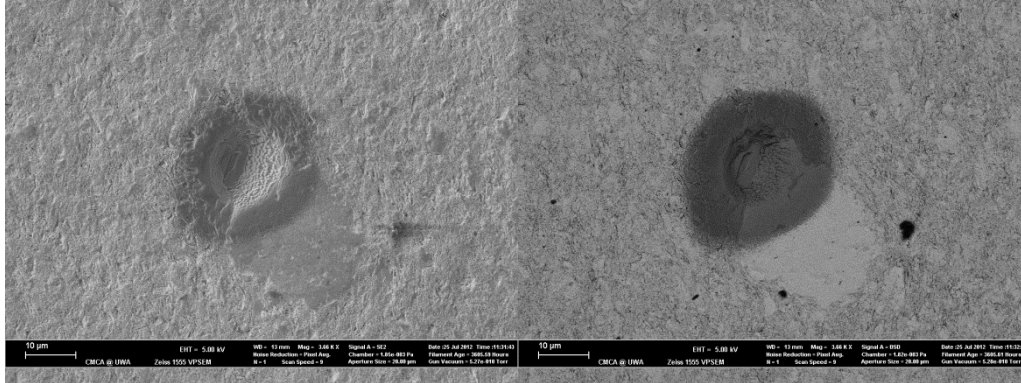

149  
150

MOUNT 2 GRAIN 6

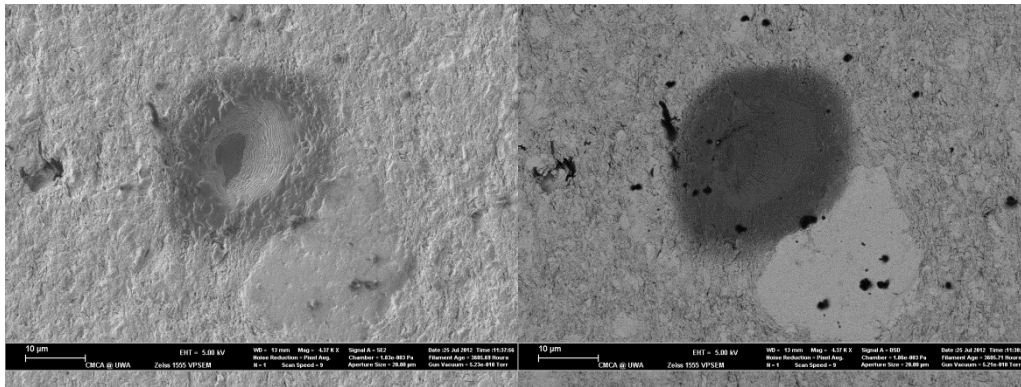

151

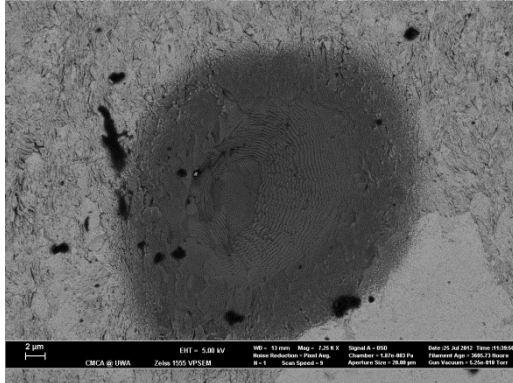

152  
153

MOUNT 2 GRAIN 7

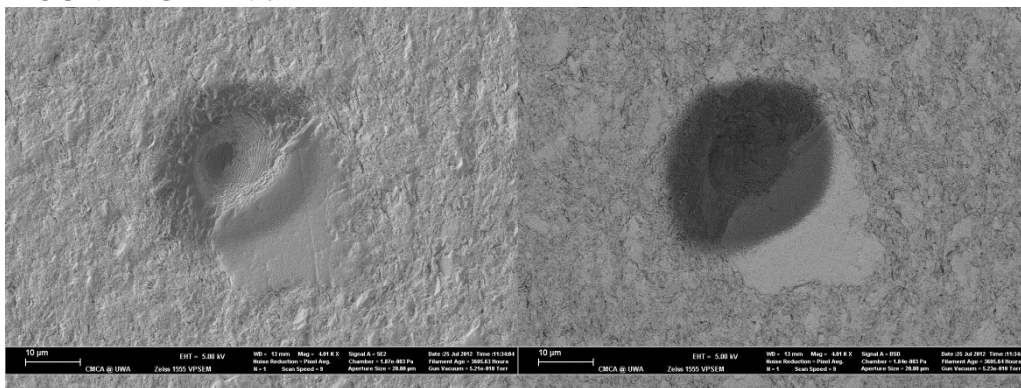

154

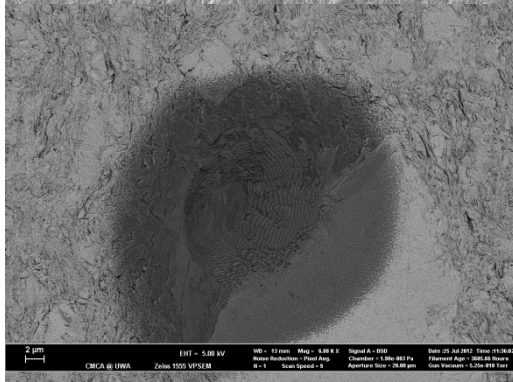

155  
156

MOUNT 2 GRAIN 8

157

158 **Figure S2:** SEM and BSE images of SIMS pits for sample Mount 2 GKF01-834.6m. Each

159 SIMS pit was occupied for three successive analyses (@1, @2, @3).

160

161 **Table S2**

| Analysis | $^{32}\text{S}_{\text{counts}}$ | $\delta^{33}\text{S}_{\text{VCDT}}$ | unc  | $\delta^{34}\text{S}_{\text{VCDT}}$ | unc  | $\delta^{36}\text{S}_{\text{VCDT}}$ | unc  | $\Delta^{33}\text{S}_{\text{VCDT}}$ | unc  | $\Delta^{36}\text{S}_{\text{VCDT}}$ | unc  |
|----------|---------------------------------|-------------------------------------|------|-------------------------------------|------|-------------------------------------|------|-------------------------------------|------|-------------------------------------|------|
| #2-1@1   | 1.4E+09                         | 9.46                                | 0.21 | 6.22                                | 0.13 | 3.18                                | 0.41 | 6.26                                | 0.44 | -8.66                               | 0.41 |
| #2-1@2   | 1.54E+09                        | 10.37                               | 0.18 | 7.49                                | 0.31 | 5.51                                | 0.66 | 6.52                                | 0.47 | -8.76                               | 0.66 |
| #2-1@3   | 1.75E+09                        | 11.84                               | 0.17 | 10.10                               | 0.16 | 11.22                               | 0.35 | 6.65                                | 0.38 | -8.06                               | 0.35 |
| #2-2@1   | 1.36E+09                        | 9.14                                | 0.22 | 5.24                                | 0.17 | 1.19                                | 0.50 | 6.44                                | 0.47 | -8.80                               | 0.50 |
| #2-2@2   | 1.53E+09                        | 9.85                                | 0.18 | 6.52                                | 0.32 | 3.25                                | 0.73 | 6.50                                | 0.49 | -9.17                               | 0.73 |
| #2-2@3   | 1.97E+09                        | 9.74                                | 0.17 | 6.34                                | 0.20 | 3.90                                | 0.48 | 6.47                                | 0.40 | -8.19                               | 0.48 |
| #2-3@1   | 5.7E+08                         | 9.10                                | 0.22 | 5.10                                | 0.07 | 0.54                                | 0.49 | 6.48                                | 0.45 | -9.16                               | 0.49 |
| #2-3@2   | 7.71E+08                        | 10.75                               | 0.17 | 7.29                                | 0.29 | 3.82                                | 0.76 | 7.00                                | 0.46 | -10.08                              | 0.76 |
| #2-3@3   | 3.49E+08                        | 12.70                               | 0.19 | 11.54                               | 0.16 | 12.74                               | 0.61 | 6.78                                | 0.42 | -9.31                               | 0.61 |
| #2-5@1   | 1.02E+08                        | 7.64                                | 0.50 | 5.21                                | 0.11 | 1.82                                | 1.09 | 4.96                                | 1.02 | -8.10                               | 1.09 |
| #2-5@2   | 1.4E+08                         | 8.64                                | 0.43 | 6.78                                | 0.29 | 5.53                                | 1.06 | 5.16                                | 0.91 | -7.39                               | 1.06 |
| #2-5@3   | 1.13E+08                        | 10.79                               | 0.83 | 11.48                               | 0.21 | 14.94                               | 1.03 | 4.89                                | 1.67 | -6.99                               | 1.03 |
| #2-6@1   | 8.07E+08                        | 9.12                                | 0.20 | 4.95                                | 0.09 | 0.45                                | 0.42 | 6.57                                | 0.41 | -8.98                               | 0.42 |
| #2-6@2   | 1.08E+09                        | 10.67                               | 0.18 | 8.07                                | 0.29 | 6.55                                | 0.65 | 6.52                                | 0.46 | -8.83                               | 0.65 |
| #2-6@3   | 5.5E+08                         | 13.02                               | 0.26 | 12.10                               | 0.32 | 14.80                               | 0.56 | 6.81                                | 0.62 | -8.31                               | 0.56 |
| #2-8@1   | 1.42E+08                        | 8.20                                | 0.77 | 4.84                                | 0.12 | -1.35                               | 1.30 | 5.71                                | 1.55 | -10.57                              | 1.30 |
| #2-8@2   | 83249610                        | 10.01                               | 0.81 | 9.04                                | 0.33 | 9.12                                | 1.29 | 5.37                                | 1.65 | -8.13                               | 1.29 |
| #2-8@3   | 82869510                        | 13.79                               | 0.71 | 12.40                               | 0.24 | 16.60                               | 1.19 | 7.42                                | 1.44 | -7.09                               | 1.19 |

162

163 **Sample Analysis and Sample Data**

164 The three epoxy mounts studied here were photographed (Figure S3) and  
165 representative images of SIMS pits are presented following. SIMS data for all sessions (and  
166 data used in plotting) is included in Table S3 and S4.

167

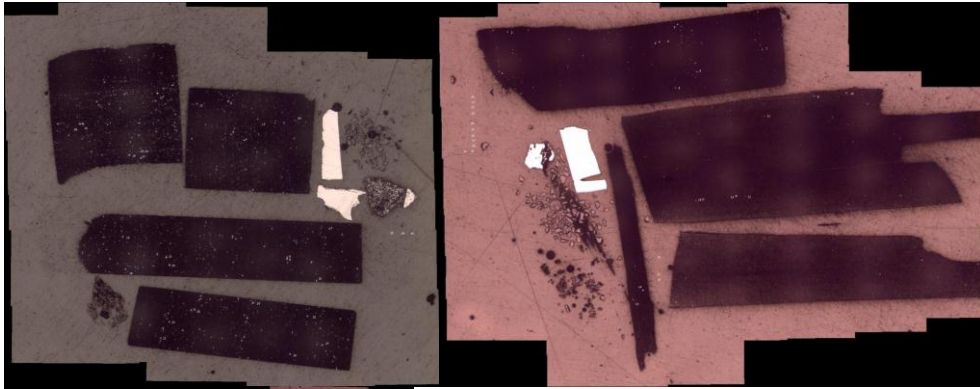

168  
169

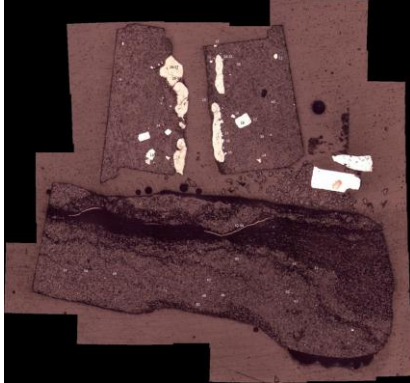

170  
171  
172  
173  
174  
175

**Figure S3.** Photomosaics of epoxy mounts studied here. Sample mount 1 (upper left) includes two equant pieces of 729.5 (top) and two long pieces of 829.5 (bottom). Sample mount 2 (upper right) includes one piece of 835.6 (top) and three pieces of 1404 (lower right). Sample mount 4 (lower left) includes two pieces of sample 1102.6 (top) and one large piece of 888.3 (bottom).

176  
177

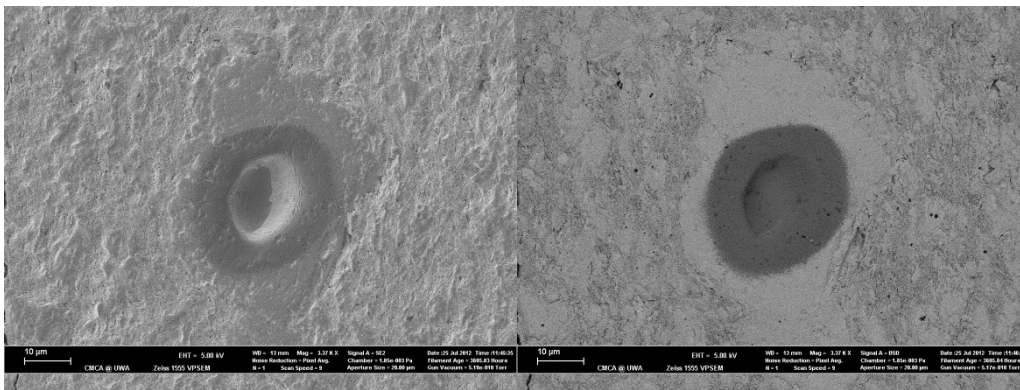

GKF01 Mount 1 spot 1

178

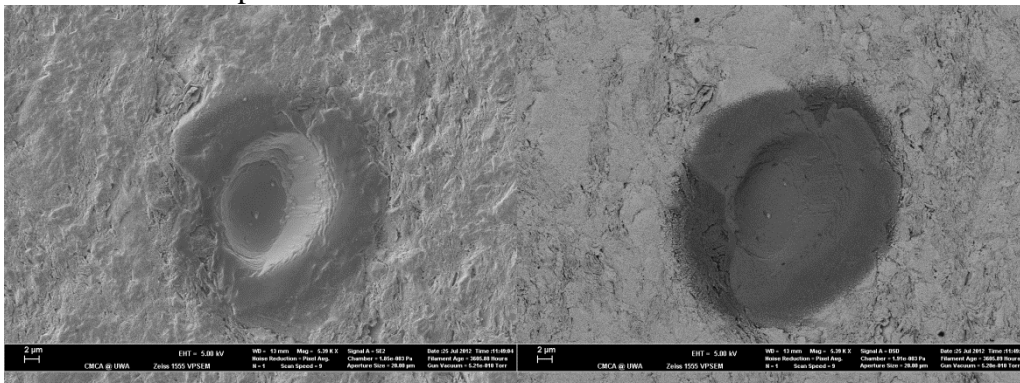

179 GKF01 Mount 1 spot 2

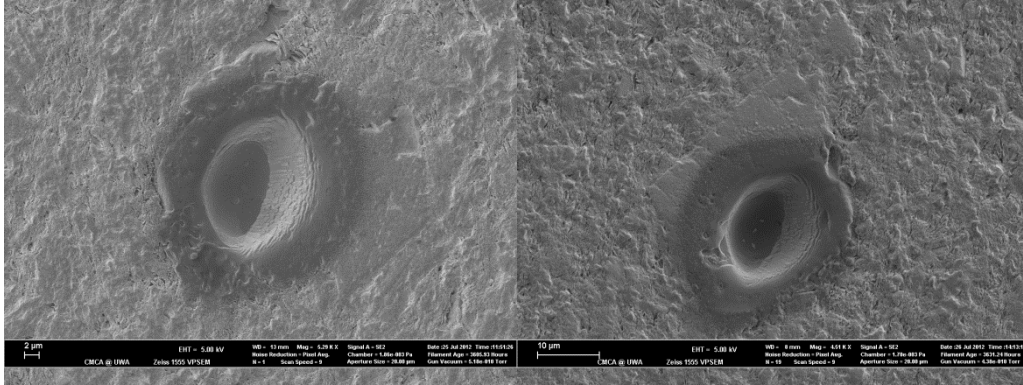

180  
181 GKF01 Mount 1 spot 3

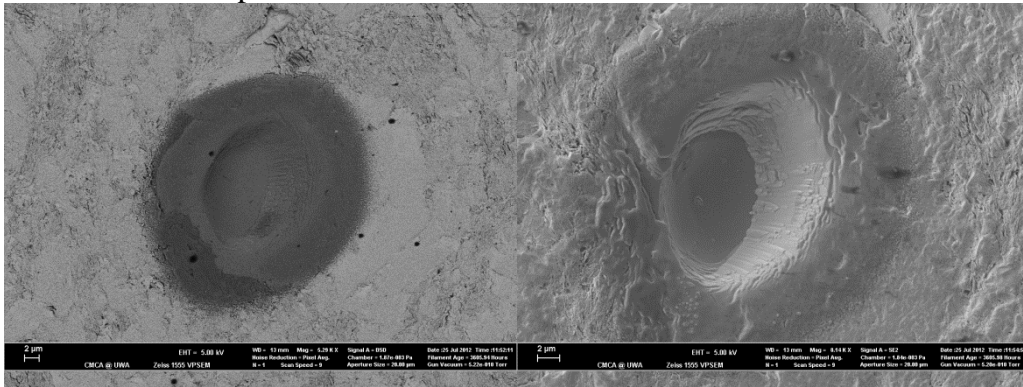

182  
183 GKF01 Mount 1 spot 4

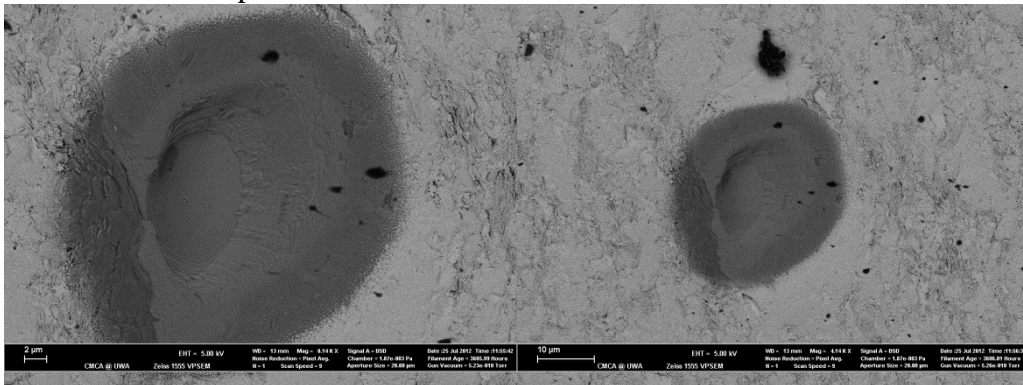

184  
185 GKF01 Mount 1 spot 5

186

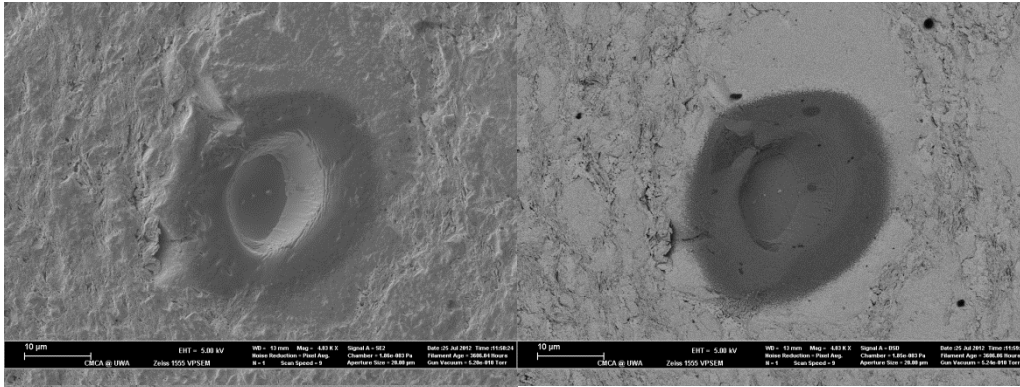

187  
188  
189

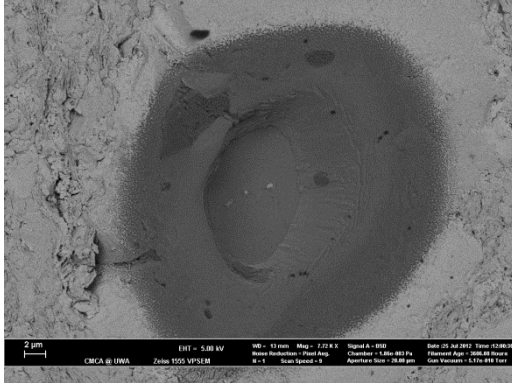

GKF01 Mount 1 spot 6

190  
191  
192

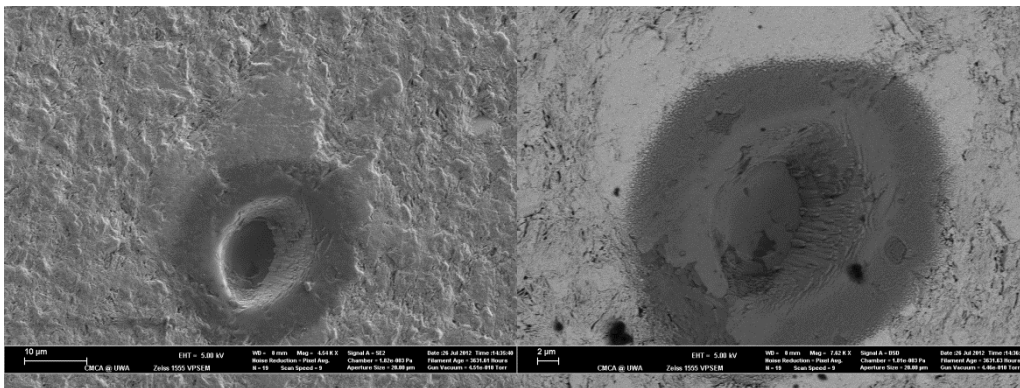

GKF01 Mount 1 spot 7

193  
194  
195

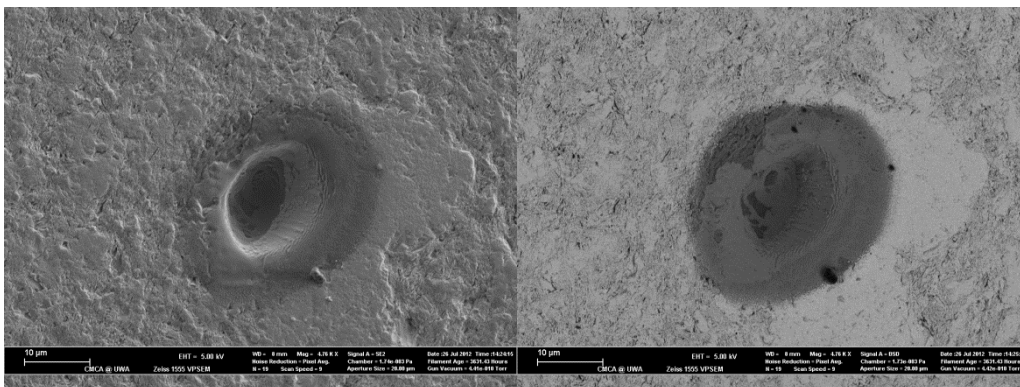

GKF01 Mount 1 spot 8

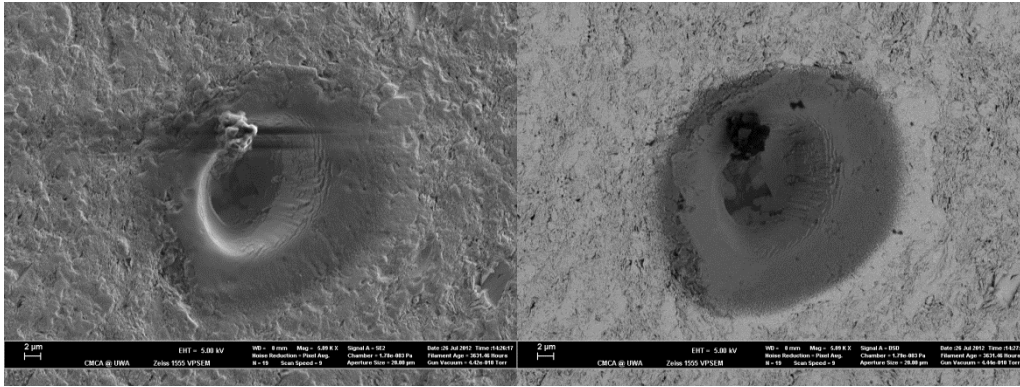

196  
197  
198  
GKF01 Mount 1 spot 9

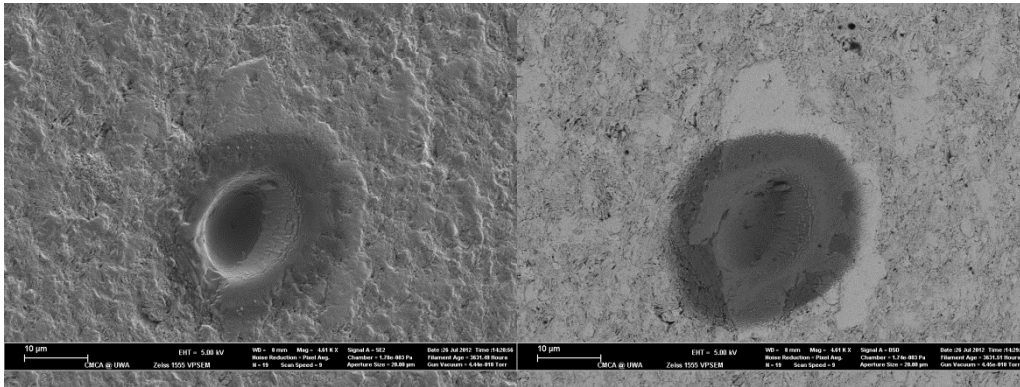

199  
200  
201  
202  
GKF01 Mount 1 spot 10

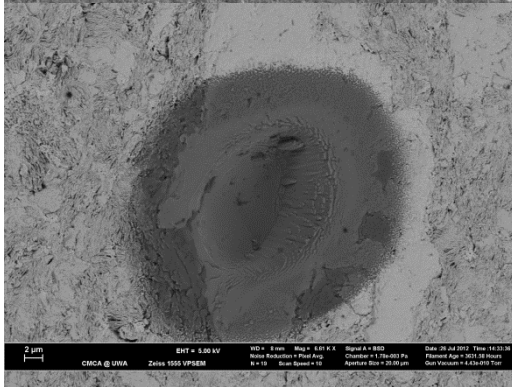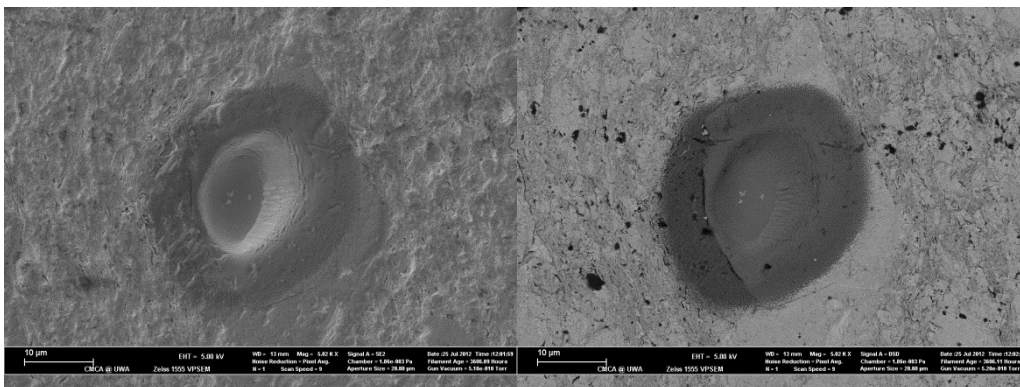

203  
204  
GKF01 Mount 1 spot 11

205  
206

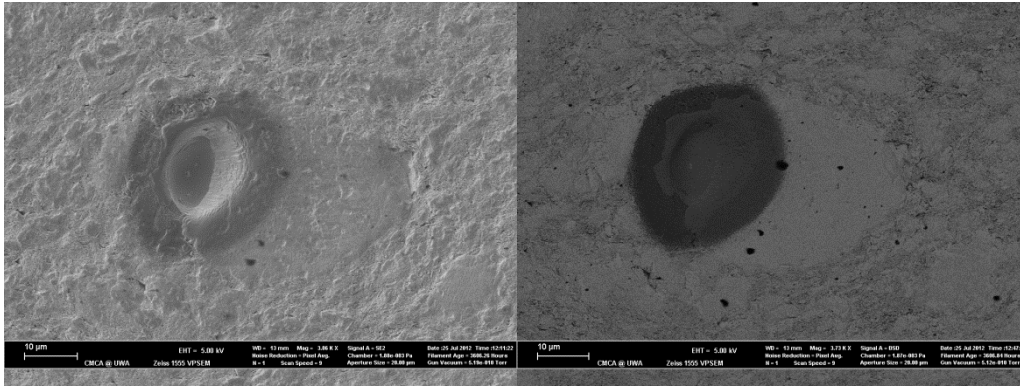

GKF01 Mount 1 spot 13

207  
208

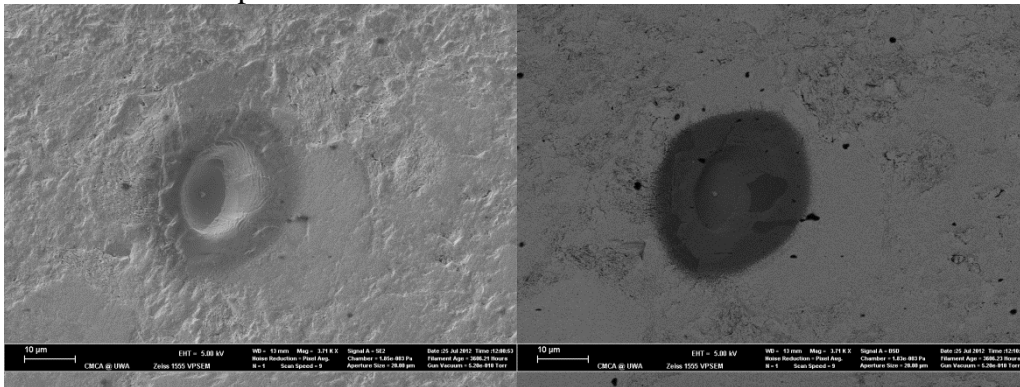

GKF01 Mount 1 spot 13

209  
210

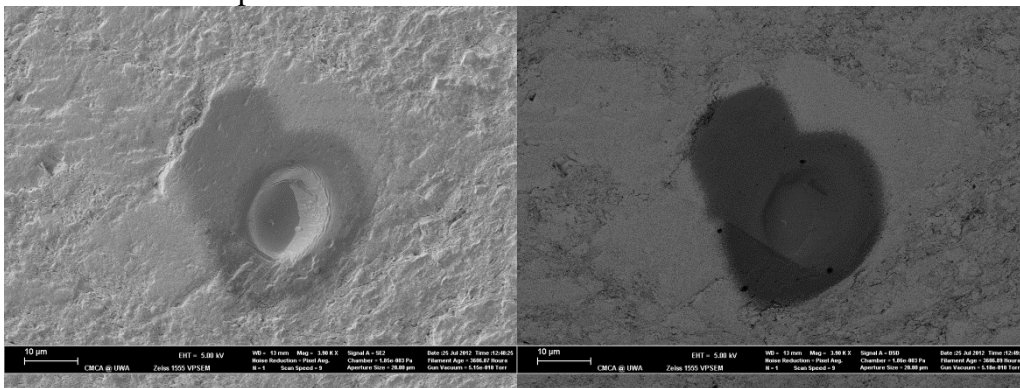

GKF01 Mount 1 spot 14

211  
212

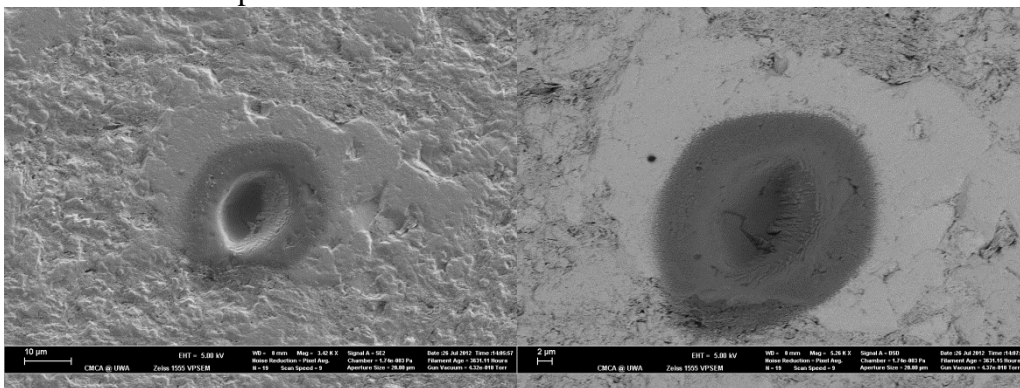

GKF01 Mount 1 spot 15



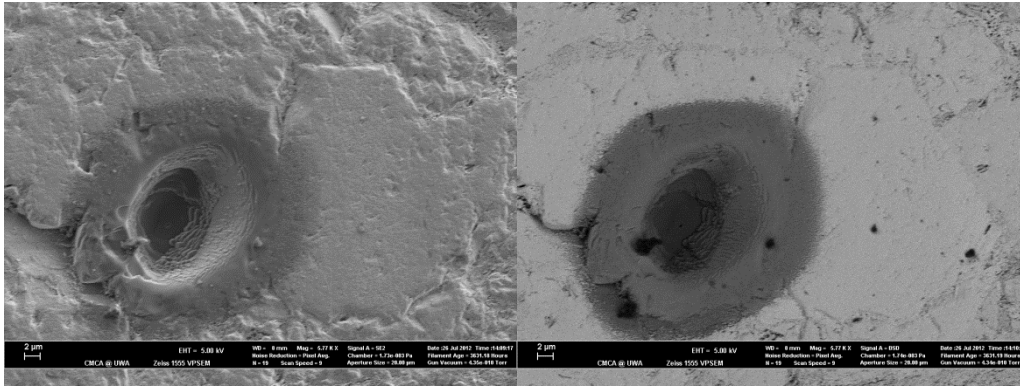

213  
214 GKF01 Mount 1 spot 16

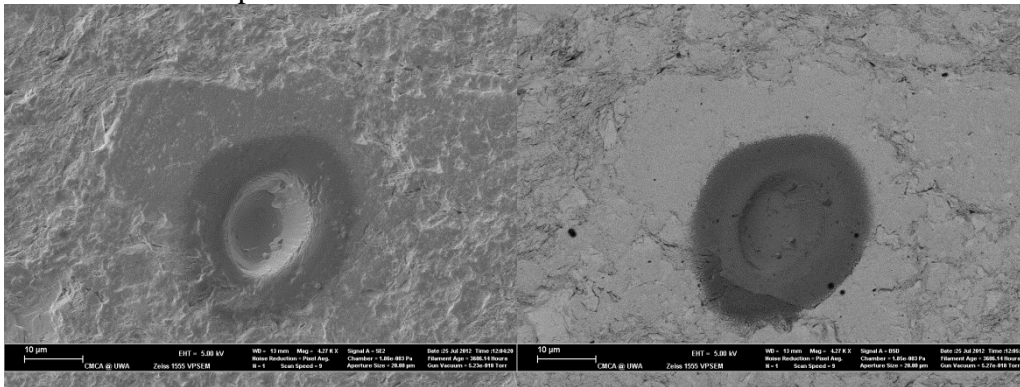

215  
216 GKF01 Mount 1 spot 17

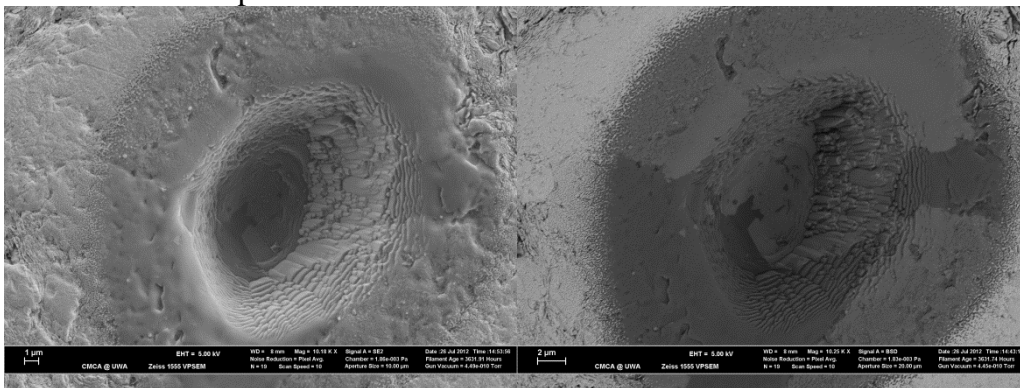

217

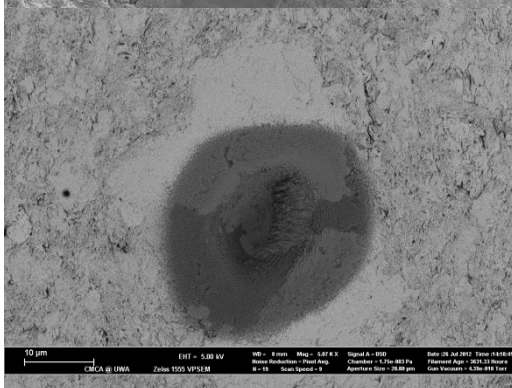

218  
219 GKF01 Mount 1 spot 18

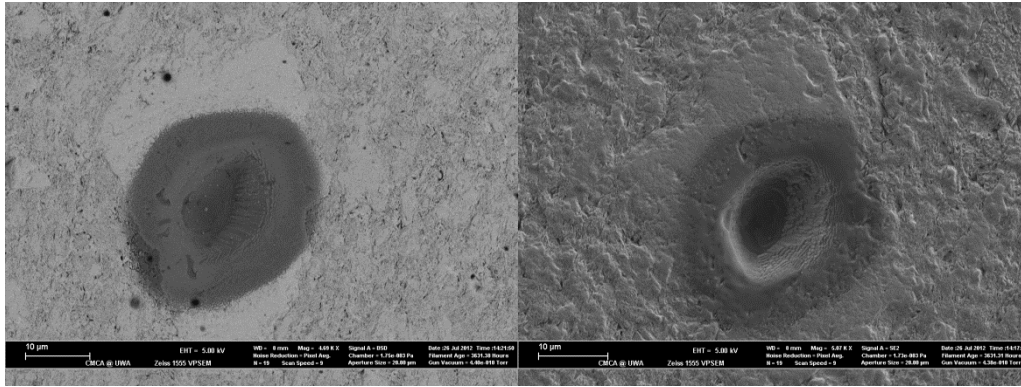

220  
221 GKF01 Mount 1 spot 20 or 21  
222

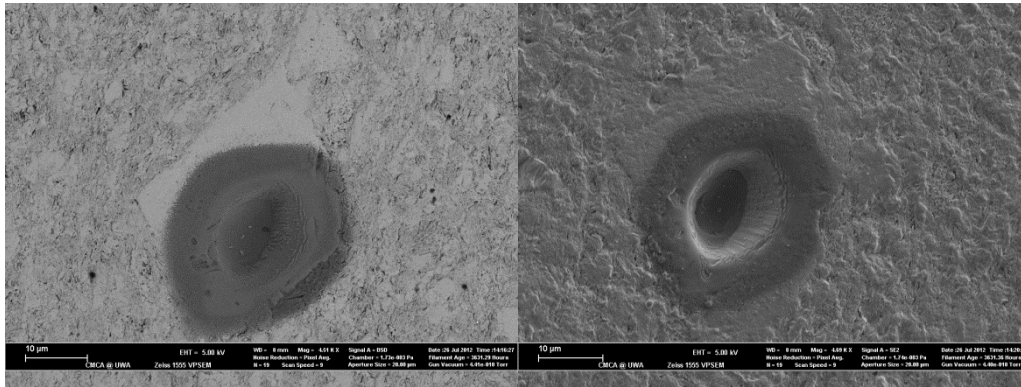

223  
224 GKF01 Mount 1 spot 19  
225  
226

Representative SEM images of SIMS pits of other samples are below:

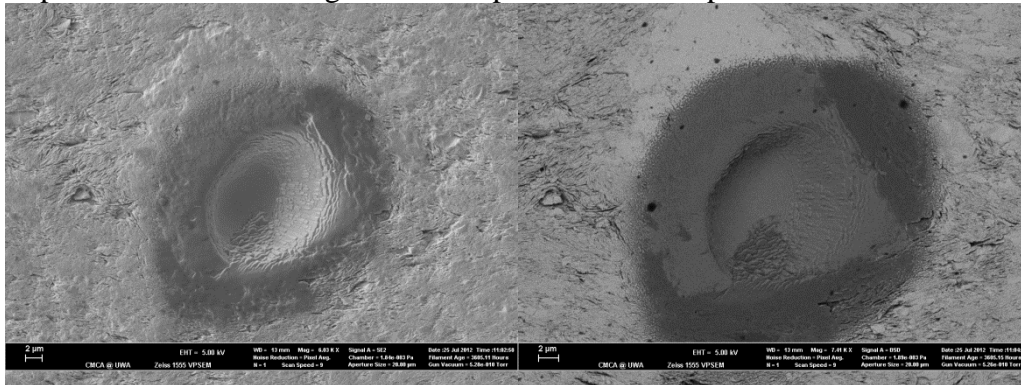

227  
228 MOUNT 2 GRAIN 9

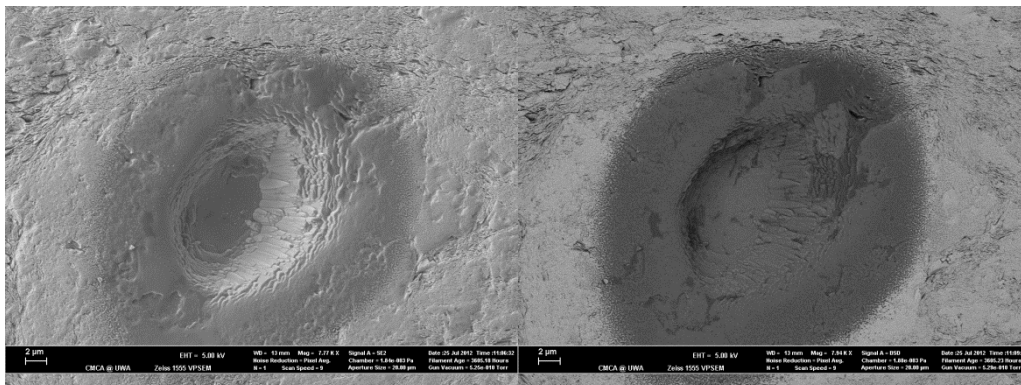

229  
230 MOUNT 2 GRAIN 10

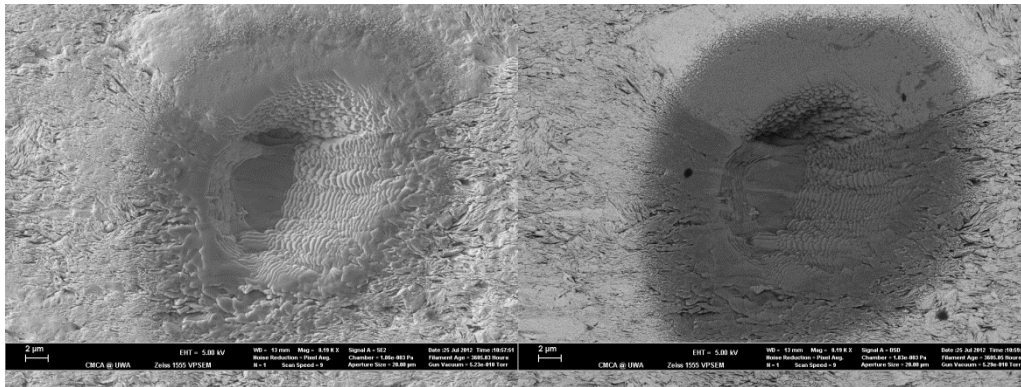

231

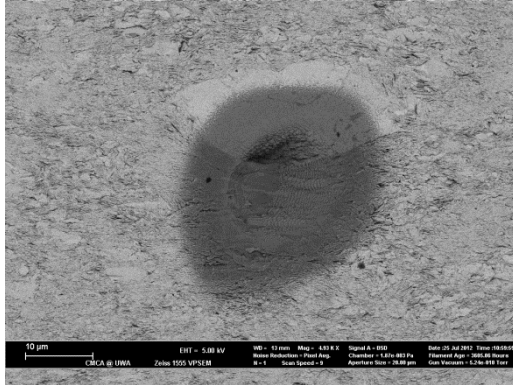

232  
233

MOUNT 2 GRAIN 11

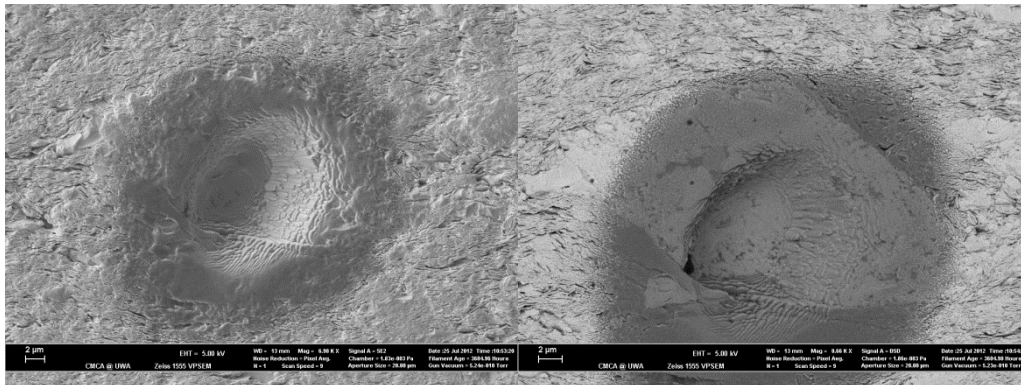

234  
235

Mount 2 GRAIN 12

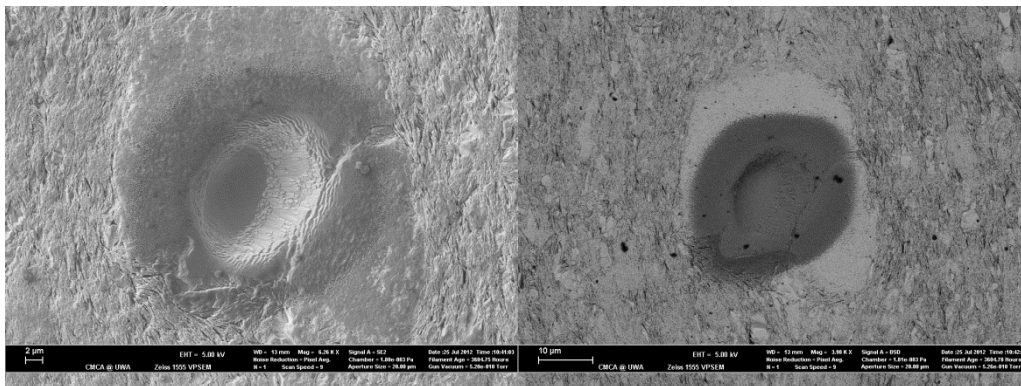

236  
237

MOUNT 2 GRAIN 13

238

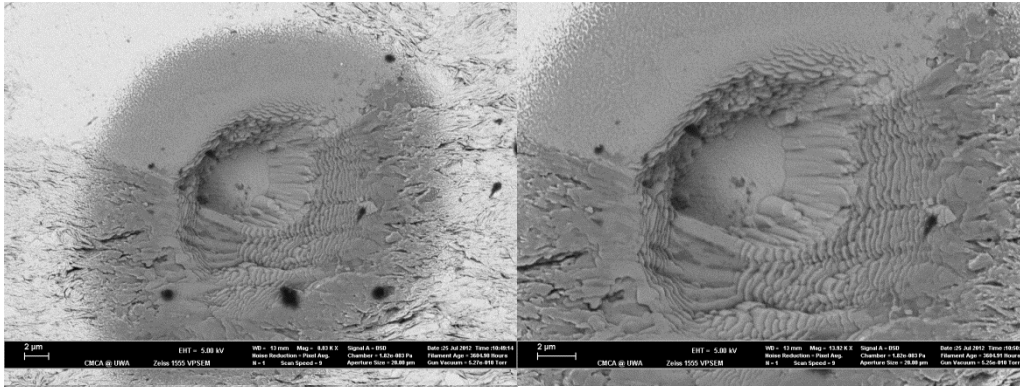

239  
240

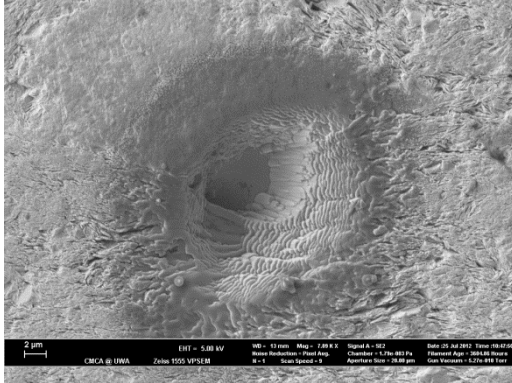

MOUNT 2 GRAIN 14

241

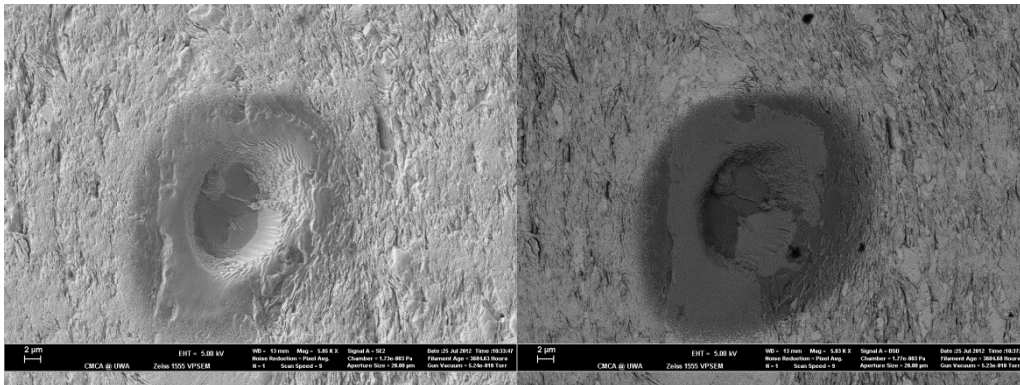

242  
243  
244  
245

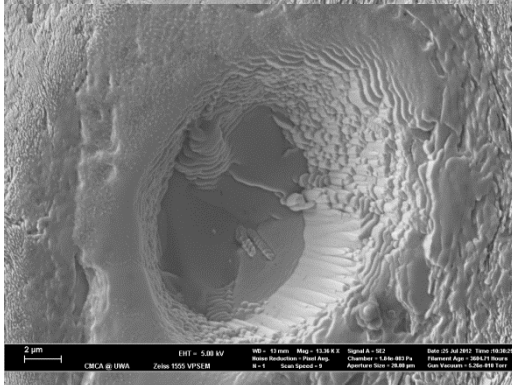

MOUNT 2 GRAIN 15

246

247 **Table S3 Data:****GKF01-mount4-grain1**

| <b>Analysis</b>              | <b><math>^{32}\text{S}_{\text{counts}}</math></b> | <b><math>\delta^{33}\text{S}_{\text{VCDT}}</math></b> | <b>unc</b> | <b><math>\delta^{34}\text{S}_{\text{VCDT}}</math></b> | <b>unc</b> | <b><math>\delta^{36}\text{S}_{\text{VCDT}}</math></b> | <b>unc</b> | <b><math>\Delta^{33}\text{S}_{\text{VCDT}}</math></b> | <b>unc</b> | <b><math>\Delta^{36}\text{S}_{\text{VCDT}}</math></b> | <b>unc</b> |
|------------------------------|---------------------------------------------------|-------------------------------------------------------|------------|-------------------------------------------------------|------------|-------------------------------------------------------|------------|-------------------------------------------------------|------------|-------------------------------------------------------|------------|
| Son@1                        | 2.23E+09                                          | 0.71                                                  | 0.04       | 1.56                                                  | 0.02       | 3.06                                                  | 0.16       | -0.09                                                 | 0.09       | 0.09                                                  | 0.16       |
| Son@02                       | 2.17E+09                                          | 0.76                                                  | 0.04       | 1.58                                                  | 0.02       | 3.18                                                  | 0.17       | -0.06                                                 | 0.09       | 0.19                                                  | 0.17       |
| Son@03                       | 2.10E+09                                          | 0.82                                                  | 0.04       | 1.67                                                  | 0.02       | 3.53                                                  | 0.16       | -0.04                                                 | 0.09       | 0.37                                                  | 0.16       |
| Son@04                       | 2.07E+09                                          | 0.85                                                  | 0.05       | 1.69                                                  | 0.02       | 3.28                                                  | 0.17       | -0.02                                                 | 0.10       | 0.06                                                  | 0.17       |
| Son@05                       | 2.06E+09                                          | 0.73                                                  | 0.04       | 1.42                                                  | 0.02       | 3.14                                                  | 0.16       | 0.00                                                  | 0.09       | 0.44                                                  | 0.16       |
| GKF01_mount4_1102_grain-1@1  | 1.96E+09                                          | -10.57                                                | 0.05       | -18.83                                                | 0.02       | -33.58                                                | 0.16       | -0.83                                                 | 0.10       | 1.89                                                  | 0.16       |
| GKF01_mount4_1102_grain-1@2  | 2.00E+09                                          | -11.39                                                | 0.04       | -20.13                                                | 0.02       | -35.78                                                | 0.16       | -0.97                                                 | 0.09       | 2.13                                                  | 0.16       |
| GKF01_mount4_1102_grain-1@3  | 1.99E+09                                          | -11.63                                                | 0.04       | -20.61                                                | 0.02       | -36.94                                                | 0.16       | -0.96                                                 | 0.09       | 1.86                                                  | 0.16       |
| GKF01_mount4_1102_grain-1@4  | 1.91E+09                                          | -7.10                                                 | 0.05       | -13.31                                                | 0.02       | -24.08                                                | 0.19       | -0.22                                                 | 0.10       | 1.06                                                  | 0.19       |
| GKF01_mount4_1102_grain-1@5  | 1.92E+09                                          | -8.83                                                 | 0.05       | -16.04                                                | 0.02       | -28.98                                                | 0.16       | -0.54                                                 | 0.10       | 1.27                                                  | 0.16       |
| GKF01_mount4_1102_grain-1@6  | 1.97E+09                                          | -10.66                                                | 0.05       | -19.02                                                | 0.03       | -33.92                                                | 0.18       | -0.82                                                 | 0.09       | 1.91                                                  | 0.18       |
| Son@06                       | 2.02E+09                                          | 0.85                                                  | 0.05       | 1.67                                                  | 0.02       | 3.36                                                  | 0.16       | -0.01                                                 | 0.10       | 0.19                                                  | 0.16       |
| Son@07                       | 2.00E+09                                          | 0.79                                                  | 0.05       | 1.56                                                  | 0.02       | 3.51                                                  | 0.16       | -0.01                                                 | 0.09       | 0.55                                                  | 0.16       |
| GKF01_mount4_1102_grain-1@7  | 1.95E+09                                          | -11.35                                                | 0.05       | -20.35                                                | 0.02       | -36.52                                                | 0.18       | -0.81                                                 | 0.09       | 1.79                                                  | 0.18       |
| GKF01_mount4_1102_grain-1@8  | 1.92E+09                                          | -11.57                                                | 0.05       | -20.79                                                | 0.02       | -37.63                                                | 0.16       | -0.81                                                 | 0.10       | 1.49                                                  | 0.16       |
| GKF01_mount4_1102_grain-1@9  | 1.99E+09                                          | -10.66                                                | 0.05       | -18.94                                                | 0.02       | -33.55                                                | 0.16       | -0.86                                                 | 0.09       | 2.14                                                  | 0.16       |
| GKF01_mount4_1102_grain-1@10 | 1.94E+09                                          | -11.06                                                | 0.04       | -19.68                                                | 0.02       | -35.36                                                | 0.17       | -0.87                                                 | 0.09       | 1.71                                                  | 0.17       |
| GKF01_mount4_1102_grain-1@11 | 1.98E+09                                          | -11.70                                                | 0.04       | -20.86                                                | 0.02       | -37.66                                                | 0.16       | -0.90                                                 | 0.09       | 1.61                                                  | 0.16       |
| GKF01_mount4_1102_grain-1@12 | 2.05E+09                                          | -11.55                                                | 0.04       | -20.64                                                | 0.02       | -37.33                                                | 0.17       | -0.87                                                 | 0.09       | 1.52                                                  | 0.17       |
| Son@08                       | 2.08E+09                                          | 0.86                                                  | 0.04       | 1.62                                                  | 0.02       | 3.01                                                  | 0.16       | 0.02                                                  | 0.09       | -0.07                                                 | 0.16       |
| Son@09                       | 2.10E+09                                          | 0.88                                                  | 0.04       | 1.64                                                  | 0.02       | 3.54                                                  | 0.16       | 0.03                                                  | 0.09       | 0.42                                                  | 0.16       |
| GKF01_mount4_1102_grain-1@13 | 2.09E+09                                          | -11.02                                                | 0.05       | -19.69                                                | 0.02       | -35.15                                                | 0.16       | -0.84                                                 | 0.09       | 1.93                                                  | 0.16       |
| GKF01_mount4_1102_grain-1@14 | 2.09E+09                                          | -11.18                                                | 0.04       | -20.02                                                | 0.02       | -36.13                                                | 0.16       | -0.82                                                 | 0.09       | 1.56                                                  | 0.16       |

|                              |          |        |      |        |      |        |      |       |      |       |      |
|------------------------------|----------|--------|------|--------|------|--------|------|-------|------|-------|------|
| GKF01_mount4_1102_grain-1@15 | 2.10E+09 | -11.16 | 0.04 | -19.79 | 0.02 | -35.45 | 0.16 | -0.91 | 0.09 | 1.81  | 0.16 |
| GKF01_mount4_1102_grain-1@16 | 2.10E+09 | -11.18 | 0.05 | -19.88 | 0.02 | -35.40 | 0.16 | -0.89 | 0.10 | 2.03  | 0.16 |
| GKF01_mount4_1102_grain-1@17 | 2.07E+09 | -9.56  | 0.05 | -17.27 | 0.03 | -31.22 | 0.16 | -0.62 | 0.10 | 1.34  | 0.16 |
| GKF01_mount4_1102_grain-1@18 | 2.09E+09 | -10.63 | 0.04 | -19.04 | 0.02 | -34.19 | 0.16 | -0.78 | 0.09 | 1.68  | 0.16 |
| Son@10                       | 2.12E+09 | 0.90   | 0.04 | 1.66   | 0.02 | 3.31   | 0.17 | 0.04  | 0.09 | 0.16  | 0.17 |
| Son@11                       | 2.11E+09 | 0.92   | 0.04 | 1.69   | 0.02 | 3.40   | 0.17 | 0.05  | 0.09 | 0.19  | 0.17 |
| Son@12                       | 2.11E+09 | 0.75   | 0.05 | 1.52   | 0.02 | 2.81   | 0.16 | -0.03 | 0.10 | -0.09 | 0.16 |
| Son@13                       | 2.14E+09 | 0.88   | 0.04 | 1.65   | 0.02 | 3.34   | 0.16 | 0.03  | 0.09 | 0.21  | 0.16 |
| Son@14                       | 2.10E+09 | 0.91   | 0.04 | 1.69   | 0.02 | 3.22   | 0.16 | 0.04  | 0.09 | 0.01  | 0.16 |
| Son@15                       | 2.08E+09 | 0.84   | 0.04 | 1.55   | 0.02 | 3.04   | 0.17 | 0.04  | 0.09 | 0.10  | 0.17 |
| son@1                        | 2.43E+09 | 0.80   | 0.03 | 1.64   | 0.02 | 3.34   | 0.16 | -0.05 | 0.06 | 0.22  | 0.16 |
| son@02                       | 2.39E+09 | 0.84   | 0.03 | 1.63   | 0.02 | 3.37   | 0.17 | 0.00  | 0.05 | 0.26  | 0.17 |
| son@03                       | 2.39E+09 | 0.80   | 0.02 | 1.60   | 0.02 | 3.17   | 0.16 | -0.02 | 0.05 | 0.13  | 0.16 |
| son@04                       | 2.38E+09 | 0.73   | 0.03 | 1.46   | 0.02 | 2.83   | 0.16 | -0.03 | 0.06 | 0.05  | 0.16 |
| son@05                       | 2.38E+09 | 0.82   | 0.02 | 1.62   | 0.02 | 3.50   | 0.16 | -0.02 | 0.05 | 0.42  | 0.16 |
| GKF01_mount4_1102_grain-1@19 | 2.35E+09 | -11.31 | 0.03 | -20.10 | 0.02 | -35.93 | 0.15 | -0.91 | 0.06 | 1.92  | 0.15 |
| GKF01_mount4_1102_grain-1@20 | 2.32E+09 | -12.08 | 0.02 | -21.55 | 0.02 | -38.74 | 0.15 | -0.92 | 0.05 | 1.81  | 0.15 |
| GKF01_mount4_1102_grain-1@21 | 2.37E+09 | -10.72 | 0.03 | -19.01 | 0.02 | -33.84 | 0.15 | -0.89 | 0.06 | 1.97  | 0.15 |
| GKF01_mount4_1102_grain-1@22 | 2.36E+09 | -10.41 | 0.02 | -18.32 | 0.02 | -32.51 | 0.15 | -0.94 | 0.05 | 2.00  | 0.15 |
| GKF01_mount4_1102_grain-1@23 | 2.38E+09 | -11.67 | 0.03 | -20.80 | 0.02 | -37.29 | 0.16 | -0.91 | 0.06 | 1.85  | 0.16 |
| GKF01_mount4_1102_grain-1@24 | 2.37E+09 | -11.05 | 0.03 | -19.71 | 0.02 | -35.57 | 0.15 | -0.85 | 0.06 | 1.55  | 0.15 |
| son@06                       | 2.44E+09 | 0.81   | 0.03 | 1.59   | 0.02 | 3.24   | 0.16 | -0.01 | 0.05 | 0.21  | 0.16 |
| son@07                       | 2.42E+09 | 0.84   | 0.02 | 1.65   | 0.02 | 3.29   | 0.16 | -0.01 | 0.05 | 0.16  | 0.16 |
| GKF01_mount4_1102_grain-1@25 | 2.39E+09 | -10.41 | 0.03 | -18.55 | 0.02 | -33.37 | 0.16 | -0.81 | 0.06 | 1.58  | 0.16 |
| GKF01_mount4_1102_grain-1@26 | 2.41E+09 | -11.40 | 0.03 | -20.38 | 0.02 | -36.43 | 0.16 | -0.85 | 0.05 | 1.94  | 0.16 |
| GKF01_mount4_1102_grain-1@27 | 2.39E+09 | -8.99  | 0.03 | -16.20 | 0.02 | -28.93 | 0.16 | -0.62 | 0.06 | 1.62  | 0.16 |
| GKF01_mount4_1102_grain-1@28 | 2.41E+09 | -11.02 | 0.03 | -19.62 | 0.02 | -35.10 | 0.17 | -0.87 | 0.06 | 1.85  | 0.17 |
| GKF01_mount4_1102_grain-1@29 | 2.44E+09 | -11.10 | 0.03 | -19.78 | 0.02 | -35.40 | 0.17 | -0.87 | 0.05 | 1.85  | 0.17 |
| GKF01_mount4_1102_grain-1@30 | 2.43E+09 | -11.10 | 0.02 | -19.82 | 0.02 | -35.86 | 0.17 | -0.85 | 0.05 | 1.46  | 0.17 |

|                              |          |        |      |        |      |        |      |       |      |       |      |
|------------------------------|----------|--------|------|--------|------|--------|------|-------|------|-------|------|
| son@08                       | 2.45E+09 | 0.85   | 0.03 | 1.55   | 0.02 | 3.16   | 0.17 | 0.05  | 0.06 | 0.22  | 0.17 |
| son@09                       | 2.47E+09 | 0.88   | 0.03 | 1.69   | 0.02 | 3.32   | 0.17 | 0.01  | 0.06 | 0.12  | 0.17 |
| GKF01_mount4_1102_grain-1@31 | 2.35E+09 | -8.40  | 0.03 | -15.12 | 0.02 | -27.08 | 0.18 | -0.58 | 0.06 | 1.44  | 0.18 |
| GKF01_mount4_1102_grain-1@32 | 2.43E+09 | -9.57  | 0.02 | -17.10 | 0.02 | -30.84 | 0.19 | -0.73 | 0.05 | 1.40  | 0.19 |
| GKF01_mount4_1102_grain-1@33 | 2.35E+09 | -11.32 | 0.03 | -20.17 | 0.02 | -36.46 | 0.19 | -0.88 | 0.06 | 1.52  | 0.19 |
| GKF01_mount4_1102_grain-1@34 | 2.42E+09 | -11.57 | 0.02 | -20.63 | 0.02 | -37.09 | 0.18 | -0.90 | 0.05 | 1.74  | 0.18 |
| GKF01_mount4_1102_grain-1@35 | 2.41E+09 | -10.81 | 0.03 | -19.29 | 0.02 | -34.41 | 0.19 | -0.83 | 0.06 | 1.92  | 0.19 |
| GKF01_mount4_1102_grain-1@36 | 2.39E+09 | -10.78 | 0.03 | -19.34 | 0.02 | -34.69 | 0.19 | -0.78 | 0.06 | 1.74  | 0.19 |
| son@10                       | 2.46E+09 | 0.89   | 0.03 | 1.71   | 0.02 | 3.65   | 0.19 | 0.01  | 0.05 | 0.40  | 0.19 |
| son@11                       | 2.48E+09 | 0.81   | 0.03 | 1.56   | 0.02 | 2.86   | 0.22 | 0.01  | 0.06 | -0.10 | 0.22 |
| son@12                       | 2.47E+09 | 0.87   | 0.02 | 1.59   | 0.02 | 3.19   | 0.22 | 0.05  | 0.05 | 0.17  | 0.22 |
| son@13                       | 2.47E+09 | 0.86   | 0.03 | 1.65   | 0.02 | 3.31   | 0.21 | 0.01  | 0.05 | 0.18  | 0.21 |
| son@14                       | 2.46E+09 | 0.82   | 0.02 | 1.63   | 0.01 | 3.21   | 0.13 | -0.02 | 0.04 | 0.11  | 0.13 |
| son@15                       | 2.45E+09 | 0.82   | 0.02 | 1.62   | 0.01 | 3.17   | 0.13 | -0.01 | 0.04 | 0.08  | 0.13 |
| son@16                       | 2.44E+09 | 0.88   | 0.02 | 1.64   | 0.01 | 3.21   | 0.13 | 0.03  | 0.04 | 0.08  | 0.13 |
| son@17                       | 2.45E+09 | 0.83   | 0.02 | 1.60   | 0.01 | 3.31   | 0.13 | 0.01  | 0.04 | 0.26  | 0.13 |
| son@18                       | 2.45E+09 | 0.87   | 0.02 | 1.61   | 0.01 | 3.22   | 0.14 | 0.04  | 0.04 | 0.15  | 0.14 |
| GKF01_mount4_1102_grain-1@37 | 2.39E+09 | -11.59 | 0.02 | -20.75 | 0.01 | -37.16 | 0.13 | -0.85 | 0.04 | 1.89  | 0.13 |
| GKF01_mount4_1102_grain-1@38 | 2.36E+09 | -10.08 | 0.02 | -18.09 | 0.01 | -32.29 | 0.13 | -0.73 | 0.05 | 1.80  | 0.13 |
| GKF01_mount4_1102_grain-1@39 | 2.34E+09 | -9.87  | 0.02 | -17.90 | 0.01 | -32.04 | 0.13 | -0.62 | 0.04 | 1.68  | 0.13 |
| GKF01_mount4_1102_grain-1@40 | 1.88E+09 | -7.65  | 0.03 | -14.18 | 0.01 | -26.20 | 0.14 | -0.33 | 0.05 | 0.56  | 0.14 |
| GKF01_mount4_1102_grain-1@41 | 2.39E+09 | -11.46 | 0.02 | -20.45 | 0.01 | -36.53 | 0.13 | -0.88 | 0.05 | 1.97  | 0.13 |
| GKF01_mount4_1102_grain-1@42 | 2.39E+09 | -11.23 | 0.02 | -19.97 | 0.01 | -35.39 | 0.13 | -0.90 | 0.05 | 2.20  | 0.13 |
| son@19                       | 2.44E+09 | 0.85   | 0.02 | 1.62   | 0.01 | 3.24   | 0.13 | 0.02  | 0.05 | 0.17  | 0.13 |
| son@20                       | 2.45E+09 | 0.83   | 0.02 | 1.63   | 0.01 | 3.32   | 0.14 | -0.01 | 0.04 | 0.22  | 0.14 |
| GKF01_mount4_1102_grain-1@43 | 2.38E+09 | -8.56  | 0.02 | -15.36 | 0.01 | -27.57 | 0.13 | -0.62 | 0.04 | 1.42  | 0.13 |
| GKF01_mount4_1102_grain-1@44 | 2.38E+09 | -7.33  | 0.02 | -13.43 | 0.02 | -24.09 | 0.13 | -0.39 | 0.05 | 1.28  | 0.13 |
| GKF01_mount4_1102_grain-1@45 | 2.41E+09 | -11.48 | 0.02 | -20.50 | 0.01 | -36.68 | 0.16 | -0.87 | 0.05 | 1.91  | 0.16 |
| GKF01_mount4_1102_grain-1@46 | 2.38E+09 | -11.34 | 0.02 | -20.28 | 0.01 | -36.39 | 0.15 | -0.85 | 0.05 | 1.79  | 0.15 |
| GKF01_mount4_1102_grain-1@47 | 2.37E+09 | -11.45 | 0.02 | -20.48 | 0.01 | -36.75 | 0.15 | -0.85 | 0.05 | 1.80  | 0.15 |

|                              |          |        |      |        |      |        |      |       |      |      |      |
|------------------------------|----------|--------|------|--------|------|--------|------|-------|------|------|------|
| GKF01_mount4_1102_grain-1@48 | 2.37E+09 | -11.03 | 0.03 | -19.46 | 0.01 | -34.62 | 0.15 | -0.96 | 0.05 | 2.02 | 0.15 |
| son@21                       | 2.42E+09 | 0.80   | 0.03 | 1.62   | 0.01 | 3.39   | 0.16 | -0.04 | 0.05 | 0.31 | 0.16 |
| son@22                       | 2.41E+09 | 0.84   | 0.02 | 1.67   | 0.01 | 3.50   | 0.15 | -0.02 | 0.04 | 0.33 | 0.15 |
| GKF01_mount4_1102_grain-1@49 | 2.38E+09 | -11.32 | 0.03 | -20.41 | 0.01 | -36.45 | 0.14 | -0.75 | 0.05 | 1.98 | 0.14 |
| GKF01_mount4_1102_grain-1@50 | 2.25E+09 | -11.20 | 0.02 | -20.39 | 0.01 | -36.89 | 0.15 | -0.65 | 0.04 | 1.49 | 0.15 |
| GKF01_mount4_1102_grain-1@51 | 2.37E+09 | -11.10 | 0.02 | -19.91 | 0.01 | -35.65 | 0.15 | -0.80 | 0.04 | 1.84 | 0.15 |
| GKF01_mount4_1102_grain-1@52 | 2.41E+09 | -10.97 | 0.02 | -19.53 | 0.01 | -34.92 | 0.14 | -0.86 | 0.04 | 1.85 | 0.14 |
| GKF01_mount4_1102_grain-1@53 | 2.38E+09 | -11.45 | 0.02 | -20.32 | 0.01 | -36.48 | 0.15 | -0.93 | 0.05 | 1.78 | 0.15 |
| GKF01_mount4_1102_grain-1@54 | 2.34E+09 | -11.21 | 0.02 | -20.16 | 0.01 | -36.21 | 0.16 | -0.78 | 0.04 | 1.75 | 0.16 |
| son@23                       | 2.41E+09 | 0.78   | 0.02 | 1.55   | 0.01 | 3.08   | 0.15 | -0.02 | 0.05 | 0.13 | 0.15 |
| son@24                       | 2.41E+09 | 0.82   | 0.02 | 1.53   | 0.01 | 3.34   | 0.15 | 0.03  | 0.04 | 0.43 | 0.15 |
| son@25                       | 2.41E+09 | 0.81   | 0.02 | 1.59   | 0.01 | 3.05   | 0.16 | -0.01 | 0.04 | 0.03 | 0.16 |
| son@26                       | 2.39E+09 | 0.78   | 0.02 | 1.58   | 0.02 | 3.26   | 0.13 | -0.03 | 0.05 | 0.26 | 0.13 |
| son@27                       | 2.39E+09 | 0.82   | 0.02 | 1.59   | 0.02 | 3.23   | 0.13 | 0.00  | 0.05 | 0.20 | 0.13 |
| son@28                       | 2.38E+09 | 0.82   | 0.02 | 1.60   | 0.02 | 3.14   | 0.13 | 0.00  | 0.05 | 0.10 | 0.13 |
| son@29                       | 2.38E+09 | 0.91   | 0.02 | 1.67   | 0.02 | 3.35   | 0.13 | 0.05  | 0.05 | 0.17 | 0.13 |
| GKF01_mount4_1102_grain-1@55 | 2.35E+09 | -10.26 | 0.03 | -18.33 | 0.02 | -32.94 | 0.13 | -0.78 | 0.05 | 1.60 | 0.13 |
| GKF01_mount4_1102_grain-1@56 | 2.29E+09 | -11.07 | 0.03 | -19.93 | 0.01 | -35.67 | 0.13 | -0.76 | 0.06 | 1.86 | 0.13 |
| GKF01_mount4_1102_grain-1@57 | 2.32E+09 | -10.88 | 0.03 | -19.71 | 0.02 | -35.50 | 0.14 | -0.68 | 0.06 | 1.62 | 0.14 |
| GKF01_mount4_1102_grain-1@58 | 2.31E+09 | -11.35 | 0.02 | -20.39 | 0.02 | -36.54 | 0.13 | -0.80 | 0.05 | 1.85 | 0.13 |
| GKF01_mount4_1102_grain-1@59 | 2.32E+09 | -11.05 | 0.02 | -19.55 | 0.02 | -34.84 | 0.14 | -0.94 | 0.05 | 1.98 | 0.14 |
| GKF01_mount4_1102_grain-1@60 | 2.20E+09 | -10.71 | 0.03 | -19.54 | 0.02 | -35.03 | 0.13 | -0.60 | 0.06 | 1.76 | 0.13 |
| son@30                       | 2.36E+09 | 0.88   | 0.02 | 1.62   | 0.02 | 3.52   | 0.15 | 0.04  | 0.05 | 0.44 | 0.15 |
| son@31                       | 2.38E+09 | 0.81   | 0.02 | 1.58   | 0.02 | 3.19   | 0.13 | 0.00  | 0.05 | 0.19 | 0.13 |
| GKF01_mount4_1102_grain-1@61 | 2.30E+09 | -11.29 | 0.03 | -20.26 | 0.02 | -36.51 | 0.14 | -0.80 | 0.05 | 1.63 | 0.14 |
| GKF01_mount4_1102_grain-1@62 | 2.29E+09 | -9.83  | 0.02 | -17.67 | 0.03 | -31.49 | 0.15 | -0.69 | 0.06 | 1.82 | 0.15 |
| GKF01_mount4_1102_grain-1@63 | 2.30E+09 | -11.37 | 0.02 | -20.40 | 0.02 | -36.44 | 0.13 | -0.81 | 0.05 | 1.96 | 0.13 |
| GKF01_mount4_1102_grain-1@64 | 2.25E+09 | -10.26 | 0.02 | -18.50 | 0.02 | -33.31 | 0.14 | -0.69 | 0.05 | 1.56 | 0.14 |
| GKF01_mount4_1102_grain-1@65 | 2.28E+09 | -10.29 | 0.02 | -18.53 | 0.02 | -33.81 | 0.15 | -0.71 | 0.05 | 1.10 | 0.15 |
| GKF01_mount4_1102_grain-1@66 | 2.27E+09 | -10.65 | 0.02 | -19.06 | 0.02 | -34.62 | 0.13 | -0.79 | 0.05 | 1.27 | 0.13 |



|                              |          |        |      |        |      |        |      |       |      |      |      |
|------------------------------|----------|--------|------|--------|------|--------|------|-------|------|------|------|
| son@32                       | 2.35E+09 | 0.84   | 0.03 | 1.64   | 0.02 | 3.30   | 0.13 | -0.01 | 0.06 | 0.18 | 0.13 |
| son@33                       | 2.35E+09 | 0.79   | 0.02 | 1.59   | 0.02 | 3.18   | 0.13 | -0.03 | 0.05 | 0.16 | 0.13 |
| GKF01_mount4_1102_grain-1@67 | 2.29E+09 | -9.17  | 0.02 | -16.42 | 0.02 | -29.54 | 0.13 | -0.67 | 0.05 | 1.44 | 0.13 |
| GKF01_mount4_1102_grain-1@68 | 2.29E+09 | -11.33 | 0.03 | -20.34 | 0.02 | -36.40 | 0.13 | -0.80 | 0.06 | 1.89 | 0.13 |
| GKF01_mount4_1102_grain-1@69 | 2.24E+09 | -10.78 | 0.02 | -19.53 | 0.02 | -35.06 | 0.13 | -0.68 | 0.05 | 1.72 | 0.13 |
| GKF01_mount4_1102_grain-1@70 | 2.27E+09 | -10.53 | 0.02 | -19.25 | 0.02 | -34.47 | 0.13 | -0.57 | 0.05 | 1.78 | 0.13 |
| GKF01_mount4_1102_grain-1@71 | 2.26E+09 | -10.68 | 0.03 | -19.07 | 0.02 | -34.01 | 0.13 | -0.81 | 0.06 | 1.91 | 0.13 |
| GKF01_mount4_1102_grain-1@72 | 2.32E+09 | -11.62 | 0.03 | -20.65 | 0.02 | -36.82 | 0.13 | -0.93 | 0.05 | 2.05 | 0.13 |
| GKF01_mount4_1102_grain-1@73 | 2.26E+09 | -10.40 | 0.03 | -18.71 | 0.02 | -33.64 | 0.18 | -0.72 | 0.06 | 1.60 | 0.18 |
| son@34                       | 2.34E+09 | 0.82   | 0.02 | 1.62   | 0.02 | 3.08   | 0.16 | -0.01 | 0.05 | 0.01 | 0.16 |
| son@35                       | 2.33E+09 | 0.82   | 0.02 | 1.58   | 0.02 | 3.34   | 0.13 | 0.01  | 0.05 | 0.33 | 0.13 |
| son@36                       | 2.33E+09 | 0.85   | 0.02 | 1.63   | 0.02 | 3.29   | 0.15 | 0.02  | 0.05 | 0.20 | 0.15 |
| son@37                       | 2.33E+09 | 0.82   | 0.02 | 1.63   | 0.02 | 3.16   | 0.13 | -0.02 | 0.05 | 0.06 | 0.13 |

GKF01\_mount4\_Grain3 and disseminated

|        |          |       |      |       |      |       |      |       |      |        |      |
|--------|----------|-------|------|-------|------|-------|------|-------|------|--------|------|
| son@28 | 2.36E+09 | 0.76  | 0.02 | 1.54  | 0.01 | 2.96  | 0.14 | -0.03 | 0.05 | 0.03   | 0.14 |
| son@29 | 2.33E+09 | 0.84  | 0.02 | 1.61  | 0.01 | 3.49  | 0.15 | 0.01  | 0.05 | 0.42   | 0.15 |
| son@30 | 2.27E+09 | 0.85  | 0.02 | 1.63  | 0.01 | 3.16  | 0.14 | 0.02  | 0.04 | 0.06   | 0.14 |
| son@31 | 2.24E+09 | 0.87  | 0.02 | 1.67  | 0.01 | 3.36  | 0.15 | 0.01  | 0.05 | 0.18   | 0.15 |
| freo@3 | 2.22E+09 | -2.26 | 0.03 | -4.50 | 0.01 | -8.61 | 0.14 | 0.06  | 0.05 | -0.09  | 0.14 |
| #4@1   | 2.12E+09 | 11.73 | 0.02 | 11.86 | 0.01 | 16.44 | 0.15 | 5.64  | 0.05 | -6.21  | 0.15 |
| #4@2   | 2.12E+09 | 11.69 | 0.02 | 11.79 | 0.01 | 16.31 | 0.16 | 5.63  | 0.05 | -6.21  | 0.16 |
| #4@3   | 2.23E+09 | 17.42 | 0.02 | 17.12 | 0.01 | 22.67 | 0.14 | 8.64  | 0.05 | -10.10 | 0.14 |
| #4@4   | 2.21E+09 | 17.49 | 0.02 | 16.97 | 0.01 | 22.19 | 0.15 | 8.79  | 0.05 | -10.31 | 0.15 |
| #4@5   | 2.20E+09 | 14.32 | 0.04 | 12.54 | 0.05 | 15.01 | 0.15 | 7.88  | 0.10 | -8.94  | 0.15 |
| #4@6   | 2.14E+09 | 15.80 | 0.03 | 15.46 | 0.01 | 20.52 | 0.15 | 7.87  | 0.06 | -9.06  | 0.15 |
| #4@7   | 2.16E+09 | 13.69 | 0.03 | 14.21 | 0.01 | 19.96 | 0.15 | 6.40  | 0.05 | -7.22  | 0.15 |
| freo@4 | 2.24E+09 | 0.78  | 0.02 | 1.52  | 0.01 | 3.00  | 0.14 | 0.00  | 0.05 | 0.10   | 0.14 |

|        |          |        |      |        |      |        |      |       |      |        |      |
|--------|----------|--------|------|--------|------|--------|------|-------|------|--------|------|
| #4@8   | 2.22E+09 | 14.09  | 0.03 | 14.48  | 0.01 | 20.37  | 0.16 | 6.66  | 0.06 | -7.32  | 0.16 |
| #4@9   | 2.20E+09 | 14.94  | 0.02 | 15.16  | 0.01 | 20.95  | 0.14 | 7.16  | 0.05 | -8.04  | 0.14 |
| #4@10  | 2.14E+09 | 20.97  | 0.03 | 21.58  | 0.01 | 29.13  | 0.15 | 9.91  | 0.05 | -12.27 | 0.15 |
| #4@11  | 2.22E+09 | 13.80  | 0.02 | 13.78  | 0.01 | 18.63  | 0.15 | 6.73  | 0.04 | -7.71  | 0.15 |
| #4@12  | 2.19E+09 | 13.85  | 0.02 | 13.77  | 0.01 | 18.71  | 0.15 | 6.78  | 0.05 | -7.61  | 0.15 |
| #4@13  | 2.06E+09 | 15.54  | 0.04 | 14.64  | 0.03 | 18.69  | 0.17 | 8.02  | 0.08 | -9.32  | 0.17 |
| son@34 | 2.22E+09 | 0.82   | 0.02 | 1.55   | 0.01 | 3.28   | 0.14 | 0.02  | 0.05 | 0.32   | 0.14 |
| son@35 | 2.22E+09 | 0.84   | 0.02 | 1.58   | 0.01 | 3.14   | 0.14 | 0.02  | 0.05 | 0.13   | 0.14 |
| #4@14  | 2.17E+09 | 16.23  | 0.02 | 14.75  | 0.01 | 17.98  | 0.15 | 8.66  | 0.05 | -10.24 | 0.15 |
| #4@15  | 2.20E+09 | 12.98  | 0.02 | 13.05  | 0.01 | 18.02  | 0.15 | 6.28  | 0.05 | -6.93  | 0.15 |
| #4@16  | 2.08E+09 | 14.11  | 0.03 | 11.93  | 0.02 | 13.88  | 0.15 | 7.98  | 0.06 | -8.90  | 0.15 |
| #4@17  | 2.20E+09 | 13.60  | 0.03 | 13.69  | 0.01 | 18.87  | 0.15 | 6.57  | 0.06 | -7.30  | 0.15 |
| #4@18  | 2.23E+09 | 14.66  | 0.02 | 14.82  | 0.01 | 20.74  | 0.15 | 7.05  | 0.04 | -7.62  | 0.15 |
| #4@19  | 2.16E+09 | 11.67  | 0.02 | 11.45  | 0.01 | 15.67  | 0.16 | 5.79  | 0.05 | -6.19  | 0.16 |
| #4@20  | 2.05E+09 | 13.48  | 0.03 | 12.23  | 0.01 | 15.40  | 0.15 | 7.20  | 0.06 | -7.97  | 0.15 |
| son@36 | 2.21E+09 | 0.81   | 0.02 | 1.58   | 0.01 | 3.35   | 0.16 | 0.00  | 0.05 | 0.34   | 0.16 |
| son@37 | 2.22E+09 | 0.80   | 0.02 | 1.59   | 0.01 | 3.47   | 0.15 | -0.02 | 0.05 | 0.45   | 0.15 |
| #4@21  | 2.17E+09 | 8.26   | 0.03 | 6.26   | 0.01 | 6.66   | 0.15 | 5.04  | 0.05 | -5.27  | 0.15 |
| #4@22  | 2.22E+09 | 14.75  | 0.02 | 14.88  | 0.01 | 20.33  | 0.15 | 7.11  | 0.05 | -8.13  | 0.15 |
| #4@23  | 2.13E+09 | -10.33 | 0.03 | -19.04 | 0.01 | -33.79 | 0.15 | -0.48 | 0.06 | 2.07   | 0.15 |
| #4@24  | 2.17E+09 | 12.70  | 0.02 | 12.93  | 0.01 | 18.68  | 0.15 | 6.06  | 0.05 | -6.03  | 0.15 |
| #4@25  | 1.63E+08 | 10.85  | 0.13 | 10.10  | 0.05 | 5.72   | 0.50 | 5.66  | 0.27 | -13.56 | 0.50 |
| son@38 | 2.12E+09 | 0.76   | 0.02 | 1.56   | 0.01 | 3.30   | 0.18 | -0.04 | 0.05 | 0.33   | 0.18 |
| son@39 | 2.15E+09 | 0.80   | 0.03 | 1.62   | 0.01 | 3.00   | 0.17 | -0.03 | 0.07 | -0.09  | 0.17 |
| #4@26  | 2.08E+09 | -10.53 | 0.02 | -19.29 | 0.02 | -34.83 | 0.16 | -0.55 | 0.05 | 1.51   | 0.16 |
| #4@27  | 2.07E+09 | -10.80 | 0.03 | -19.72 | 0.02 | -35.58 | 0.19 | -0.59 | 0.06 | 1.54   | 0.19 |
| #4@28  | 2.04E+09 | -9.22  | 0.03 | -17.52 | 0.02 | -31.88 | 0.16 | -0.16 | 0.06 | 1.15   | 0.16 |
| #4@29  | 2.07E+09 | -9.34  | 0.03 | -17.59 | 0.01 | -32.04 | 0.16 | -0.25 | 0.06 | 1.11   | 0.16 |
| #4@30  | 2.07E+09 | -9.69  | 0.03 | -17.88 | 0.01 | -32.45 | 0.20 | -0.44 | 0.05 | 1.25   | 0.20 |
| #4@31  | 2.11E+09 | -10.87 | 0.02 | -19.77 | 0.01 | -35.58 | 0.16 | -0.63 | 0.05 | 1.65   | 0.16 |

|        |          |        |      |        |      |        |      |       |      |      |      |
|--------|----------|--------|------|--------|------|--------|------|-------|------|------|------|
| #4@32  | 2.14E+09 | -11.01 | 0.03 | -19.72 | 0.01 | -35.40 | 0.16 | -0.81 | 0.06 | 1.74 | 0.16 |
| #4@33  | 2.14E+09 | -9.65  | 0.02 | -17.33 | 0.02 | -31.03 | 0.16 | -0.69 | 0.05 | 1.63 | 0.16 |
| son@40 | 2.19E+09 | 0.85   | 0.03 | 1.67   | 0.01 | 3.39   | 0.17 | -0.01 | 0.06 | 0.21 | 0.17 |
| son@41 | 2.20E+09 | 0.86   | 0.02 | 1.62   | 0.01 | 3.15   | 0.17 | 0.02  | 0.05 | 0.06 | 0.17 |
| son@42 | 2.18E+09 | 0.87   | 0.03 | 1.66   | 0.01 | 3.29   | 0.18 | 0.01  | 0.05 | 0.13 | 0.18 |
| son@43 | 2.20E+09 | 0.86   | 0.03 | 1.68   | 0.01 | 3.32   | 0.17 | 0.00  | 0.06 | 0.13 | 0.17 |
| son@47 | 2.17E+09 | 0.85   | 0.03 | 1.57   | 0.01 | 3.10   | 0.17 | 0.04  | 0.05 | 0.12 | 0.17 |

Mount2\_gkf01

|         |          |       |      |       |      |       |      |       |      |       |      |
|---------|----------|-------|------|-------|------|-------|------|-------|------|-------|------|
| son-3@1 | 1.61E+09 | 0.65  | 0.20 | 1.52  | 0.13 | 3.06  | 0.39 | -0.14 | 0.42 | 0.17  | 0.39 |
| son-3@2 | 1.61E+09 | 0.73  | 0.18 | 1.54  | 0.34 | 2.99  | 0.73 | -0.07 | 0.51 | 0.06  | 0.73 |
| son-3@3 | 1.92E+09 | 0.81  | 0.18 | 1.52  | 0.20 | 2.98  | 0.32 | 0.03  | 0.41 | 0.08  | 0.32 |
| son4@1  | 1.59E+09 | 0.92  | 0.20 | 1.70  | 0.13 | 3.27  | 0.44 | 0.04  | 0.42 | 0.03  | 0.44 |
| son4@2  | 1.61E+09 | 0.79  | 0.19 | 1.63  | 0.34 | 2.74  | 0.71 | -0.05 | 0.52 | -0.36 | 0.71 |
| son4@3  | 1.91E+09 | 0.75  | 0.19 | 1.37  | 0.21 | 3.11  | 0.32 | 0.04  | 0.43 | 0.50  | 0.32 |
| son5@1  | 1.58E+09 | 0.74  | 0.20 | 1.62  | 0.13 | 2.92  | 0.44 | -0.09 | 0.42 | -0.16 | 0.44 |
| son5@2  | 1.59E+09 | 0.81  | 0.19 | 1.63  | 0.34 | 3.45  | 0.75 | -0.03 | 0.51 | 0.36  | 0.75 |
| son5@3  | 1.87E+09 | 0.81  | 0.17 | 1.57  | 0.20 | 3.42  | 0.50 | 0.01  | 0.40 | 0.44  | 0.50 |
| Freo1@1 | 1.59E+09 | 1.22  | 0.20 | 2.67  | 0.13 | 5.21  | 0.43 | -0.15 | 0.42 | 0.12  | 0.43 |
| Freo1@2 | 1.60E+09 | 1.29  | 0.19 | 2.62  | 0.34 | 5.26  | 0.73 | -0.06 | 0.51 | 0.28  | 0.73 |
| Freo1@3 | 1.89E+09 | 1.37  | 0.17 | 2.59  | 0.20 | 5.85  | 0.40 | 0.04  | 0.40 | 0.92  | 0.40 |
| Freo2@1 | 1.56E+09 | 1.46  | 0.20 | 2.73  | 0.14 | 5.62  | 0.54 | 0.05  | 0.42 | 0.42  | 0.54 |
| Freo2@2 | 1.59E+09 | 1.35  | 0.19 | 2.72  | 0.34 | 5.45  | 0.69 | -0.05 | 0.51 | 0.27  | 0.69 |
| Freo2@3 | 1.89E+09 | 1.49  | 0.18 | 2.76  | 0.20 | 6.63  | 0.40 | 0.07  | 0.41 | 1.38  | 0.40 |
| #2-1@1  | 1.40E+09 | 9.46  | 0.21 | 6.22  | 0.13 | 3.18  | 0.41 | 6.26  | 0.44 | -8.66 | 0.41 |
| #2-1@2  | 1.54E+09 | 10.37 | 0.18 | 7.49  | 0.31 | 5.51  | 0.66 | 6.52  | 0.47 | -8.76 | 0.66 |
| #2-1@3  | 1.75E+09 | 11.84 | 0.17 | 10.10 | 0.16 | 11.22 | 0.35 | 6.65  | 0.38 | -8.06 | 0.35 |

|        |          |       |      |       |      |       |      |       |      |        |      |
|--------|----------|-------|------|-------|------|-------|------|-------|------|--------|------|
| #2-2@1 | 1.36E+09 | 9.14  | 0.22 | 5.24  | 0.17 | 1.19  | 0.50 | 6.44  | 0.47 | -8.80  | 0.50 |
| #2-2@2 | 1.53E+09 | 9.85  | 0.18 | 6.52  | 0.32 | 3.25  | 0.73 | 6.50  | 0.49 | -9.17  | 0.73 |
| #2-2@3 | 1.97E+09 | 9.74  | 0.17 | 6.34  | 0.20 | 3.90  | 0.48 | 6.47  | 0.40 | -8.19  | 0.48 |
| #2-3@1 | 5.70E+08 | 9.10  | 0.22 | 5.10  | 0.07 | 0.54  | 0.49 | 6.48  | 0.45 | -9.16  | 0.49 |
| #2-3@2 | 7.71E+08 | 10.75 | 0.17 | 7.29  | 0.29 | 3.82  | 0.76 | 7.00  | 0.46 | -10.08 | 0.76 |
| #2-3@3 | 3.49E+08 | 12.70 | 0.19 | 11.54 | 0.16 | 12.74 | 0.61 | 6.78  | 0.42 | -9.31  | 0.61 |
| #2-4@1 | 3.71E+06 |       |      |       |      |       |      |       |      |        |      |
| #2-4@2 | 3.75E+05 |       |      |       |      |       |      |       |      |        |      |
| #2-4@3 | 8.47E+05 |       |      |       |      |       |      |       |      |        |      |
| son6@1 | 1.57E+09 | 0.80  | 0.20 | 1.71  | 0.14 | 3.08  | 0.49 | -0.08 | 0.43 | -0.18  | 0.49 |
| son6@2 | 1.59E+09 | 0.96  | 0.21 | 1.63  | 0.34 | 3.87  | 0.82 | 0.13  | 0.54 | 0.78   | 0.82 |
| son6@3 | 1.90E+09 | 0.82  | 0.17 | 1.64  | 0.20 | 3.45  | 0.43 | -0.03 | 0.40 | 0.33   | 0.43 |
| son7@1 | 1.58E+09 | 0.80  | 0.20 | 1.64  | 0.14 | 3.54  | 0.37 | -0.05 | 0.43 | 0.42   | 0.37 |
| son7@2 | 1.62E+09 | 0.85  | 0.19 | 1.71  | 0.34 | 3.35  | 0.68 | -0.03 | 0.51 | 0.10   | 0.68 |
| son7@3 | 1.90E+09 | 0.90  | 0.18 | 1.74  | 0.20 | 3.37  | 0.44 | 0.01  | 0.41 | 0.07   | 0.44 |
| #2-5@1 | 1.02E+08 | 7.64  | 0.50 | 5.21  | 0.11 | 1.82  | 1.09 | 4.96  | 1.02 | -8.10  | 1.09 |
| #2-5@2 | 1.40E+08 | 8.64  | 0.43 | 6.78  | 0.29 | 5.53  | 1.06 | 5.16  | 0.91 | -7.39  | 1.06 |
| #2-5@3 | 1.13E+08 | 10.79 | 0.83 | 11.48 | 0.21 | 14.94 | 1.03 | 4.89  | 1.67 | -6.99  | 1.03 |
| #2-6@1 | 8.07E+08 | 9.12  | 0.20 | 4.95  | 0.09 | 0.45  | 0.42 | 6.57  | 0.41 | -8.98  | 0.42 |
| #2-6@2 | 1.08E+09 | 10.67 | 0.18 | 8.07  | 0.29 | 6.55  | 0.65 | 6.52  | 0.46 | -8.83  | 0.65 |
| #2-6@3 | 5.50E+08 | 13.02 | 0.26 | 12.10 | 0.32 | 14.80 | 0.56 | 6.81  | 0.62 | -8.31  | 0.56 |
| #2-7@1 | 4.11E+05 |       |      |       |      |       |      |       |      |        |      |
| #2-7@2 | 4.14E+05 |       |      |       |      |       |      |       |      |        |      |
| #2-7@3 | 3.72E+05 |       |      |       |      |       |      |       |      |        |      |
| #2-8@1 | 1.42E+08 | 8.20  | 0.77 | 4.84  | 0.12 | -1.35 | 1.30 | 5.71  | 1.55 | -10.57 | 1.30 |
| #2-8@2 | 8.32E+07 | 10.01 | 0.81 | 9.04  | 0.33 | 9.12  | 1.29 | 5.37  | 1.65 | -8.13  | 1.29 |
| #2-8@3 | 8.29E+07 | 13.79 | 0.71 | 12.40 | 0.24 | 16.60 | 1.19 | 7.42  | 1.44 | -7.09  | 1.19 |
| son8@1 | 1.55E+09 | 0.82  | 0.20 | 1.59  | 0.13 | 3.48  | 0.42 | 0.00  | 0.42 | 0.46   | 0.42 |
| son8@2 | 1.58E+09 | 0.97  | 0.18 | 1.85  | 0.35 | 4.20  | 0.73 | 0.02  | 0.51 | 0.67   | 0.73 |
| son8@3 | 1.85E+09 | 0.82  | 0.17 | 1.74  | 0.21 | 3.81  | 0.45 | -0.08 | 0.40 | 0.49   | 0.45 |

|         |          |       |      |       |      |       |      |       |      |       |      |
|---------|----------|-------|------|-------|------|-------|------|-------|------|-------|------|
| son9@1  | 1.54E+09 | 0.91  | 0.21 | 1.70  | 0.13 | 3.66  | 0.33 | 0.04  | 0.44 | 0.43  | 0.33 |
| son9@2  | 1.56E+09 | 0.84  | 0.19 | 1.67  | 0.34 | 3.64  | 0.68 | -0.02 | 0.52 | 0.47  | 0.68 |
| son9@3  | 1.85E+09 | 0.81  | 0.17 | 1.52  | 0.20 | 3.02  | 0.43 | 0.03  | 0.41 | 0.14  | 0.43 |
| #2-9@1  | 1.39E+09 | 14.12 | 0.20 | 14.27 | 0.16 | 18.96 | 0.45 | 6.80  | 0.43 | -8.33 | 0.45 |
| #2-9@2  | 1.44E+09 | 13.75 | 0.21 | 13.54 | 0.36 | 17.96 | 0.78 | 6.80  | 0.55 | -7.91 | 0.78 |
| #2-9@3  | 1.89E+09 | 14.13 | 0.17 | 14.07 | 0.17 | 19.06 | 0.32 | 6.91  | 0.38 | -7.85 | 0.32 |
| #2-10@1 | 1.41E+09 | 14.10 | 0.21 | 14.01 | 0.17 | 18.61 | 0.51 | 6.91  | 0.46 | -8.16 | 0.51 |
| #2-10@2 | 1.60E+09 | 14.33 | 0.19 | 14.09 | 0.34 | 18.59 | 0.67 | 7.10  | 0.52 | -8.36 | 0.67 |
| #2-10@3 | 2.04E+09 | 14.46 | 0.18 | 14.47 | 0.21 | 19.70 | 0.43 | 7.04  | 0.41 | -7.97 | 0.43 |
| #2-11@1 | 2.78E+08 | 12.62 | 0.23 | 11.98 | 0.17 | 14.01 | 0.75 | 6.47  | 0.49 | -8.89 | 0.75 |
| #2-11@2 | 4.33E+08 | 14.03 | 0.18 | 13.62 | 0.29 | 18.06 | 0.76 | 7.04  | 0.46 | -7.97 | 0.76 |
| #2-11@3 | 4.32E+08 | 15.81 | 0.24 | 17.47 | 0.16 | 25.92 | 0.56 | 6.85  | 0.50 | -7.54 | 0.56 |
| #2-12@1 | 1.13E+09 | 13.75 | 0.21 | 13.42 | 0.16 | 18.03 | 0.47 | 6.87  | 0.45 | -7.63 | 0.47 |
| #2-12@2 | 1.40E+09 | 13.76 | 0.19 | 13.45 | 0.34 | 18.03 | 0.71 | 6.85  | 0.52 | -7.68 | 0.71 |
| #2-12@3 | 1.88E+09 | 13.88 | 0.17 | 13.47 | 0.18 | 17.97 | 0.35 | 6.96  | 0.38 | -7.78 | 0.35 |
| son10@1 | 1.55E+09 | 0.84  | 0.20 | 1.55  | 0.15 | 3.14  | 0.35 | 0.04  | 0.44 | 0.20  | 0.35 |
| son10@2 | 1.54E+09 | 0.87  | 0.20 | 1.55  | 0.35 | 2.76  | 0.75 | 0.07  | 0.54 | -0.19 | 0.75 |
| son10@3 | 1.85E+09 | 0.90  | 0.18 | 1.67  | 0.20 | 3.11  | 0.49 | 0.04  | 0.41 | -0.06 | 0.49 |
| son11@1 | 1.55E+09 | 0.83  | 0.20 | 1.56  | 0.14 | 3.18  | 0.34 | 0.03  | 0.42 | 0.22  | 0.34 |
| son11@2 | 1.56E+09 | 0.78  | 0.19 | 1.68  | 0.34 | 3.59  | 0.71 | -0.08 | 0.52 | 0.39  | 0.71 |
| son11@3 | 1.83E+09 | 0.93  | 0.18 | 1.59  | 0.21 | 3.33  | 0.36 | 0.11  | 0.41 | 0.31  | 0.36 |
| #2-13@1 | 5.93E+08 | 12.92 | 0.24 | 12.06 | 0.22 | 15.37 | 0.81 | 6.73  | 0.52 | -7.66 | 0.81 |
| #2-13@2 | 1.06E+09 | 12.73 | 0.18 | 11.83 | 0.30 | 15.56 | 0.69 | 6.65  | 0.48 | -7.04 | 0.69 |
| #2-13@3 | 1.58E+09 | 13.74 | 0.17 | 13.32 | 0.18 | 17.21 | 0.37 | 6.90  | 0.39 | -8.26 | 0.37 |
| #2-14@1 | 1.47E+09 | 14.17 | 0.21 | 14.34 | 0.17 | 19.09 | 0.42 | 6.81  | 0.46 | -8.34 | 0.42 |
| #2-14@2 | 1.54E+09 | 13.82 | 0.20 | 13.69 | 0.35 | 18.95 | 0.87 | 6.79  | 0.54 | -7.22 | 0.87 |
| #2-14@3 | 1.97E+09 | 13.49 | 0.18 | 12.96 | 0.20 | 16.15 | 0.43 | 6.83  | 0.41 | -8.60 | 0.43 |
| #2-15@1 | 1.12E+09 | 9.10  | 0.36 | 8.35  | 0.43 | 10.31 | 0.79 | 4.81  | 0.85 | -5.62 | 0.79 |
| #2-15@2 | 1.38E+09 | 4.91  | 0.21 | 3.61  | 0.37 | 3.63  | 0.72 | 3.06  | 0.56 | -3.24 | 0.72 |
| #2-15@3 | 1.31E+09 | 5.72  | 0.17 | 5.58  | 0.16 | 7.18  | 0.38 | 2.85  | 0.38 | -3.45 | 0.38 |

|         |          |      |      |      |      |      |      |       |      |       |      |
|---------|----------|------|------|------|------|------|------|-------|------|-------|------|
| son12@1 | 1.55E+09 | 0.84 | 0.20 | 1.59 | 0.15 | 3.24 | 0.32 | 0.02  | 0.43 | 0.21  | 0.32 |
| son12@2 | 1.57E+09 | 0.70 | 0.18 | 1.36 | 0.34 | 2.71 | 0.67 | 0.00  | 0.51 | 0.13  | 0.67 |
| son12@3 | 1.87E+09 | 0.77 | 0.17 | 1.63 | 0.19 | 3.42 | 0.38 | -0.07 | 0.40 | 0.32  | 0.38 |
| son13@1 | 1.54E+09 | 0.85 | 0.20 | 1.52 | 0.14 | 2.82 | 0.43 | 0.06  | 0.43 | -0.06 | 0.43 |
| son13@2 | 1.56E+09 | 0.66 | 0.19 | 1.31 | 0.33 | 2.51 | 0.64 | -0.02 | 0.51 | 0.02  | 0.64 |
| son13@3 | 1.89E+09 | 0.88 | 0.17 | 1.60 | 0.20 | 3.29 | 0.45 | 0.05  | 0.40 | 0.26  | 0.45 |
| son14@1 | 1.57E+09 | 0.89 | 0.21 | 1.64 | 0.14 | 3.12 | 0.51 | 0.04  | 0.44 | -0.01 | 0.51 |
| son14@2 | 1.57E+09 | 0.80 | 0.19 | 1.59 | 0.34 | 3.45 | 0.68 | -0.01 | 0.51 | 0.43  | 0.68 |
| son14@3 | 1.87E+09 | 0.69 | 0.18 | 1.58 | 0.21 | 3.10 | 0.41 | -0.12 | 0.42 | 0.11  | 0.41 |
| son15@1 | 1.55E+09 | 0.90 | 0.21 | 1.59 | 0.14 | 3.30 | 0.52 | 0.09  | 0.43 | 0.28  | 0.52 |
| son15@2 | 1.57E+09 | 1.02 | 0.20 | 1.77 | 0.33 | 3.89 | 0.74 | 0.11  | 0.53 | 0.52  | 0.74 |
| son15@3 | 1.84E+09 | 0.89 | 0.17 | 1.77 | 0.20 | 3.38 | 0.40 | -0.02 | 0.41 | 0.01  | 0.40 |

Mount1gkf01

|        | 32Scouts | d33S VCDT | unc  | d34S VCDT | unc  | d36S VCDT | unc  | D33S VCDT | unc  | D36S VCDT | Unc  |
|--------|----------|-----------|------|-----------|------|-----------|------|-----------|------|-----------|------|
| son2@1 | 1.91E+09 | 0.59      | 0.10 | 1.31      | 0.12 | 2.53      | 0.30 | -0.08     | 0.11 | 0.04      | 0.30 |
| son2@2 | 1.97E+09 | 0.71      | 0.11 | 1.52      | 0.17 | 2.93      | 0.38 | -0.07     | 0.14 | 0.05      | 0.38 |
| son2@3 | 2.33E+09 | 0.71      | 0.10 | 1.51      | 0.14 | 3.26      | 0.29 | -0.07     | 0.12 | 0.39      | 0.29 |
| son3@1 | 1.89E+09 | 0.81      | 0.11 | 1.64      | 0.12 | 3.61      | 0.33 | -0.03     | 0.13 | 0.49      | 0.33 |
| son3@2 | 1.94E+09 | 0.90      | 0.11 | 1.74      | 0.17 | 3.72      | 0.42 | 0.00      | 0.14 | 0.40      | 0.42 |
| son3@3 | 2.34E+09 | 0.86      | 0.09 | 1.62      | 0.15 | 3.37      | 0.35 | 0.03      | 0.12 | 0.29      | 0.35 |
| son4@1 | 1.88E+09 | 0.76      | 0.11 | 1.55      | 0.14 | 3.18      | 0.32 | -0.03     | 0.13 | 0.23      | 0.32 |
| son4@2 | 1.91E+09 | 0.85      | 0.11 | 1.75      | 0.19 | 3.51      | 0.50 | -0.05     | 0.15 | 0.17      | 0.50 |
| son4@3 | 2.32E+09 | 0.92      | 0.08 | 1.73      | 0.14 | 3.82      | 0.36 | 0.02      | 0.10 | 0.52      | 0.36 |
| son5@1 | 1.88E+09 | 0.78      | 0.10 | 1.63      | 0.14 | 3.41      | 0.32 | -0.06     | 0.12 | 0.31      | 0.32 |
| son5@2 | 1.93E+09 | 0.72      | 0.11 | 1.59      | 0.18 | 3.37      | 0.47 | -0.10     | 0.14 | 0.35      | 0.47 |
| son5@3 | 2.37E+09 | 0.79      | 0.08 | 1.56      | 0.14 | 3.40      | 0.31 | -0.01     | 0.11 | 0.43      | 0.31 |
| #1-1@1 | 1.85E+09 | 1.65      | 0.13 | -0.23     | 0.21 | -0.89     | 0.39 | 1.77      | 0.17 | -0.45     | 0.39 |
| #1-1@2 | 2.05E+09 | 3.62      | 0.04 | 1.00      | 0.16 | -0.43     | 0.39 | 3.11      | 0.10 | -2.32     | 0.39 |
| #1-1@3 | 2.57E+09 | 4.29      | 0.09 | 1.27      | 0.22 | -0.45     | 0.49 | 3.64      | 0.14 | -2.86     | 0.49 |

|         |          |       |      |       |      |       |      |       |      |       |      |
|---------|----------|-------|------|-------|------|-------|------|-------|------|-------|------|
| #1-3@1  | 1.77E+09 | 7.59  | 0.10 | 3.92  | 0.12 | 2.98  | 0.34 | 5.57  | 0.12 | -4.48 | 0.34 |
| #1-3@2  | 1.93E+09 | 7.16  | 0.12 | 3.30  | 0.18 | 1.51  | 0.43 | 5.46  | 0.15 | -4.77 | 0.43 |
| #1-3@3  | 2.43E+09 | 7.02  | 0.09 | 3.04  | 0.13 | 1.14  | 0.37 | 5.46  | 0.12 | -4.63 | 0.37 |
| #1-4@1  | 1.82E+09 | 6.17  | 0.08 | -0.59 | 0.12 | -7.17 | 0.33 | 6.48  | 0.10 | -6.04 | 0.33 |
| #1-4@2  | 2.00E+09 | 6.81  | 0.11 | 0.04  | 0.15 | -6.47 | 0.39 | 6.79  | 0.14 | -6.55 | 0.39 |
| #1-4@3  | 2.52E+09 | 7.05  | 0.05 | 1.22  | 0.10 | -3.89 | 0.40 | 6.42  | 0.07 | -6.21 | 0.40 |
| #1-5@1  | 1.80E+09 | 4.37  | 0.09 | -1.82 | 0.07 | -8.22 | 0.26 | 5.31  | 0.09 | -4.77 | 0.26 |
| #1-5@2  | 2.04E+09 | 5.06  | 0.08 | -1.57 | 0.15 | -8.09 | 0.32 | 5.87  | 0.11 | -5.11 | 0.32 |
| #1-5@3  | 2.58E+09 | 6.12  | 0.05 | -0.21 | 0.05 | -6.03 | 0.22 | 6.22  | 0.05 | -5.63 | 0.22 |
| #1-6@1  | 1.83E+09 | 6.37  | 0.10 | 0.01  | 0.15 | -5.28 | 0.32 | 6.37  | 0.13 | -5.29 | 0.32 |
| #1-6@2  | 2.10E+09 | 7.52  | 0.05 | 1.72  | 0.05 | -2.10 | 0.27 | 6.64  | 0.06 | -5.36 | 0.27 |
| #1-6@3  | 2.61E+09 | 8.12  | 0.06 | 3.51  | 0.14 | 1.32  | 0.44 | 6.32  | 0.09 | -5.36 | 0.44 |
| Son6@1  | 1.88E+09 | 0.88  | 0.10 | 1.73  | 0.14 | 3.89  | 0.27 | -0.01 | 0.12 | 0.60  | 0.27 |
| Son6@2  | 1.90E+09 | 0.67  | 0.11 | 1.39  | 0.19 | 2.80  | 0.30 | -0.04 | 0.15 | 0.15  | 0.30 |
| Son6@3  | 2.36E+09 | 0.83  | 0.09 | 1.65  | 0.14 | 3.23  | 0.30 | -0.02 | 0.11 | 0.10  | 0.30 |
| son7@1  | 1.88E+09 | 0.82  | 0.10 | 1.58  | 0.13 | 2.87  | 0.34 | 0.01  | 0.12 | -0.12 | 0.34 |
| son7@2  | 1.95E+09 | 0.89  | 0.10 | 1.64  | 0.17 | 3.42  | 0.40 | 0.05  | 0.13 | 0.31  | 0.40 |
| son7@3  | 2.34E+09 | 0.76  | 0.08 | 1.51  | 0.14 | 3.14  | 0.30 | -0.01 | 0.11 | 0.28  | 0.30 |
| son9@1  | 1.89E+09 | 0.91  | 0.10 | 1.71  | 0.14 | 3.57  | 0.28 | 0.02  | 0.12 | 0.31  | 0.28 |
| son9@2  | 1.92E+09 | 0.73  | 0.11 | 1.60  | 0.19 | 3.69  | 0.49 | -0.09 | 0.15 | 0.66  | 0.49 |
| son9@3  | 2.35E+09 | 0.86  | 0.09 | 1.56  | 0.15 | 2.67  | 0.38 | 0.06  | 0.12 | -0.30 | 0.38 |
| son10@1 | 1.88E+09 | 0.93  | 0.10 | 1.67  | 0.14 | 3.12  | 0.33 | 0.07  | 0.13 | -0.04 | 0.33 |
| son10@2 | 1.94E+09 | 0.95  | 0.10 | 1.61  | 0.17 | 3.98  | 0.42 | 0.12  | 0.13 | 0.93  | 0.42 |
| son10@3 | 2.33E+09 | 0.73  | 0.08 | 1.56  | 0.14 | 3.32  | 0.37 | -0.07 | 0.11 | 0.36  | 0.37 |
| #1-7@1  | 1.82E+09 | 9.49  | 0.10 | 8.25  | 0.12 | 9.50  | 0.49 | 5.25  | 0.12 | -6.23 | 0.49 |
| #1-7@2  | 1.98E+09 | 10.92 | 0.05 | 10.11 | 0.03 | 12.12 | 0.25 | 5.72  | 0.05 | -7.17 | 0.25 |
| #1-7@3  | 2.58E+09 | 11.87 | 0.08 | 11.28 | 0.13 | 13.58 | 0.26 | 6.08  | 0.11 | -7.97 | 0.26 |
| #1-8@1  | 1.77E+09 | 9.19  | 0.18 | 7.44  | 0.25 | 7.79  | 0.43 | 5.37  | 0.22 | -6.39 | 0.43 |
| #1-8@2  | 2.03E+09 | 8.83  | 0.10 | 7.30  | 0.13 | 8.01  | 0.37 | 5.08  | 0.12 | -5.90 | 0.37 |
| #1-8@3  | 2.62E+09 | 10.16 | 0.05 | 8.69  | 0.07 | 9.95  | 0.25 | 5.69  | 0.07 | -6.62 | 0.25 |

|         |          |       |      |       |      |       |      |       |      |       |      |
|---------|----------|-------|------|-------|------|-------|------|-------|------|-------|------|
| #1-9@1  | 1.84E+09 | 11.63 | 0.13 | 16.16 | 0.23 | 27.41 | 0.49 | 3.34  | 0.18 | -3.52 | 0.49 |
| #1-9@2  | 2.00E+09 | 10.97 | 0.12 | 14.83 | 0.30 | 25.25 | 0.77 | 3.36  | 0.19 | -3.12 | 0.77 |
| #1-9@3  | 2.39E+09 | 12.70 | 0.06 | 15.19 | 0.05 | 22.87 | 0.22 | 4.91  | 0.07 | -6.19 | 0.22 |
| #1-10@1 | 1.76E+09 | 9.12  | 0.14 | 9.03  | 0.18 | 11.82 | 0.42 | 4.48  | 0.17 | -5.41 | 0.42 |
| #1-10@2 | 1.93E+09 | 9.43  | 0.08 | 9.69  | 0.14 | 13.33 | 0.42 | 4.45  | 0.11 | -5.17 | 0.42 |
| #1-10@3 | 2.38E+09 | 10.04 | 0.06 | 10.08 | 0.15 | 13.55 | 0.44 | 4.86  | 0.10 | -5.69 | 0.44 |
| son11@1 | 1.83E+09 | 0.86  | 0.12 | 1.50  | 0.15 | 2.87  | 0.33 | 0.09  | 0.15 | 0.02  | 0.33 |
| son11@2 | 1.94E+09 | 0.81  | 0.08 | 1.59  | 0.14 | 3.39  | 0.38 | -0.01 | 0.11 | 0.36  | 0.38 |
| son11@3 | 2.35E+09 | 0.76  | 0.09 | 1.49  | 0.16 | 2.99  | 0.45 | -0.01 | 0.12 | 0.16  | 0.45 |
| son12@1 | 1.87E+09 | 0.87  | 0.10 | 1.71  | 0.14 | 3.23  | 0.34 | -0.01 | 0.12 | -0.02 | 0.34 |
| son12@2 | 1.92E+09 | 0.80  | 0.10 | 1.45  | 0.18 | 2.88  | 0.34 | 0.05  | 0.14 | 0.13  | 0.34 |
| son12@3 | 2.33E+09 | 0.96  | 0.08 | 1.75  | 0.13 | 3.18  | 0.29 | 0.06  | 0.10 | -0.15 | 0.29 |
| son13@1 | 1.86E+09 | 0.85  | 0.09 | 1.77  | 0.14 | 3.27  | 0.32 | -0.06 | 0.12 | -0.09 | 0.32 |
| son13@2 | 1.93E+09 | 0.99  | 0.09 | 1.75  | 0.20 | 2.82  | 0.53 | 0.09  | 0.13 | -0.51 | 0.53 |
| son13@3 | 2.33E+09 | 0.91  | 0.09 | 1.76  | 0.14 | 3.30  | 0.34 | 0.00  | 0.11 | -0.05 | 0.34 |
| son14@1 | 1.88E+09 | 0.88  | 0.10 | 1.53  | 0.13 | 3.02  | 0.38 | 0.09  | 0.12 | 0.12  | 0.38 |
| son14@2 | 1.92E+09 | 0.93  | 0.11 | 1.69  | 0.20 | 3.20  | 0.41 | 0.06  | 0.15 | -0.01 | 0.41 |
| son14@3 | 2.33E+09 | 0.86  | 0.07 | 1.61  | 0.14 | 3.16  | 0.38 | 0.03  | 0.10 | 0.10  | 0.38 |

Mount1\_2nd set

|              |          |      |      |      |      |      |      |       |      |       |      |
|--------------|----------|------|------|------|------|------|------|-------|------|-------|------|
| son16rerun@1 | 1.82E+09 | 0.81 | 0.09 | 1.36 | 0.17 | 3.04 | 0.48 | 0.11  | 0.13 | 0.46  | 0.48 |
| son16rerun@2 | 1.91E+09 | 0.66 | 0.24 | 1.30 | 0.26 | 3.18 | 0.71 | -0.01 | 0.28 | 0.70  | 0.71 |
| son16rerun@3 | 2.31E+09 | 0.64 | 0.24 | 1.27 | 0.29 | 2.38 | 0.62 | -0.02 | 0.28 | -0.03 | 0.62 |
| son17rerun@1 | 1.85E+09 | 0.88 | 0.08 | 1.75 | 0.13 | 3.72 | 0.53 | -0.03 | 0.10 | 0.39  | 0.53 |
| son17rerun@2 | 1.90E+09 | 0.87 | 0.24 | 1.68 | 0.28 | 3.85 | 0.68 | 0.01  | 0.28 | 0.66  | 0.68 |
| son17rerun@3 | 2.34E+09 | 0.90 | 0.23 | 1.79 | 0.28 | 3.86 | 0.69 | -0.03 | 0.28 | 0.45  | 0.69 |
| son18rerun@1 | 1.86E+09 | 0.79 | 0.10 | 1.62 | 0.16 | 3.39 | 0.35 | -0.04 | 0.13 | 0.31  | 0.35 |



|              |          |       |      |       |      |       |      |       |      |       |      |
|--------------|----------|-------|------|-------|------|-------|------|-------|------|-------|------|
| son18rerun@2 | 1.90E+09 | 0.87  | 0.25 | 1.66  | 0.28 | 2.95  | 0.72 | 0.02  | 0.29 | -0.21 | 0.72 |
| son18rerun@3 | 2.32E+09 | 0.78  | 0.23 | 1.55  | 0.28 | 3.87  | 0.60 | -0.02 | 0.27 | 0.92  | 0.60 |
| son19rerun@1 | 1.84E+09 | 0.74  | 0.09 | 1.58  | 0.15 | 2.80  | 0.48 | -0.07 | 0.12 | -0.21 | 0.48 |
| son19rerun@2 | 1.89E+09 | 0.96  | 0.24 | 1.55  | 0.27 | 3.13  | 0.51 | 0.16  | 0.27 | 0.19  | 0.51 |
| son19rerun@3 | 2.30E+09 | 0.74  | 0.24 | 1.37  | 0.29 | 2.71  | 0.60 | 0.03  | 0.28 | 0.11  | 0.60 |
| Freo1@1      | 1.84E+09 | 1.61  | 0.10 | 2.97  | 0.15 | 6.50  | 0.38 | 0.08  | 0.12 | 0.86  | 0.38 |
| Freo1@2      | 1.88E+09 | 1.77  | 0.24 | 3.13  | 0.27 | 6.13  | 0.68 | 0.16  | 0.28 | 0.17  | 0.68 |
| Freo1@3      | 2.27E+09 | 1.74  | 0.23 | 3.30  | 0.27 | 7.54  | 0.57 | 0.05  | 0.27 | 1.27  | 0.57 |
| Freo2@1      | 1.84E+09 | 1.59  | 0.08 | 3.19  | 0.13 | 6.63  | 0.43 | -0.05 | 0.10 | 0.56  | 0.43 |
| Freo2@2      | 1.89E+09 | 1.84  | 0.24 | 3.33  | 0.27 | 6.30  | 0.57 | 0.13  | 0.28 | -0.04 | 0.57 |
| Freo2@3      | 2.27E+09 | 1.75  | 0.24 | 3.47  | 0.28 | 7.09  | 0.53 | -0.04 | 0.28 | 0.49  | 0.53 |
| #1-11@1      | 1.76E+09 | 6.93  | 0.07 | 0.92  | 0.12 | -4.04 | 0.32 | 6.46  | 0.09 | -5.78 | 0.32 |
| #1-11@2      | 1.83E+09 | 7.48  | 0.24 | 2.74  | 0.23 | -1.28 | 0.45 | 6.07  | 0.26 | -6.49 | 0.45 |
| #1-11@3      | 2.26E+09 | 8.11  | 0.23 | 4.39  | 0.26 | 2.68  | 0.50 | 5.86  | 0.27 | -5.67 | 0.50 |
| #1-12@1      | 1.77E+09 | 6.30  | 0.08 | 0.28  | 0.10 | -5.13 | 0.34 | 6.16  | 0.10 | -5.67 | 0.34 |
| #1-12@2      | 1.85E+09 | 6.51  | 0.24 | 0.50  | 0.28 | -5.90 | 0.55 | 6.25  | 0.28 | -6.85 | 0.55 |
| #1-12@3      | 2.32E+09 | 7.21  | 0.22 | 1.51  | 0.26 | -3.96 | 0.49 | 6.44  | 0.26 | -6.83 | 0.49 |
| #1-13@1      | 1.60E+09 | 9.93  | 0.08 | 3.88  | 0.12 | -0.64 | 0.42 | 7.93  | 0.10 | -8.03 | 0.42 |
| #1-13@2      | 1.98E+09 | 9.60  | 0.25 | 4.39  | 0.24 | 2.22  | 0.47 | 7.34  | 0.28 | -6.14 | 0.47 |
| #1-13@3      | 2.49E+09 | 9.39  | 0.23 | 5.39  | 0.26 | 3.33  | 0.48 | 6.61  | 0.27 | -6.95 | 0.48 |
| #1-14@1      | 1.53E+09 | 10.40 | 0.08 | 4.19  | 0.12 | -0.09 | 0.50 | 8.24  | 0.10 | -8.07 | 0.50 |
| #1-14@2      | 1.88E+09 | 10.40 | 0.24 | 4.40  | 0.25 | 4.84  | 0.49 | 8.14  | 0.27 | -3.53 | 0.49 |
| #1-14@3      | 2.25E+09 | 10.61 | 0.24 | 4.72  | 0.28 | 0.27  | 0.74 | 8.18  | 0.28 | -8.72 | 0.74 |
| #1-15@1      | 1.77E+09 | 5.78  | 0.14 | -0.16 | 0.28 | -6.00 | 0.57 | 5.86  | 0.20 | -5.70 | 0.57 |
| #1-15@2      | 1.88E+09 | 5.96  | 0.24 | 0.34  | 0.23 | -7.20 | 0.58 | 5.78  | 0.27 | -7.85 | 0.58 |
| #1-15@3      | 2.32E+09 | 6.41  | 0.23 | 0.71  | 0.26 | -4.82 | 0.56 | 6.04  | 0.26 | -6.17 | 0.56 |
| #1-16@1      | 1.77E+09 | 8.83  | 0.06 | 3.65  | 0.07 | -0.79 | 0.32 | 6.95  | 0.07 | -7.74 | 0.32 |
| #1-16@2      | 1.75E+09 | 9.07  | 0.23 | 5.62  | 0.21 | 4.75  | 0.38 | 6.18  | 0.25 | -5.95 | 0.38 |
| #1-16@3      | 1.41E+09 | 11.28 | 0.23 | 10.42 | 0.25 | 15.03 | 0.51 | 5.92  | 0.26 | -4.86 | 0.51 |
| son20@1      | 1.82E+09 | 0.90  | 0.11 | 1.58  | 0.20 | 2.80  | 0.40 | 0.08  | 0.15 | -0.21 | 0.40 |

|         |          |       |      |       |      |       |      |       |      |       |      |
|---------|----------|-------|------|-------|------|-------|------|-------|------|-------|------|
| son20@2 | 1.85E+09 | 0.73  | 0.23 | 1.50  | 0.25 | 4.24  | 0.52 | -0.05 | 0.27 | 1.38  | 0.52 |
| son20@3 | 2.23E+09 | 0.84  | 0.24 | 1.63  | 0.28 | 3.28  | 0.49 | 0.00  | 0.28 | 0.19  | 0.49 |
| son21@1 | 1.82E+09 | 0.83  | 0.09 | 1.69  | 0.15 | 3.44  | 0.33 | -0.04 | 0.11 | 0.23  | 0.33 |
| son21@2 | 1.84E+09 | 0.84  | 0.26 | 1.51  | 0.32 | 3.28  | 0.58 | 0.07  | 0.31 | 0.42  | 0.58 |
| son21@3 | 2.27E+09 | 1.11  | 0.23 | 2.03  | 0.28 | 4.18  | 0.51 | 0.06  | 0.28 | 0.31  | 0.51 |
| son22@1 | 1.79E+09 | 0.87  | 0.07 | 1.65  | 0.11 | 3.26  | 0.31 | 0.02  | 0.09 | 0.14  | 0.31 |
| son22@2 | 1.83E+09 | 0.76  | 0.26 | 1.63  | 0.34 | 3.45  | 0.65 | -0.08 | 0.31 | 0.35  | 0.65 |
| son22@3 | 2.23E+09 | 0.83  | 0.23 | 1.60  | 0.28 | 2.57  | 0.57 | 0.01  | 0.27 | -0.46 | 0.57 |
| son23@1 | 1.82E+09 | 0.82  | 0.11 | 1.65  | 0.19 | 3.40  | 0.42 | -0.03 | 0.15 | 0.26  | 0.42 |
| son23@2 | 1.85E+09 | 0.95  | 0.23 | 2.05  | 0.24 | 2.63  | 0.41 | -0.11 | 0.26 | -1.27 | 0.41 |
| son23@3 | 2.17E+09 | 0.82  | 0.24 | 1.65  | 0.30 | 2.93  | 0.50 | -0.03 | 0.29 | -0.20 | 0.50 |
| son20@1 | 1.82E+09 | 0.84  | 0.17 | 1.57  | 0.25 | 2.90  | 0.54 | 0.04  | 0.21 | -0.08 | 0.54 |
| son20@2 | 1.85E+09 | 0.71  | 0.17 | 1.44  | 0.22 | 4.06  | 0.67 | -0.03 | 0.21 | 1.31  | 0.67 |
| son20@3 | 2.23E+09 | 0.76  | 0.25 | 1.45  | 0.17 | 3.41  | 0.75 | 0.02  | 0.26 | 0.65  | 0.75 |
| son21@1 | 1.82E+09 | 0.78  | 0.15 | 1.67  | 0.21 | 3.59  | 0.48 | -0.09 | 0.19 | 0.40  | 0.48 |
| son21@2 | 1.84E+09 | 0.83  | 0.21 | 1.45  | 0.29 | 3.12  | 0.70 | 0.08  | 0.26 | 0.37  | 0.70 |
| son21@3 | 2.27E+09 | 1.04  | 0.24 | 1.86  | 0.18 | 4.24  | 0.72 | 0.08  | 0.26 | 0.69  | 0.72 |
| son22@1 | 1.79E+09 | 0.81  | 0.14 | 1.63  | 0.19 | 3.46  | 0.45 | -0.03 | 0.17 | 0.36  | 0.45 |
| son22@2 | 1.83E+09 | 0.75  | 0.21 | 1.57  | 0.31 | 3.31  | 0.74 | -0.06 | 0.26 | 0.32  | 0.74 |
| son22@3 | 2.23E+09 | 0.76  | 0.24 | 1.42  | 0.18 | 2.54  | 0.74 | 0.02  | 0.26 | -0.16 | 0.74 |
| son23@1 | 1.82E+09 | 0.77  | 0.17 | 1.64  | 0.24 | 3.64  | 0.52 | -0.08 | 0.21 | 0.53  | 0.52 |
| son23@2 | 1.85E+09 | 0.93  | 0.17 | 1.99  | 0.20 | 2.50  | 0.52 | -0.09 | 0.20 | -1.28 | 0.52 |
| son23@3 | 2.17E+09 | 0.75  | 0.25 | 1.47  | 0.21 | 2.83  | 0.65 | -0.01 | 0.27 | 0.02  | 0.65 |
| #1-17@1 | 1.72E+09 | 8.58  | 0.17 | 6.38  | 0.26 | 7.06  | 0.67 | 5.30  | 0.22 | -5.10 | 0.67 |
| #1-17@2 | 1.85E+09 | 8.56  | 0.17 | 5.87  | 0.21 | 5.57  | 0.56 | 5.54  | 0.20 | -5.61 | 0.56 |
| #1-17@3 | 2.24E+09 | 8.07  | 0.25 | 3.71  | 0.23 | 1.98  | 0.67 | 6.16  | 0.28 | -5.09 | 0.67 |
| #1-18@1 | 1.11E+09 | 10.12 | 0.22 | 10.34 | 0.27 | 14.06 | 0.49 | 4.80  | 0.26 | -5.69 | 0.49 |
| #1-18@2 | 1.59E+09 | 10.67 | 0.17 | 13.21 | 0.17 | 18.94 | 0.45 | 3.89  | 0.19 | -6.31 | 0.45 |
| #1-18@3 | 2.14E+09 | 11.16 | 0.25 | 14.49 | 0.24 | 22.72 | 0.84 | 3.73  | 0.28 | -4.98 | 0.84 |

|         |          |       |      |       |      |       |      |       |      |       |      |
|---------|----------|-------|------|-------|------|-------|------|-------|------|-------|------|
| #1-19@1 | 1.76E+09 | 8.21  | 0.14 | 12.46 | 0.18 | 21.63 | 0.43 | 1.81  | 0.17 | -2.18 | 0.43 |
| #1-19@2 | 1.83E+09 | 6.72  | 0.17 | 9.40  | 0.19 | 15.63 | 0.43 | 1.89  | 0.20 | -2.31 | 0.43 |
| #1-19@3 | 2.30E+09 | 7.96  | 0.24 | 12.27 | 0.15 | 21.68 | 0.54 | 1.66  | 0.25 | -1.77 | 0.54 |
| #1-20@1 | 1.74E+09 | 9.59  | 0.16 | 11.43 | 0.17 | 16.71 | 0.37 | 3.72  | 0.18 | -5.12 | 0.37 |
| #1-20@2 | 1.80E+09 | 8.77  | 0.28 | 11.61 | 0.42 | 18.30 | 0.97 | 2.81  | 0.35 | -3.88 | 0.97 |
| #1-20@3 | 2.33E+09 | 7.65  | 0.26 | 10.32 | 0.23 | 17.34 | 0.63 | 2.35  | 0.28 | -2.36 | 0.63 |
| #1@21   | 1.60E+09 | 9.43  | 0.14 | 9.10  | 0.17 | 10.84 | 0.37 | 4.76  | 0.17 | -6.53 | 0.37 |
| #1@22   | 1.74E+09 | 10.95 | 0.17 | 10.82 | 0.19 | 13.17 | 0.38 | 5.40  | 0.20 | -7.50 | 0.38 |
| #1@23   | 2.26E+09 | 10.07 | 0.29 | 9.67  | 0.39 | 11.91 | 0.94 | 5.10  | 0.35 | -6.55 | 0.94 |
| #1-22@1 | 1.42E+09 | 10.72 | 0.23 | 10.12 | 0.27 | 14.22 | 0.45 | 5.53  | 0.26 | -5.09 | 0.45 |
| #1-22@2 | 1.77E+09 | 10.80 | 0.18 | 12.71 | 0.18 | 18.57 | 0.40 | 4.27  | 0.20 | -5.71 | 0.40 |
| #1-22@3 | 2.40E+09 | 10.32 | 0.26 | 12.57 | 0.24 | 18.35 | 0.58 | 3.86  | 0.29 | -5.68 | 0.58 |
| #1-23@1 | 1.68E+09 | 10.65 | 0.16 | 9.32  | 0.25 | 10.14 | 0.50 | 5.86  | 0.21 | -7.65 | 0.50 |
| #1-23@2 | 1.90E+09 | 11.41 | 0.16 | 10.70 | 0.18 | 11.45 | 0.37 | 5.91  | 0.19 | -8.98 | 0.37 |
| #1-23@3 | 1.97E+09 | 12.94 | 0.24 | 13.01 | 0.14 | 16.33 | 0.43 | 6.26  | 0.25 | -8.54 | 0.43 |
| #1-24@1 | 1.51E+09 | 10.78 | 0.15 | 11.08 | 0.19 | 15.12 | 0.78 | 5.10  | 0.18 | -6.03 | 0.78 |
| #1-24@2 | 1.66E+09 | 11.78 | 0.16 | 11.59 | 0.19 | 14.62 | 0.57 | 5.83  | 0.19 | -7.52 | 0.57 |
| #1-24@3 | 2.20E+09 | 13.45 | 0.24 | 13.21 | 0.15 | 17.50 | 0.42 | 6.67  | 0.25 | -7.74 | 0.42 |
| #1-25@1 | 7.38E+08 | 12.40 | 0.16 | 11.10 | 0.19 | 14.14 | 0.67 | 6.70  | 0.18 | -7.05 | 0.67 |
| #1-25@2 | 1.05E+09 | 11.89 | 0.18 | 11.41 | 0.21 | 17.55 | 0.41 | 6.03  | 0.21 | -4.24 | 0.41 |
| #1-25@3 | 1.30E+09 | 12.59 | 0.26 | 13.38 | 0.13 | 20.45 | 0.38 | 5.73  | 0.27 | -5.12 | 0.38 |
| #1-26@1 | 1.56E+09 | 13.47 | 0.14 | 10.97 | 0.17 | 11.93 | 0.35 | 7.84  | 0.16 | -9.01 | 0.35 |
| #1-26@2 | 1.70E+09 | 14.47 | 0.21 | 13.08 | 0.23 | 16.30 | 0.42 | 7.76  | 0.24 | -8.69 | 0.42 |
| #1-26@3 | 2.29E+09 | 12.91 | 0.28 | 11.62 | 0.35 | 14.95 | 0.68 | 6.94  | 0.33 | -7.24 | 0.68 |
| #1-27@1 | 8.31E+08 | 8.26  | 0.16 | 7.93  | 0.19 | 13.06 | 0.57 | 4.18  | 0.18 | -2.06 | 0.57 |
| #1-27@2 | 1.09E+09 | 8.78  | 0.19 | 9.65  | 0.23 | 16.08 | 0.48 | 3.83  | 0.22 | -2.33 | 0.48 |
| #1-27@3 | 1.25E+09 | 10.36 | 0.25 | 11.55 | 0.16 | 18.38 | 0.38 | 4.43  | 0.27 | -3.69 | 0.38 |
| son24@1 | 1.75E+09 | 0.74  | 0.16 | 1.25  | 0.23 | 2.49  | 0.38 | 0.09  | 0.20 | 0.11  | 0.38 |
| son24@2 | 1.86E+09 | 0.86  | 0.18 | 1.69  | 0.26 | 3.57  | 0.50 | -0.02 | 0.23 | 0.36  | 0.50 |
| son24@3 | 2.17E+09 | 0.62  | 0.24 | 1.30  | 0.19 | 2.65  | 0.45 | -0.05 | 0.26 | 0.19  | 0.45 |

|         |          |      |      |      |      |      |      |       |      |       |      |
|---------|----------|------|------|------|------|------|------|-------|------|-------|------|
| son25@1 | 1.81E+09 | 0.73 | 0.17 | 1.52 | 0.24 | 4.11 | 0.64 | -0.05 | 0.21 | 1.23  | 0.64 |
| son25@2 | 1.82E+09 | 1.03 | 0.17 | 1.83 | 0.21 | 3.20 | 0.46 | 0.09  | 0.20 | -0.27 | 0.46 |
| son25@3 | 2.15E+09 | 0.81 | 0.25 | 1.69 | 0.20 | 3.12 | 0.35 | -0.06 | 0.27 | -0.10 | 0.35 |
| son26@1 | 1.78E+09 | 1.02 | 0.16 | 1.81 | 0.24 | 3.33 | 0.46 | 0.09  | 0.20 | -0.11 | 0.46 |
| son26@2 | 1.81E+09 | 0.84 | 0.17 | 1.55 | 0.18 | 3.23 | 0.28 | 0.05  | 0.19 | 0.29  | 0.28 |
| son26@3 | 2.20E+09 | 0.95 | 0.25 | 1.83 | 0.23 | 3.73 | 0.40 | 0.01  | 0.28 | 0.25  | 0.40 |
| son27@1 | 1.78E+09 | 0.95 | 0.15 | 1.80 | 0.21 | 3.39 | 0.43 | 0.03  | 0.18 | -0.03 | 0.43 |
| son27@2 | 1.83E+09 | 0.69 | 0.18 | 1.36 | 0.23 | 3.32 | 0.49 | -0.01 | 0.21 | 0.73  | 0.49 |
| son27@3 | 2.21E+09 | 0.95 | 0.26 | 1.85 | 0.23 | 3.53 | 0.49 | 0.00  | 0.29 | 0.02  | 0.49 |

GKF01\_mount\_4\_disseminated\_bottomsample\_and\_vein

|                |          |       |      |       |      |        |      |       |      |       |      |
|----------------|----------|-------|------|-------|------|--------|------|-------|------|-------|------|
| son2tryagain@1 | 1.64E+09 | 0.80  | 0.14 | 1.62  | 0.22 | 3.13   | 0.44 | -0.03 | 0.18 | 0.06  | 0.44 |
| son2tryagain@2 | 1.93E+09 | 0.77  | 0.11 | 1.65  | 0.16 | 2.75   | 0.49 | -0.07 | 0.14 | -0.38 | 0.49 |
| son2tryagain@3 | 2.66E+09 | 0.68  | 0.07 | 1.53  | 0.11 | 2.96   | 0.23 | -0.10 | 0.09 | 0.06  | 0.23 |
| son3@1         | 1.64E+09 | 0.59  | 0.13 | 1.37  | 0.20 | 2.77   | 0.55 | -0.11 | 0.17 | 0.17  | 0.55 |
| son3@2         | 1.91E+09 | 0.63  | 0.10 | 1.32  | 0.18 | 2.31   | 0.40 | -0.05 | 0.13 | -0.20 | 0.40 |
| son3@3         | 2.61E+09 | 0.72  | 0.07 | 1.52  | 0.09 | 3.30   | 0.24 | -0.06 | 0.08 | 0.41  | 0.24 |
| son4@1         | 1.63E+09 | 0.82  | 0.13 | 1.47  | 0.21 | 2.50   | 0.50 | 0.06  | 0.17 | -0.29 | 0.50 |
| son4@2         | 1.92E+09 | 0.76  | 0.11 | 1.47  | 0.17 | 2.81   | 0.40 | 0.00  | 0.14 | 0.01  | 0.40 |
| son4@3         | 2.63E+09 | 0.72  | 0.07 | 1.47  | 0.09 | 2.55   | 0.32 | -0.04 | 0.09 | -0.25 | 0.32 |
| son5@1         | 1.62E+09 | 0.78  | 0.11 | 1.61  | 0.20 | 3.02   | 0.54 | -0.05 | 0.15 | -0.03 | 0.54 |
| son5@2         | 1.91E+09 | 0.84  | 0.11 | 1.57  | 0.18 | 2.54   | 0.45 | 0.03  | 0.14 | -0.44 | 0.45 |
| son5@3         | 2.62E+09 | 0.94  | 0.08 | 1.71  | 0.09 | 3.53   | 0.22 | 0.06  | 0.09 | 0.28  | 0.22 |
| freo1@1        | 1.61E+09 | -2.26 | 0.16 | -4.70 | 0.25 | -9.72  | 0.54 | 0.16  | 0.20 | -0.81 | 0.54 |
| freo1@2        | 1.98E+09 | -2.68 | 0.11 | -5.17 | 0.17 | -10.19 | 0.40 | -0.01 | 0.14 | -0.39 | 0.40 |
| freo1@3        | 2.67E+09 | -2.76 | 0.07 | -5.43 | 0.08 | -10.83 | 0.26 | 0.04  | 0.08 | -0.53 | 0.26 |
| #4-34@1        | 1.65E+09 | 13.41 | 0.10 | 10.97 | 0.16 | 11.77  | 0.42 | 7.77  | 0.13 | -9.18 | 0.42 |
| #4-34@2        | 1.95E+09 | 13.82 | 0.13 | 11.32 | 0.22 | 12.50  | 0.48 | 8.00  | 0.17 | -9.13 | 0.48 |

|         |          |       |      |       |      |       |      |       |      |        |      |
|---------|----------|-------|------|-------|------|-------|------|-------|------|--------|------|
| #4-34@3 | 2.74E+09 | 15.63 | 0.10 | 14.04 | 0.11 | 16.94 | 0.26 | 8.42  | 0.11 | -9.90  | 0.26 |
| #4-35@1 | 1.60E+09 | 10.54 | 0.19 | 9.36  | 0.34 | 11.15 | 0.76 | 5.73  | 0.26 | -6.71  | 0.76 |
| #4-35@2 | 1.41E+09 | 10.18 | 0.18 | 9.76  | 0.31 | 12.77 | 0.65 | 5.17  | 0.24 | -5.85  | 0.65 |
| #4-35@3 | 6.31E+08 | 12.33 | 0.17 | 13.67 | 0.15 | 21.07 | 0.59 | 5.32  | 0.18 | -5.06  | 0.59 |
| #4-36@1 | 1.62E+09 | 12.01 | 0.13 | 12.41 | 0.21 | 17.61 | 0.48 | 5.64  | 0.17 | -6.11  | 0.48 |
| #4-36@2 | 1.89E+09 | 11.95 | 0.10 | 12.27 | 0.17 | 17.58 | 0.51 | 5.65  | 0.14 | -5.86  | 0.51 |
| #4-36@3 | 2.51E+09 | 11.96 | 0.06 | 12.25 | 0.05 | 17.17 | 0.28 | 5.67  | 0.07 | -6.23  | 0.28 |
| #4-37@1 | 1.62E+09 | 11.60 | 0.13 | 11.49 | 0.22 | 15.40 | 0.50 | 5.70  | 0.17 | -6.55  | 0.50 |
| #4-37@2 | 1.93E+09 | 11.71 | 0.10 | 11.59 | 0.18 | 15.90 | 0.41 | 5.76  | 0.14 | -6.23  | 0.41 |
| #4-37@3 | 2.62E+09 | 11.50 | 0.07 | 11.33 | 0.09 | 14.93 | 0.31 | 5.68  | 0.09 | -6.69  | 0.31 |
| #4-38@1 | 1.58E+09 | 11.49 | 0.15 | 7.92  | 0.27 | 7.59  | 0.54 | 7.41  | 0.20 | -7.52  | 0.54 |
| #4-38@2 | 1.99E+09 | 11.37 | 0.14 | 7.64  | 0.20 | 6.89  | 0.49 | 7.44  | 0.17 | -7.67  | 0.49 |
| #4-38@3 | 2.71E+09 | 11.43 | 0.08 | 7.85  | 0.09 | 6.91  | 0.30 | 7.40  | 0.09 | -8.06  | 0.30 |
| #4-39@1 | 1.59E+09 | 18.44 | 0.12 | 18.20 | 0.17 | 24.04 | 0.44 | 9.11  | 0.15 | -10.83 | 0.44 |
| #4-39@2 | 1.91E+09 | 18.67 | 0.16 | 18.62 | 0.22 | 25.01 | 0.58 | 9.12  | 0.20 | -10.66 | 0.58 |
| #4-39@3 | 2.59E+09 | 17.01 | 0.15 | 16.28 | 0.23 | 21.24 | 0.40 | 8.66  | 0.19 | -9.92  | 0.40 |
| son6@1  | 1.61E+09 | 0.86  | 0.14 | 1.66  | 0.21 | 3.05  | 0.38 | 0.01  | 0.18 | -0.10  | 0.38 |
| son6@2  | 1.90E+09 | 0.80  | 0.11 | 1.72  | 0.18 | 3.22  | 0.49 | -0.09 | 0.14 | -0.05  | 0.49 |
| son6@3  | 2.56E+09 | 0.89  | 0.08 | 1.69  | 0.09 | 3.30  | 0.36 | 0.02  | 0.10 | 0.10   | 0.36 |
| son7@1  | 1.59E+09 | 0.93  | 0.11 | 1.82  | 0.21 | 3.70  | 0.40 | -0.01 | 0.15 | 0.23   | 0.40 |
| son7@2  | 1.86E+09 | 0.91  | 0.11 | 1.74  | 0.17 | 3.70  | 0.53 | 0.01  | 0.14 | 0.39   | 0.53 |
| son7@3  | 2.54E+09 | 0.87  | 0.08 | 1.66  | 0.10 | 3.20  | 0.31 | 0.01  | 0.10 | 0.04   | 0.31 |
| freo2@1 | 1.58E+09 | -2.04 | 0.15 | -4.17 | 0.20 | -7.64 | 0.52 | 0.11  | 0.18 | 0.26   | 0.52 |
| freo2@2 | 1.90E+09 | -2.06 | 0.09 | -4.14 | 0.18 | -8.27 | 0.46 | 0.07  | 0.13 | -0.42  | 0.46 |
| freo2@3 | 2.54E+09 | -2.14 | 0.08 | -4.25 | 0.10 | -8.55 | 0.32 | 0.05  | 0.10 | -0.49  | 0.32 |
| #4-40@1 | 1.56E+09 | 18.01 | 0.11 | 18.29 | 0.21 | 24.82 | 0.41 | 8.64  | 0.15 | -10.21 | 0.41 |
| #4-40@2 | 1.96E+09 | 17.68 | 0.13 | 17.84 | 0.19 | 24.55 | 0.39 | 8.53  | 0.16 | -9.62  | 0.39 |
| #4-40@3 | 2.68E+09 | 16.37 | 0.13 | 16.65 | 0.15 | 22.53 | 0.39 | 7.83  | 0.15 | -9.33  | 0.39 |
| #4-41@1 | 1.58E+09 | 14.37 | 0.19 | 8.31  | 0.28 | 6.10  | 0.45 | 10.10 | 0.24 | -9.76  | 0.45 |
| #4-41@2 | 1.87E+09 | 12.69 | 0.18 | 6.84  | 0.26 | 4.21  | 0.48 | 9.17  | 0.23 | -8.82  | 0.48 |

|         |          |       |      |       |      |       |      |       |      |       |      |
|---------|----------|-------|------|-------|------|-------|------|-------|------|-------|------|
| #4-41@3 | 2.51E+09 | 11.16 | 0.11 | 5.11  | 0.15 | 0.90  | 0.30 | 8.53  | 0.13 | -8.83 | 0.30 |
| #4-42@1 | 1.11E+09 | 12.77 | 0.10 | 7.47  | 0.11 | 5.47  | 0.32 | 8.94  | 0.11 | -8.76 | 0.32 |
| #4-42@2 | 1.35E+09 | 13.70 | 0.07 | 9.36  | 0.08 | 8.89  | 0.40 | 8.89  | 0.08 | -8.97 | 0.40 |
| #4-42@3 | 1.14E+09 | 15.69 | 0.08 | 11.86 | 0.09 | 13.04 | 0.37 | 9.60  | 0.09 | -9.61 | 0.37 |
| #4-43@1 | 1.55E+09 | 8.78  | 0.13 | 2.88  | 0.20 | -1.05 | 0.39 | 7.30  | 0.17 | -6.53 | 0.39 |
| #4-43@2 | 1.85E+09 | 8.99  | 0.09 | 2.71  | 0.14 | -2.24 | 0.46 | 7.60  | 0.12 | -7.39 | 0.46 |
| #4-43@3 | 2.51E+09 | 10.14 | 0.07 | 3.90  | 0.03 | -0.89 | 0.22 | 8.13  | 0.07 | -8.32 | 0.22 |
| #4-44@1 | 1.58E+09 | 9.08  | 0.12 | 3.72  | 0.24 | -0.19 | 0.49 | 7.16  | 0.17 | -7.27 | 0.49 |
| #4-44@2 | 1.88E+09 | 9.90  | 0.07 | 4.09  | 0.08 | 0.27  | 0.28 | 7.80  | 0.08 | -7.52 | 0.28 |
| #4-44@3 | 2.54E+09 | 13.19 | 0.12 | 7.40  | 0.10 | 4.60  | 0.28 | 9.38  | 0.13 | -9.51 | 0.28 |
| #4-45@1 | 1.57E+09 | 9.29  | 0.12 | 3.10  | 0.18 | -1.79 | 0.35 | 7.69  | 0.15 | -7.70 | 0.35 |
| #4-45@2 | 1.90E+09 | 10.65 | 0.07 | 4.93  | 0.10 | 1.09  | 0.36 | 8.11  | 0.08 | -8.31 | 0.36 |
| #4-45@3 | 2.58E+09 | 12.24 | 0.07 | 6.62  | 0.03 | 3.98  | 0.26 | 8.83  | 0.07 | -8.65 | 0.26 |
| son8@1  | 1.60E+09 | 0.90  | 0.13 | 1.67  | 0.19 | 3.27  | 0.43 | 0.03  | 0.16 | 0.09  | 0.43 |
| son8@2  | 1.87E+09 | 0.90  | 0.10 | 1.72  | 0.18 | 3.49  | 0.39 | 0.02  | 0.14 | 0.23  | 0.39 |
| son8@3  | 2.55E+09 | 0.84  | 0.07 | 1.68  | 0.09 | 3.14  | 0.22 | -0.02 | 0.09 | -0.05 | 0.22 |
| son9@1  | 1.59E+09 | 0.83  | 0.13 | 1.59  | 0.22 | 3.56  | 0.54 | 0.01  | 0.17 | 0.54  | 0.54 |
| son9@2  | 1.88E+09 | 0.82  | 0.10 | 1.55  | 0.17 | 3.47  | 0.35 | 0.02  | 0.14 | 0.51  | 0.35 |
| son9@3  | 2.54E+09 | 0.79  | 0.08 | 1.50  | 0.10 | 3.32  | 0.29 | 0.02  | 0.09 | 0.48  | 0.29 |
| #4-46@1 | 1.50E+09 | 8.65  | 0.19 | 3.01  | 0.23 | -1.02 | 0.46 | 7.10  | 0.23 | -6.74 | 0.46 |
| #4-46@2 | 1.89E+09 | 7.71  | 0.14 | 3.06  | 0.24 | 0.04  | 0.50 | 6.14  | 0.18 | -5.78 | 0.50 |
| #4-46@3 | 2.57E+09 | 8.16  | 0.07 | 2.84  | 0.11 | -1.26 | 0.43 | 6.69  | 0.09 | -6.67 | 0.43 |
| #4-47@1 | 1.54E+09 | 9.72  | 0.11 | 4.50  | 0.21 | 0.91  | 0.53 | 7.41  | 0.15 | -7.65 | 0.53 |
| #4-47@2 | 1.89E+09 | 11.03 | 0.08 | 5.29  | 0.11 | 2.14  | 0.28 | 8.31  | 0.10 | -7.94 | 0.28 |
| #4-47@3 | 2.27E+09 | 13.12 | 0.09 | 7.94  | 0.04 | 6.01  | 0.25 | 9.04  | 0.10 | -9.13 | 0.25 |
| #4-48@1 | 1.54E+09 | 8.10  | 0.14 | 1.84  | 0.20 | -3.50 | 0.52 | 7.16  | 0.17 | -7.00 | 0.52 |
| #4-48@2 | 1.92E+09 | 8.04  | 0.12 | 1.52  | 0.21 | -4.32 | 0.50 | 7.25  | 0.16 | -7.22 | 0.50 |
| #4-48@3 | 2.63E+09 | 8.09  | 0.07 | 1.47  | 0.07 | -4.47 | 0.32 | 7.33  | 0.08 | -7.27 | 0.32 |
| #4-49@1 | 1.54E+09 | 10.39 | 0.08 | 4.72  | 0.17 | 1.32  | 0.38 | 7.96  | 0.12 | -7.66 | 0.38 |
| #4-49@2 | 1.80E+09 | 12.36 | 0.08 | 7.29  | 0.11 | 5.78  | 0.64 | 8.61  | 0.10 | -8.12 | 0.64 |



|         |          |      |      |      |      |      |      |      |      |       |      |
|---------|----------|------|------|------|------|------|------|------|------|-------|------|
| son13@3 | 3.28E+09 | 0.00 | 0.00 | 0.00 | 0.00 | 0.00 | 0.00 | 0.00 | 0.00 | 0.00  | 0.00 |
| son14@1 | 1.55E+09 | 0.98 | 0.13 | 1.71 | 0.21 | 3.17 | 0.48 | 0.10 | 0.17 | -0.07 | 0.48 |
| son14@2 | 1.83E+09 | 0.91 | 0.10 | 1.69 | 0.17 | 3.48 | 0.49 | 0.04 | 0.14 | 0.27  | 0.49 |
| son14@3 | 2.50E+09 | 0.94 | 0.09 | 1.78 | 0.11 | 3.53 | 0.36 | 0.03 | 0.10 | 0.14  | 0.36 |

GKF01-mount4-grain3

|                              |          |        |       |        |       |        |       |        |       |        |       |
|------------------------------|----------|--------|-------|--------|-------|--------|-------|--------|-------|--------|-------|
| son@02                       | 2.11E+09 | 0.795  | 0.033 | 1.538  | 0.018 | 3.663  | 0.134 | 0.004  | 0.034 | 0.739  | 0.134 |
| son@03                       | 2.12E+09 | 0.795  | 0.029 | 1.547  | 0.018 | 3.786  | 0.146 | -0.001 | 0.031 | 0.845  | 0.146 |
| son@04                       | 2.10E+09 | 0.859  | 0.032 | 1.571  | 0.018 | 3.881  | 0.139 | 0.050  | 0.033 | 0.894  | 0.139 |
| son@05                       | 2.10E+09 | 0.899  | 0.031 | 1.680  | 0.018 | 3.966  | 0.139 | 0.034  | 0.033 | 0.771  | 0.139 |
| GKF01_mount4_1102_grain-3@1  | 2.07E+09 | 12.849 | 0.030 | 13.162 | 0.018 | 19.200 | 0.138 | 6.092  | 0.032 | -5.956 | 0.138 |
| GKF01_mount4_1102_grain-3@2  | 2.08E+09 | 13.169 | 0.033 | 13.381 | 0.018 | 19.419 | 0.137 | 6.300  | 0.034 | -6.158 | 0.137 |
| GKF01_mount4_1102_grain-3@3  | 2.08E+09 | 13.557 | 0.030 | 13.474 | 0.018 | 19.544 | 0.154 | 6.640  | 0.031 | -6.212 | 0.154 |
| GKF01_mount4_1102_grain-3@4  | 2.09E+09 | 13.598 | 0.031 | 13.512 | 0.019 | 19.250 | 0.153 | 6.662  | 0.033 | -6.579 | 0.153 |
| GKF01_mount4_1102_grain-3@5  | 2.04E+09 | 13.403 | 0.031 | 13.358 | 0.019 | 18.945 | 0.147 | 6.546  | 0.032 | -6.588 | 0.147 |
| freo@1                       | 2.09E+09 | -2.231 | 0.033 | -4.472 | 0.018 | -7.837 | 0.147 | 0.074  | 0.034 | 0.642  | 0.147 |
| son@06                       | 2.12E+09 | 0.913  | 0.030 | 1.684  | 0.019 | 3.878  | 0.134 | 0.045  | 0.032 | 0.676  | 0.134 |
| son@07                       | 2.13E+09 | 0.896  | 0.033 | 1.624  | 0.018 | 3.937  | 0.137 | 0.060  | 0.035 | 0.849  | 0.137 |
| GKF01_mount4_1102_grain-3@7  | 2.10E+09 | 13.410 | 0.032 | 13.226 | 0.019 | 18.520 | 0.162 | 6.620  | 0.033 | -6.759 | 0.162 |
| GKF01_mount4_1102_grain-3@8  | 2.11E+09 | 13.638 | 0.031 | 13.615 | 0.019 | 19.307 | 0.135 | 6.649  | 0.033 | -6.719 | 0.135 |
| GKF01_mount4_1102_grain-3@9  | 2.11E+09 | 13.314 | 0.030 | 13.420 | 0.018 | 19.273 | 0.149 | 6.425  | 0.031 | -6.379 | 0.149 |
| GKF01_mount4_1102_grain-3@10 | 2.12E+09 | 13.802 | 0.030 | 14.247 | 0.018 | 20.868 | 0.135 | 6.490  | 0.031 | -6.375 | 0.135 |
| GKF01_mount4_1102_grain-3@11 | 2.09E+09 | 17.126 | 0.033 | 17.424 | 0.018 | 24.656 | 0.137 | 8.191  | 0.035 | -8.709 | 0.137 |
| GKF01_mount4_1102_grain-3@12 | 2.08E+09 | 14.017 | 0.035 | 14.129 | 0.018 | 20.153 | 0.136 | 6.765  | 0.036 | -6.862 | 0.136 |
| freo@2                       | 2.05E+09 | -2.212 | 0.033 | -4.421 | 0.018 | -7.406 | 0.144 | 0.067  | 0.034 | 0.978  | 0.144 |
| son@08                       | 2.10E+09 | 0.883  | 0.033 | 1.664  | 0.018 | 4.127  | 0.135 | 0.026  | 0.035 | 0.963  | 0.135 |
| son@09                       | 2.10E+09 | 0.862  | 0.033 | 1.631  | 0.019 | 3.990  | 0.135 | 0.022  | 0.034 | 0.890  | 0.135 |
| GKF01_mount4_1102_grain-3@13 | 2.09E+09 | 13.869 | 0.033 | 13.811 | 0.018 | 19.943 | 0.136 | 6.780  | 0.034 | -6.460 | 0.136 |



|                              |          |        |       |        |       |        |       |        |       |         |       |
|------------------------------|----------|--------|-------|--------|-------|--------|-------|--------|-------|---------|-------|
| GKF01_mount4_1102_grain-3@14 | 2.10E+09 | 13.801 | 0.032 | 13.850 | 0.019 | 19.946 | 0.136 | 6.692  | 0.033 | -6.533  | 0.136 |
| GKF01_mount4_1102_grain-3@15 | 2.14E+09 | 13.593 | 0.031 | 13.641 | 0.018 | 19.462 | 0.135 | 6.590  | 0.032 | -6.615  | 0.135 |
| GKF01_mount4_1102_grain-3@16 | 2.17E+09 | 13.397 | 0.031 | 13.379 | 0.019 | 19.093 | 0.134 | 6.529  | 0.032 | -6.480  | 0.134 |
| GKF01_mount4_1102_grain-3@17 | 2.18E+09 | 13.041 | 0.033 | 13.220 | 0.018 | 19.047 | 0.144 | 6.255  | 0.034 | -6.220  | 0.144 |
| GKF01_mount4_1102_grain-3@18 | 2.19E+09 | 13.596 | 0.035 | 13.573 | 0.018 | 19.603 | 0.172 | 6.629  | 0.036 | -6.343  | 0.172 |
| GKF01_mount4_1102_grain-3@19 | 2.20E+09 | 13.747 | 0.033 | 13.812 | 0.019 | 19.992 | 0.135 | 6.657  | 0.034 | -6.414  | 0.135 |
| son@10                       | 2.25E+09 | 0.869  | 0.031 | 1.615  | 0.018 | 3.863  | 0.130 | 0.038  | 0.033 | 0.792   | 0.130 |
| son@11                       | 2.22E+09 | 0.870  | 0.033 | 1.605  | 0.018 | 3.950  | 0.131 | 0.044  | 0.035 | 0.899   | 0.131 |
| son@12                       | 2.22E+09 | 0.817  | 0.030 | 1.600  | 0.018 | 3.870  | 0.135 | -0.007 | 0.032 | 0.827   | 0.135 |
| son@13                       | 2.21E+09 | 0.831  | 0.035 | 1.579  | 0.018 | 3.996  | 0.131 | 0.018  | 0.036 | 0.994   | 0.131 |
| son@15                       | 2.11E+09 | 0.885  | 0.037 | 1.604  | 0.018 | 3.153  | 0.150 | 0.059  | 0.038 | 0.103   | 0.150 |
| son@16                       | 2.11E+09 | 0.902  | 0.031 | 1.631  | 0.018 | 3.279  | 0.146 | 0.062  | 0.032 | 0.178   | 0.146 |
| son@17                       | 2.12E+09 | 0.922  | 0.031 | 1.734  | 0.018 | 3.273  | 0.142 | 0.030  | 0.032 | -0.023  | 0.142 |
| GKF01_mount4_1102_grain-3@20 | 2.00E+09 | 18.077 | 0.031 | 17.803 | 0.021 | 23.316 | 0.146 | 8.948  | 0.033 | -10.780 | 0.146 |
| GKF01_mount4_1102_grain-3@21 | 2.08E+09 | 13.839 | 0.033 | 14.028 | 0.019 | 19.252 | 0.166 | 6.639  | 0.034 | -7.569  | 0.166 |
| GKF01_mount4_1102_grain-3@22 | 2.03E+09 | 13.940 | 0.034 | 13.802 | 0.019 | 19.025 | 0.147 | 6.855  | 0.035 | -7.362  | 0.147 |
| GKF01_mount4_1102_grain-3@23 | 2.01E+09 | 13.762 | 0.034 | 14.285 | 0.018 | 20.584 | 0.144 | 6.430  | 0.035 | -6.732  | 0.144 |
| GKF01_mount4_1102_grain-3@24 | 1.97E+09 | 13.940 | 0.035 | 14.055 | 0.020 | 19.468 | 0.159 | 6.726  | 0.036 | -7.406  | 0.159 |
| GKF01_mount4_1102_grain-3@25 | 1.93E+09 | 13.033 | 0.033 | 13.141 | 0.019 | 18.053 | 0.145 | 6.287  | 0.034 | -7.061  | 0.145 |
| GKF01_mount4_1102_grain-3@26 | 1.99E+09 | 13.784 | 0.033 | 13.809 | 0.018 | 19.219 | 0.143 | 6.696  | 0.034 | -7.180  | 0.143 |
| son@18                       | 2.03E+09 | 0.846  | 0.033 | 1.659  | 0.018 | 3.359  | 0.140 | -0.008 | 0.034 | 0.206   | 0.140 |
| son@19                       | 2.03E+09 | 0.762  | 0.030 | 1.548  | 0.019 | 3.183  | 0.144 | -0.035 | 0.031 | 0.240   | 0.144 |
| GKF01_mount4_1102_grain-3@27 | 2.03E+09 | 13.646 | 0.031 | 14.259 | 0.018 | 20.078 | 0.147 | 6.328  | 0.033 | -7.187  | 0.147 |
| GKF01_mount4_1102_grain-3@28 | 2.03E+09 | 13.668 | 0.033 | 14.329 | 0.018 | 20.575 | 0.140 | 6.314  | 0.034 | -6.826  | 0.140 |
| GKF01_mount4_1102_grain-3@27 | 2.03E+09 | 13.646 | 0.031 | 14.259 | 0.018 | 20.088 | 0.146 | 6.328  | 0.033 | -7.178  | 0.146 |
| GKF01_mount4_1102_grain-3@28 | 2.03E+09 | 13.668 | 0.033 | 14.329 | 0.018 | 20.585 | 0.140 | 6.314  | 0.034 | -6.816  | 0.140 |
| GKF01_mount4_1102_grain-3@29 | 2.01E+09 | 13.670 | 0.033 | 14.104 | 0.019 | 19.862 | 0.146 | 6.431  | 0.034 | -7.105  | 0.146 |
| GKF01_mount4_1102_grain-3@30 | 2.00E+09 | 13.812 | 0.031 | 13.768 | 0.019 | 19.145 | 0.140 | 6.745  | 0.033 | -7.176  | 0.140 |
| son@20                       | 2.00E+09 | 0.765  | 0.033 | 1.568  | 0.019 | 3.315  | 0.139 | -0.042 | 0.035 | 0.334   | 0.139 |
| son@21                       | 2.01E+09 | 0.799  | 0.030 | 1.536  | 0.019 | 3.200  | 0.139 | 0.009  | 0.032 | 0.280   | 0.139 |

|                              |          |        |       |        |       |        |       |        |       |        |       |
|------------------------------|----------|--------|-------|--------|-------|--------|-------|--------|-------|--------|-------|
| GKF01_mount4_1102_grain-3@33 | 1.99E+09 | 13.347 | 0.032 | 13.601 | 0.018 | 19.254 | 0.141 | 6.366  | 0.033 | -6.746 | 0.141 |
| GKF01_mount4_1102_grain-3@34 | 2.00E+09 | 13.770 | 0.032 | 13.717 | 0.019 | 19.077 | 0.150 | 6.729  | 0.034 | -7.146 | 0.150 |
| GKF01_mount4_1102_grain-3@35 | 2.01E+09 | 13.795 | 0.033 | 13.927 | 0.018 | 19.253 | 0.140 | 6.646  | 0.034 | -7.374 | 0.140 |
| GKF01_mount4_1102_grain-3@36 | 1.92E+09 | 13.531 | 0.030 | 13.676 | 0.019 | 18.844 | 0.146 | 6.512  | 0.032 | -7.301 | 0.146 |
| GKF01_mount4_1102_grain-3@37 | 1.99E+09 | 13.758 | 0.033 | 14.082 | 0.019 | 19.652 | 0.141 | 6.531  | 0.035 | -7.273 | 0.141 |
| GKF01_mount4_1102_grain-3@38 | 1.98E+09 | 13.770 | 0.031 | 13.815 | 0.019 | 18.618 | 0.160 | 6.679  | 0.033 | -7.794 | 0.160 |
| son@23                       | 1.99E+09 | 0.796  | 0.030 | 1.632  | 0.019 | 3.245  | 0.140 | -0.045 | 0.031 | 0.142  | 0.140 |
| son@24                       | 2.01E+09 | 0.794  | 0.032 | 1.579  | 0.018 | 3.220  | 0.171 | -0.019 | 0.034 | 0.217  | 0.171 |

---

Note: Spots labeled Freo include two types of sulfides with different composition.

248

249

**Table S4: Data Used for Plotting: (Based on Single SIMS spot – i.e., data for pits occupied more than once were averaged)**

| Analysis                     | Depth  | $^{32}\text{S}_{\text{counts}}$ | $\delta^{33}\text{S}_{\text{VCDT}}$ | 2s (est) | $\delta^{34}\text{S}_{\text{VCDT}}$ | 2s (est) | $\delta^{36}\text{S}_{\text{VCDT}}$ | 2s (est) | $\Delta^{33}\text{S}_{\text{VCDT}}$ | 2s (est) | $\Delta^{36}\text{S}_{\text{VCDT}}$ | 2s (est) |
|------------------------------|--------|---------------------------------|-------------------------------------|----------|-------------------------------------|----------|-------------------------------------|----------|-------------------------------------|----------|-------------------------------------|----------|
| GKF01_mount4_1102_grain-1@1  | 1102.6 | 1963684000                      | -10.57                              | 0.09     | -18.83                              | 0.05     | -33.58                              | 0.32     | -0.83                               | 0.19     | 1.89                                | 0.32     |
| GKF01_mount4_1102_grain-1@2  | 1102.6 | 2004094000                      | -11.39                              | 0.09     | -20.13                              | 0.04     | -35.78                              | 0.32     | -0.97                               | 0.18     | 2.13                                | 0.32     |
| GKF01_mount4_1102_grain-1@3  | 1102.6 | 1992369000                      | -11.63                              | 0.09     | -20.61                              | 0.04     | -36.94                              | 0.32     | -0.96                               | 0.18     | 1.86                                | 0.32     |
| GKF01_mount4_1102_grain-1@4  | 1102.6 | 1910827000                      | -7.10                               | 0.10     | -13.31                              | 0.04     | -24.08                              | 0.38     | -0.22                               | 0.20     | 1.06                                | 0.38     |
| GKF01_mount4_1102_grain-1@5  | 1102.6 | 1919286000                      | -8.83                               | 0.10     | -16.04                              | 0.04     | -28.98                              | 0.32     | -0.54                               | 0.21     | 1.27                                | 0.32     |
| GKF01_mount4_1102_grain-1@6  | 1102.6 | 1966206000                      | -10.66                              | 0.09     | -19.02                              | 0.05     | -33.92                              | 0.36     | -0.82                               | 0.19     | 1.91                                | 0.36     |
| GKF01_mount4_1102_grain-1@7  | 1102.6 | 1953448000                      | -11.35                              | 0.09     | -20.35                              | 0.04     | -36.52                              | 0.36     | -0.81                               | 0.19     | 1.79                                | 0.36     |
| GKF01_mount4_1102_grain-1@8  | 1102.6 | 1922052000                      | -11.57                              | 0.09     | -20.79                              | 0.04     | -37.63                              | 0.32     | -0.81                               | 0.19     | 1.49                                | 0.32     |
| GKF01_mount4_1102_grain-1@9  | 1102.6 | 1991534000                      | -10.66                              | 0.09     | -18.94                              | 0.05     | -33.55                              | 0.32     | -0.86                               | 0.19     | 2.14                                | 0.32     |
| GKF01_mount4_1102_grain-1@10 | 1102.6 | 1936654000                      | -11.06                              | 0.09     | -19.68                              | 0.05     | -35.36                              | 0.34     | -0.87                               | 0.18     | 1.71                                | 0.34     |
| GKF01_mount4_1102_grain-1@11 | 1102.6 | 1979796000                      | -11.70                              | 0.09     | -20.86                              | 0.04     | -37.66                              | 0.32     | -0.90                               | 0.19     | 1.61                                | 0.32     |
| GKF01_mount4_1102_grain-1@12 | 1102.6 | 2046575000                      | -11.55                              | 0.09     | -20.64                              | 0.05     | -37.33                              | 0.34     | -0.87                               | 0.18     | 1.52                                | 0.34     |
| GKF01_mount4_1102_grain-1@13 | 1102.6 | 2091787000                      | -11.02                              | 0.09     | -19.69                              | 0.04     | -35.15                              | 0.31     | -0.84                               | 0.19     | 1.93                                | 0.31     |
| GKF01_mount4_1102_grain-1@14 | 1102.6 | 2092129000                      | -11.18                              | 0.09     | -20.02                              | 0.04     | -36.13                              | 0.31     | -0.82                               | 0.18     | 1.56                                | 0.31     |
| GKF01_mount4_1102_grain-1@15 | 1102.6 | 2100716000                      | -11.16                              | 0.09     | -19.79                              | 0.04     | -35.45                              | 0.31     | -0.91                               | 0.18     | 1.81                                | 0.31     |
| GKF01_mount4_1102_grain-1@16 | 1102.6 | 2102640000                      | -11.18                              | 0.10     | -19.88                              | 0.05     | -35.40                              | 0.31     | -0.89                               | 0.20     | 2.03                                | 0.31     |
| GKF01_mount4_1102_grain-1@17 | 1102.6 | 2065836000                      | -9.56                               | 0.09     | -17.27                              | 0.05     | -31.22                              | 0.31     | -0.62                               | 0.20     | 1.34                                | 0.31     |
| GKF01_mount4_1102_grain-1@18 | 1102.6 | 2089228000                      | -10.63                              | 0.09     | -19.04                              | 0.04     | -34.19                              | 0.32     | -0.78                               | 0.18     | 1.68                                | 0.32     |
| GKF01_mount4_1102_grain-1@19 | 1102.6 | 2349567000                      | -11.31                              | 0.06     | -20.10                              | 0.03     | -35.93                              | 0.31     | -0.91                               | 0.12     | 1.92                                | 0.31     |
| GKF01_mount4_1102_grain-1@20 | 1102.6 | 2319917000                      | -12.08                              | 0.05     | -21.55                              | 0.04     | -38.74                              | 0.31     | -0.92                               | 0.11     | 1.81                                | 0.31     |
| GKF01_mount4_1102_grain-1@21 | 1102.6 | 2368344000                      | -10.72                              | 0.06     | -19.01                              | 0.04     | -33.84                              | 0.31     | -0.89                               | 0.13     | 1.97                                | 0.31     |
| GKF01_mount4_1102_grain-1@22 | 1102.6 | 2361454000                      | -10.41                              | 0.05     | -18.32                              | 0.03     | -32.51                              | 0.31     | -0.94                               | 0.10     | 2.00                                | 0.31     |
| GKF01_mount4_1102_grain-1@23 | 1102.6 | 2384411000                      | -11.67                              | 0.06     | -20.80                              | 0.03     | -37.29                              | 0.32     | -0.91                               | 0.12     | 1.85                                | 0.32     |
| GKF01_mount4_1102_grain-1@24 | 1102.6 | 2369703000                      | -11.05                              | 0.05     | -19.71                              | 0.04     | -35.57                              | 0.31     | -0.85                               | 0.11     | 1.55                                | 0.31     |
| GKF01_mount4_1102_grain-1@25 | 1102.6 | 2386896000                      | -10.41                              | 0.06     | -18.55                              | 0.03     | -33.37                              | 0.32     | -0.81                               | 0.13     | 1.58                                | 0.32     |
| GKF01_mount4_1102_grain-1@26 | 1102.6 | 2412194000                      | -11.40                              | 0.05     | -20.38                              | 0.03     | -36.43                              | 0.32     | -0.85                               | 0.11     | 1.94                                | 0.32     |
| GKF01_mount4_1102_grain-1@27 | 1102.6 | 2394080000                      | -8.99                               | 0.06     | -16.20                              | 0.03     | -28.93                              | 0.32     | -0.62                               | 0.12     | 1.62                                | 0.32     |

|                              |        |            |        |      |        |      |        |      |       |      |      |      |
|------------------------------|--------|------------|--------|------|--------|------|--------|------|-------|------|------|------|
| GKF01_mount4_1102_grain-1@28 | 1102.6 | 2405743000 | -11.02 | 0.05 | -19.62 | 0.03 | -35.10 | 0.34 | -0.87 | 0.11 | 1.85 | 0.34 |
| GKF01_mount4_1102_grain-1@29 | 1102.6 | 2441336000 | -11.10 | 0.05 | -19.78 | 0.03 | -35.40 | 0.33 | -0.87 | 0.11 | 1.85 | 0.33 |
| GKF01_mount4_1102_grain-1@30 | 1102.6 | 2432741000 | -11.10 | 0.05 | -19.82 | 0.03 | -35.86 | 0.33 | -0.85 | 0.11 | 1.46 | 0.33 |
| GKF01_mount4_1102_grain-1@31 | 1102.6 | 2347797000 | -8.40  | 0.05 | -15.12 | 0.03 | -27.08 | 0.35 | -0.58 | 0.11 | 1.44 | 0.35 |
| GKF01_mount4_1102_grain-1@32 | 1102.6 | 2430019000 | -9.57  | 0.05 | -17.10 | 0.03 | -30.84 | 0.38 | -0.73 | 0.11 | 1.40 | 0.38 |
| GKF01_mount4_1102_grain-1@33 | 1102.6 | 2345148000 | -11.32 | 0.06 | -20.17 | 0.03 | -36.46 | 0.37 | -0.88 | 0.12 | 1.52 | 0.37 |
| GKF01_mount4_1102_grain-1@34 | 1102.6 | 2423033000 | -11.57 | 0.05 | -20.63 | 0.03 | -37.09 | 0.36 | -0.90 | 0.10 | 1.74 | 0.36 |
| GKF01_mount4_1102_grain-1@35 | 1102.6 | 2408678000 | -10.81 | 0.06 | -19.29 | 0.03 | -34.41 | 0.38 | -0.83 | 0.12 | 1.92 | 0.38 |
| GKF01_mount4_1102_grain-1@36 | 1102.6 | 2385985000 | -10.78 | 0.06 | -19.34 | 0.03 | -34.69 | 0.38 | -0.78 | 0.13 | 1.74 | 0.38 |
| GKF01_mount4_1102_grain-1@37 | 1102.6 | 2393396000 | -11.59 | 0.04 | -20.75 | 0.03 | -37.16 | 0.25 | -0.85 | 0.09 | 1.89 | 0.25 |
| GKF01_mount4_1102_grain-1@38 | 1102.6 | 2364168000 | -10.08 | 0.04 | -18.09 | 0.02 | -32.29 | 0.26 | -0.73 | 0.09 | 1.80 | 0.26 |
| GKF01_mount4_1102_grain-1@39 | 1102.6 | 2341595000 | -9.87  | 0.04 | -17.90 | 0.02 | -32.04 | 0.26 | -0.62 | 0.09 | 1.68 | 0.26 |
| GKF01_mount4_1102_grain-1@40 | 1102.6 | 1877470000 | -7.65  | 0.05 | -14.18 | 0.03 | -26.20 | 0.29 | -0.33 | 0.11 | 0.56 | 0.29 |
| GKF01_mount4_1102_grain-1@41 | 1102.6 | 2390650000 | -11.46 | 0.05 | -20.45 | 0.02 | -36.53 | 0.26 | -0.88 | 0.09 | 1.97 | 0.26 |
| GKF01_mount4_1102_grain-1@42 | 1102.6 | 2387356000 | -11.23 | 0.05 | -19.97 | 0.02 | -35.39 | 0.26 | -0.90 | 0.09 | 2.20 | 0.26 |
| GKF01_mount4_1102_grain-1@43 | 1102.6 | 2379639000 | -8.56  | 0.04 | -15.36 | 0.02 | -27.57 | 0.26 | -0.62 | 0.08 | 1.42 | 0.26 |
| GKF01_mount4_1102_grain-1@44 | 1102.6 | 2377866000 | -7.33  | 0.05 | -13.43 | 0.04 | -24.09 | 0.27 | -0.39 | 0.10 | 1.28 | 0.27 |
| GKF01_mount4_1102_grain-1@45 | 1102.6 | 2412813000 | -11.48 | 0.05 | -20.50 | 0.02 | -36.68 | 0.32 | -0.87 | 0.10 | 1.91 | 0.32 |
| GKF01_mount4_1102_grain-1@46 | 1102.6 | 2380800000 | -11.34 | 0.04 | -20.28 | 0.02 | -36.39 | 0.30 | -0.85 | 0.09 | 1.79 | 0.30 |
| GKF01_mount4_1102_grain-1@47 | 1102.6 | 2372241000 | -11.45 | 0.05 | -20.48 | 0.02 | -36.75 | 0.29 | -0.85 | 0.10 | 1.80 | 0.29 |
| GKF01_mount4_1102_grain-1@48 | 1102.6 | 2373475000 | -11.03 | 0.05 | -19.46 | 0.02 | -34.62 | 0.31 | -0.96 | 0.10 | 2.02 | 0.31 |
| GKF01_mount4_1102_grain-1@49 | 1102.6 | 2375863000 | -11.32 | 0.05 | -20.41 | 0.03 | -36.45 | 0.28 | -0.75 | 0.10 | 1.98 | 0.28 |
| GKF01_mount4_1102_grain-1@50 | 1102.6 | 2246487000 | -11.20 | 0.04 | -20.39 | 0.02 | -36.89 | 0.29 | -0.65 | 0.08 | 1.49 | 0.29 |
| GKF01_mount4_1102_grain-1@51 | 1102.6 | 2368179000 | -11.10 | 0.04 | -19.91 | 0.02 | -35.65 | 0.29 | -0.80 | 0.08 | 1.84 | 0.29 |
| GKF01_mount4_1102_grain-1@52 | 1102.6 | 2408386000 | -10.97 | 0.04 | -19.53 | 0.02 | -34.92 | 0.29 | -0.86 | 0.08 | 1.85 | 0.29 |
| GKF01_mount4_1102_grain-1@53 | 1102.6 | 2383108000 | -11.45 | 0.05 | -20.32 | 0.02 | -36.48 | 0.29 | -0.93 | 0.09 | 1.78 | 0.29 |
| GKF01_mount4_1102_grain-1@54 | 1102.6 | 2340803000 | -11.21 | 0.04 | -20.16 | 0.03 | -36.21 | 0.32 | -0.78 | 0.09 | 1.75 | 0.32 |
| GKF01_mount4_1102_grain-1@55 | 1102.6 | 2352265000 | -10.26 | 0.05 | -18.33 | 0.03 | -32.94 | 0.25 | -0.78 | 0.11 | 1.60 | 0.25 |
| GKF01_mount4_1102_grain-1@56 | 1102.6 | 2291214000 | -11.07 | 0.05 | -19.93 | 0.03 | -35.67 | 0.26 | -0.76 | 0.11 | 1.86 | 0.26 |
| GKF01_mount4_1102_grain-1@57 | 1102.6 | 2315253000 | -10.88 | 0.05 | -19.71 | 0.03 | -35.50 | 0.28 | -0.68 | 0.11 | 1.62 | 0.28 |

|                              |        |            |        |      |        |      |        |      |       |      |        |      |
|------------------------------|--------|------------|--------|------|--------|------|--------|------|-------|------|--------|------|
| GKF01_mount4_1102_grain-1@58 | 1102.6 | 2305121000 | -11.35 | 0.05 | -20.39 | 0.03 | -36.54 | 0.26 | -0.80 | 0.10 | 1.85   | 0.26 |
| GKF01_mount4_1102_grain-1@59 | 1102.6 | 2321738000 | -11.05 | 0.05 | -19.55 | 0.03 | -34.84 | 0.29 | -0.94 | 0.10 | 1.98   | 0.29 |
| GKF01_mount4_1102_grain-1@60 | 1102.6 | 2196690000 | -10.71 | 0.06 | -19.54 | 0.03 | -35.03 | 0.26 | -0.60 | 0.12 | 1.76   | 0.26 |
| GKF01_mount4_1102_grain-1@61 | 1102.6 | 2300355000 | -11.29 | 0.05 | -20.26 | 0.03 | -36.51 | 0.28 | -0.80 | 0.11 | 1.63   | 0.28 |
| GKF01_mount4_1102_grain-1@62 | 1102.6 | 2293968000 | -9.83  | 0.05 | -17.67 | 0.05 | -31.49 | 0.29 | -0.69 | 0.11 | 1.82   | 0.29 |
| GKF01_mount4_1102_grain-1@63 | 1102.6 | 2295426000 | -11.37 | 0.05 | -20.40 | 0.03 | -36.44 | 0.26 | -0.81 | 0.10 | 1.96   | 0.26 |
| GKF01_mount4_1102_grain-1@64 | 1102.6 | 2252573000 | -10.26 | 0.04 | -18.50 | 0.03 | -33.31 | 0.28 | -0.69 | 0.09 | 1.56   | 0.28 |
| GKF01_mount4_1102_grain-1@65 | 1102.6 | 2281039000 | -10.29 | 0.05 | -18.53 | 0.05 | -33.81 | 0.30 | -0.71 | 0.11 | 1.10   | 0.30 |
| GKF01_mount4_1102_grain-1@66 | 1102.6 | 2271183000 | -10.65 | 0.05 | -19.06 | 0.03 | -34.62 | 0.26 | -0.79 | 0.10 | 1.27   | 0.26 |
| GKF01_mount4_1102_grain-1@67 | 1102.6 | 2285080000 | -9.17  | 0.05 | -16.42 | 0.03 | -29.54 | 0.26 | -0.67 | 0.10 | 1.44   | 0.26 |
| GKF01_mount4_1102_grain-1@68 | 1102.6 | 2286142000 | -11.33 | 0.05 | -20.34 | 0.03 | -36.40 | 0.26 | -0.80 | 0.11 | 1.89   | 0.26 |
| GKF01_mount4_1102_grain-1@69 | 1102.6 | 2243309000 | -10.78 | 0.04 | -19.53 | 0.03 | -35.06 | 0.26 | -0.68 | 0.09 | 1.72   | 0.26 |
| GKF01_mount4_1102_grain-1@70 | 1102.6 | 2267255000 | -10.53 | 0.05 | -19.25 | 0.03 | -34.47 | 0.26 | -0.57 | 0.10 | 1.78   | 0.26 |
| GKF01_mount4_1102_grain-1@71 | 1102.6 | 2258896000 | -10.68 | 0.05 | -19.07 | 0.03 | -34.01 | 0.26 | -0.81 | 0.11 | 1.91   | 0.26 |
| GKF01_mount4_1102_grain-1@72 | 1102.6 | 2323116000 | -11.62 | 0.05 | -20.65 | 0.03 | -36.82 | 0.25 | -0.93 | 0.11 | 2.05   | 0.25 |
| GKF01_mount4_1102_grain-1@73 | 1102.6 | 2259448000 | -10.40 | 0.05 | -18.71 | 0.04 | -33.64 | 0.37 | -0.72 | 0.11 | 1.60   | 0.37 |
| #4@1                         | 1102.6 | 2119875000 | 11.73  | 0.05 | 11.86  | 0.02 | 16.44  | 0.30 | 5.64  | 0.10 | -6.21  | 0.30 |
| #4@2                         | 1102.6 | 2116908000 | 11.69  | 0.05 | 11.79  | 0.02 | 16.31  | 0.32 | 5.63  | 0.10 | -6.21  | 0.32 |
| #4@3                         | 1102.6 | 2229564000 | 17.42  | 0.04 | 17.12  | 0.02 | 22.67  | 0.29 | 8.64  | 0.09 | -10.10 | 0.29 |
| #4@4                         | 1102.6 | 2212191000 | 17.49  | 0.04 | 16.97  | 0.02 | 22.19  | 0.31 | 8.79  | 0.09 | -10.31 | 0.31 |
| #4@5                         | 1102.6 | 2197442000 | 14.32  | 0.08 | 12.54  | 0.10 | 15.01  | 0.30 | 7.88  | 0.19 | -8.94  | 0.30 |
| #4@6                         | 1102.6 | 2136730000 | 15.80  | 0.06 | 15.46  | 0.02 | 20.52  | 0.31 | 7.87  | 0.11 | -9.06  | 0.31 |
| #4@7                         | 1102.6 | 2163757000 | 13.69  | 0.05 | 14.21  | 0.02 | 19.96  | 0.30 | 6.40  | 0.10 | -7.22  | 0.30 |
| #4@8                         | 1102.6 | 2217181000 | 14.09  | 0.05 | 14.48  | 0.02 | 20.37  | 0.31 | 6.66  | 0.11 | -7.32  | 0.31 |
| #4@9                         | 1102.6 | 2203912000 | 14.94  | 0.05 | 15.16  | 0.02 | 20.95  | 0.29 | 7.16  | 0.10 | -8.04  | 0.29 |
| #4@10                        | 1102.6 | 2142070000 | 20.97  | 0.05 | 21.58  | 0.02 | 29.13  | 0.29 | 9.91  | 0.10 | -12.27 | 0.29 |
| #4@11                        | 1102.6 | 2220116000 | 13.80  | 0.04 | 13.78  | 0.02 | 18.63  | 0.30 | 6.73  | 0.09 | -7.71  | 0.30 |
| #4@12                        | 1102.6 | 2186260000 | 13.85  | 0.05 | 13.77  | 0.02 | 18.71  | 0.30 | 6.78  | 0.10 | -7.61  | 0.30 |
| #4@13                        | 1102.6 | 2057763000 | 15.54  | 0.07 | 14.64  | 0.07 | 18.69  | 0.33 | 8.02  | 0.16 | -9.32  | 0.33 |
| #4@14                        | 1102.6 | 2168764000 | 16.23  | 0.05 | 14.75  | 0.03 | 17.98  | 0.29 | 8.66  | 0.10 | -10.24 | 0.29 |



|                              |        |            |       |      |       |      |       |      |      |      |        |      |  |
|------------------------------|--------|------------|-------|------|-------|------|-------|------|------|------|--------|------|--|
| #4-37@3                      | 1102.6 |            |       |      |       |      |       |      |      |      |        |      |  |
| #4-38@1                      | 1102.6 | 2092897667 | 11.43 | 0.12 | 7.80  | 0.30 | 7.13  | 0.80 | 7.42 | 0.04 | -7.75  | 0.56 |  |
| #4-38@2                      | 1102.6 |            |       |      |       |      |       |      |      |      |        |      |  |
| #4-38@3                      | 1102.6 |            |       |      |       |      |       |      |      |      |        |      |  |
| #4-39@1                      | 1102.6 | 2033232000 | 18.04 | 1.80 | 17.70 | 2.49 | 23.43 | 3.92 | 8.96 | 0.53 | -10.47 | 0.96 |  |
| #4-39@2                      | 1102.6 |            |       |      |       |      |       |      |      |      |        |      |  |
| #4-39@3                      | 1102.6 |            |       |      |       |      |       |      |      |      |        |      |  |
| #4-40@1                      | 1102.6 | 2065271667 | 17.36 | 1.74 | 17.59 | 1.70 | 23.97 | 2.50 | 8.34 | 0.88 | -9.72  | 0.90 |  |
| #4-40@2                      | 1102.6 |            |       |      |       |      |       |      |      |      |        |      |  |
| #4-40@3                      | 1102.6 |            |       |      |       |      |       |      |      |      |        |      |  |
| GKF01_mount4_1102_grain-3@1  | 1102.6 | 2066198000 | 12.85 | 0.06 | 13.16 | 0.04 | 19.20 | 0.28 | 6.09 | 0.06 | -5.96  | 0.28 |  |
| GKF01_mount4_1102_grain-3@2  | 1102.6 | 2075451000 | 13.17 | 0.07 | 13.38 | 0.04 | 19.42 | 0.27 | 6.30 | 0.07 | -6.16  | 0.27 |  |
| GKF01_mount4_1102_grain-3@3  | 1102.6 | 2078350000 | 13.56 | 0.06 | 13.47 | 0.04 | 19.54 | 0.31 | 6.64 | 0.06 | -6.21  | 0.31 |  |
| GKF01_mount4_1102_grain-3@4  | 1102.6 | 2086657000 | 13.60 | 0.06 | 13.51 | 0.04 | 19.25 | 0.31 | 6.66 | 0.07 | -6.58  | 0.31 |  |
| GKF01_mount4_1102_grain-3@5  | 1102.6 | 2040383000 | 13.40 | 0.06 | 13.36 | 0.04 | 18.95 | 0.29 | 6.55 | 0.06 | -6.59  | 0.29 |  |
| GKF01_mount4_1102_grain-3@7  | 1102.6 | 2097557000 | 13.41 | 0.06 | 13.23 | 0.04 | 18.52 | 0.32 | 6.62 | 0.07 | -6.76  | 0.32 |  |
| GKF01_mount4_1102_grain-3@8  | 1102.6 | 2113695000 | 13.64 | 0.06 | 13.61 | 0.04 | 19.31 | 0.27 | 6.65 | 0.07 | -6.72  | 0.27 |  |
| GKF01_mount4_1102_grain-3@9  | 1102.6 | 2114464000 | 13.31 | 0.06 | 13.42 | 0.04 | 19.27 | 0.30 | 6.43 | 0.06 | -6.38  | 0.30 |  |
| GKF01_mount4_1102_grain-3@10 | 1102.6 | 2122712000 | 13.80 | 0.06 | 14.25 | 0.04 | 20.87 | 0.27 | 6.49 | 0.06 | -6.37  | 0.27 |  |
| GKF01_mount4_1102_grain-3@11 | 1102.6 | 2087238000 | 17.13 | 0.07 | 17.42 | 0.04 | 24.66 | 0.27 | 8.19 | 0.07 | -8.71  | 0.27 |  |
| GKF01_mount4_1102_grain-3@12 | 1102.6 | 2082777000 | 14.02 | 0.07 | 14.13 | 0.04 | 20.15 | 0.27 | 6.77 | 0.07 | -6.86  | 0.27 |  |
| GKF01_mount4_1102_grain-3@13 | 1102.6 | 2087940000 | 13.87 | 0.07 | 13.81 | 0.04 | 19.94 | 0.27 | 6.78 | 0.07 | -6.46  | 0.27 |  |
| GKF01_mount4_1102_grain-3@14 | 1102.6 | 2101860000 | 13.80 | 0.06 | 13.85 | 0.04 | 19.95 | 0.27 | 6.69 | 0.07 | -6.53  | 0.27 |  |
| GKF01_mount4_1102_grain-3@15 | 1102.6 | 2140811000 | 13.59 | 0.06 | 13.64 | 0.04 | 19.46 | 0.27 | 6.59 | 0.06 | -6.62  | 0.27 |  |
| GKF01_mount4_1102_grain-3@16 | 1102.6 | 2171254000 | 13.40 | 0.06 | 13.38 | 0.04 | 19.09 | 0.27 | 6.53 | 0.06 | -6.48  | 0.27 |  |
| GKF01_mount4_1102_grain-3@17 | 1102.6 | 2175148000 | 13.04 | 0.07 | 13.22 | 0.04 | 19.05 | 0.29 | 6.25 | 0.07 | -6.22  | 0.29 |  |
| GKF01_mount4_1102_grain-3@18 | 1102.6 | 2188712000 | 13.60 | 0.07 | 13.57 | 0.04 | 19.60 | 0.34 | 6.63 | 0.07 | -6.34  | 0.34 |  |
| GKF01_mount4_1102_grain-3@19 | 1102.6 | 2202654000 | 13.75 | 0.07 | 13.81 | 0.04 | 19.99 | 0.27 | 6.66 | 0.07 | -6.41  | 0.27 |  |
| GKF01_mount4_1102_grain-3@20 | 1102.6 | 1999281000 | 18.08 | 0.06 | 17.80 | 0.04 | 23.32 | 0.29 | 8.95 | 0.07 | -10.78 | 0.29 |  |
| GKF01_mount4_1102_grain-3@21 | 1102.6 | 2079303000 | 13.84 | 0.07 | 14.03 | 0.04 | 19.25 | 0.33 | 6.64 | 0.07 | -7.57  | 0.33 |  |

|                              |        |             |       |      |       |      |       |       |      |      |       |      |
|------------------------------|--------|-------------|-------|------|-------|------|-------|-------|------|------|-------|------|
| GKF01_mount4_1102_grain-3@22 | 1102.6 | 2031845000  | 13.94 | 0.07 | 13.80 | 0.04 | 19.03 | 0.29  | 6.86 | 0.07 | -7.36 | 0.29 |
| GKF01_mount4_1102_grain-3@23 | 1102.6 | 2010229000  | 13.76 | 0.07 | 14.28 | 0.04 | 20.58 | 0.29  | 6.43 | 0.07 | -6.73 | 0.29 |
| GKF01_mount4_1102_grain-3@24 | 1102.6 | 1971436000  | 13.94 | 0.07 | 14.06 | 0.04 | 19.47 | 0.32  | 6.73 | 0.07 | -7.41 | 0.32 |
| GKF01_mount4_1102_grain-3@25 | 1102.6 | 1932960000  | 13.03 | 0.07 | 13.14 | 0.04 | 18.05 | 0.29  | 6.29 | 0.07 | -7.06 | 0.29 |
| GKF01_mount4_1102_grain-3@26 | 1102.6 | 1990914000  | 13.78 | 0.07 | 13.81 | 0.04 | 19.22 | 0.29  | 6.70 | 0.07 | -7.18 | 0.29 |
| GKF01_mount4_1102_grain-3@27 | 1102.6 | 2031901000  | 13.65 | 0.06 | 14.26 | 0.04 | 20.08 | 0.29  | 6.33 | 0.07 | -7.19 | 0.29 |
| GKF01_mount4_1102_grain-3@28 | 1102.6 | 2034031000  | 13.67 | 0.07 | 14.33 | 0.04 | 20.58 | 0.28  | 6.31 | 0.07 | -6.83 | 0.28 |
| GKF01_mount4_1102_grain-3@27 | 1102.6 | 2031901000  | 13.65 | 0.06 | 14.26 | 0.04 | 20.09 | 0.29  | 6.33 | 0.07 | -7.18 | 0.29 |
| GKF01_mount4_1102_grain-3@28 | 1102.6 | 2034031000  | 13.67 | 0.07 | 14.33 | 0.04 | 20.59 | 0.28  | 6.31 | 0.07 | -6.82 | 0.28 |
| GKF01_mount4_1102_grain-3@29 | 1102.6 | 2012551000  | 13.67 | 0.07 | 14.10 | 0.04 | 19.86 | 0.29  | 6.43 | 0.07 | -7.10 | 0.29 |
| GKF01_mount4_1102_grain-3@30 | 1102.6 | 1997552000  | 13.81 | 0.06 | 13.77 | 0.04 | 19.14 | 0.28  | 6.75 | 0.07 | -7.18 | 0.28 |
| GKF01_mount4_1102_grain-3@33 | 1102.6 | 1993133000  | 13.35 | 0.06 | 13.60 | 0.04 | 19.25 | 0.28  | 6.37 | 0.07 | -6.75 | 0.28 |
| GKF01_mount4_1102_grain-3@34 | 1102.6 | 2000236000  | 13.77 | 0.06 | 13.72 | 0.04 | 19.08 | 0.30  | 6.73 | 0.07 | -7.15 | 0.30 |
| GKF01_mount4_1102_grain-3@35 | 1102.6 | 2007329000  | 13.79 | 0.07 | 13.93 | 0.04 | 19.25 | 0.28  | 6.65 | 0.07 | -7.37 | 0.28 |
| GKF01_mount4_1102_grain-3@36 | 1102.6 | 1923773000  | 13.53 | 0.06 | 13.68 | 0.04 | 18.84 | 0.29  | 6.51 | 0.06 | -7.30 | 0.29 |
| GKF01_mount4_1102_grain-3@37 | 1102.6 | 1990494000  | 13.76 | 0.07 | 14.08 | 0.04 | 19.65 | 0.28  | 6.53 | 0.07 | -7.27 | 0.28 |
| GKF01_mount4_1102_grain-3@38 | 1102.6 | 1979141000  | 13.77 | 0.06 | 13.82 | 0.04 | 18.62 | 0.32  | 6.68 | 0.07 | -7.79 | 0.32 |
| #2-1@1                       | 835.6  | 1565766333  | 10.56 | 2.40 | 7.93  | 3.96 | 6.64  | 8.27  | 6.48 | 0.39 | -8.49 | 0.76 |
| #2-1@2                       | 835.6  |             |       |      |       |      |       |       |      |      |       |      |
| #2-1@3                       | 835.6  |             |       |      |       |      |       |       |      |      |       |      |
| #2-2@1                       | 835.6  | 1617822333  | 9.57  | 0.77 | 6.03  | 1.38 | 2.78  | 2.83  | 6.47 | 0.06 | -8.72 | 0.99 |
| #2-2@2                       | 835.6  |             |       |      |       |      |       |       |      |      |       |      |
| #2-2@3                       | 835.6  |             |       |      |       |      |       |       |      |      |       |      |
| #2-3@1                       | 835.6  | 563591700   | 10.85 | 3.61 | 7.98  | 6.56 | 5.70  | 12.62 | 6.75 | 0.53 | -9.51 | 0.99 |
| #2-3@2                       | 835.6  |             |       |      |       |      |       |       |      |      |       |      |
| #2-3@3                       | 835.6  |             |       |      |       |      |       |       |      |      |       |      |
| #2-5@1                       | 835.6  | 118108066.7 | 9.02  | 3.22 | 7.82  | 6.53 | 7.43  | 13.52 | 5.00 | 0.27 | -7.49 | 1.12 |
| #2-5@2                       | 835.6  |             |       |      |       |      |       |       |      |      |       |      |
| #2-5@3                       | 835.6  |             |       |      |       |      |       |       |      |      |       |      |
| #2-6@1                       | 835.6  | 813228933.3 | 10.93 | 3.93 | 8.37  | 7.17 | 7.27  | 14.41 | 6.63 | 0.31 | -8.71 | 0.71 |



|         |        |             |       |      |       |      |       |       |      |      |       |      |  |
|---------|--------|-------------|-------|------|-------|------|-------|-------|------|------|-------|------|--|
| #2-6@2  | 835.6  |             |       |      |       |      |       |       |      |      |       |      |  |
| #2-6@3  | 835.6  |             |       |      |       |      |       |       |      |      |       |      |  |
| #2-8@1  | 835.6  | 102820206.7 | 10.67 | 5.70 | 8.76  | 7.57 | 8.12  | 18.03 | 6.17 | 2.20 | -8.59 | 3.57 |  |
| #2-8@2  | 835.6  |             |       |      |       |      |       |       |      |      |       |      |  |
| #2-8@3  | 835.6  |             |       |      |       |      |       |       |      |      |       |      |  |
| #2-9@1  | 1404.6 | 1571561000  | 14.00 | 0.43 | 13.96 | 0.76 | 18.66 | 1.22  | 6.84 | 0.13 | -8.03 | 0.52 |  |
| #2-9@2  | 1404.6 |             |       |      |       |      |       |       |      |      |       |      |  |
| #2-9@3  | 1404.6 |             |       |      |       |      |       |       |      |      |       |      |  |
| #2-10@1 | 1404.6 | 1684061000  | 14.30 | 0.37 | 14.19 | 0.49 | 18.97 | 1.27  | 7.02 | 0.19 | -8.16 | 0.39 |  |
| #2-10@2 | 1404.6 |             |       |      |       |      |       |       |      |      |       |      |  |
| #2-10@3 | 1404.6 |             |       |      |       |      |       |       |      |      |       |      |  |
| #2-11@1 | 1404.6 | 381081566.7 | 14.15 | 3.19 | 14.36 | 5.64 | 19.33 | 12.11 | 6.79 | 0.58 | -8.13 | 1.37 |  |
| #2-11@2 | 1404.6 |             |       |      |       |      |       |       |      |      |       |      |  |
| #2-11@3 | 1404.6 |             |       |      |       |      |       |       |      |      |       |      |  |
| #2-12@1 | 1404.6 | 1465842333  | 13.80 | 0.14 | 13.45 | 0.05 | 18.01 | 0.07  | 6.89 | 0.12 | -7.70 | 0.16 |  |
| #2-12@2 | 1404.6 |             |       |      |       |      |       |       |      |      |       |      |  |
| #2-12@3 | 1404.6 |             |       |      |       |      |       |       |      |      |       |      |  |
| #2-13@1 | 1404.6 | 1077736900  | 13.13 | 1.07 | 12.40 | 1.61 | 16.05 | 2.02  | 6.76 | 0.25 | -7.65 | 1.22 |  |
| #2-13@2 | 1404.6 |             |       |      |       |      |       |       |      |      |       |      |  |
| #2-13@3 | 1404.6 |             |       |      |       |      |       |       |      |      |       |      |  |
| #2-14@1 | 1404.6 | 1656253667  | 13.82 | 0.68 | 13.66 | 1.39 | 18.06 | 3.31  | 6.81 | 0.05 | -8.06 | 1.47 |  |
| #2-14@2 | 1404.6 |             |       |      |       |      |       |       |      |      |       |      |  |
| #2-14@3 | 1404.6 |             |       |      |       |      |       |       |      |      |       |      |  |
| #2-15@1 | 1404.6 | 1269876333  | 6.58  | 4.44 | 5.85  | 4.76 | 7.04  | 6.69  | 3.57 | 2.15 | -4.10 | 2.63 |  |
| #2-15@2 | 1404.6 |             |       |      |       |      |       |       |      |      |       |      |  |
| #2-15@3 | 1404.6 |             |       |      |       |      |       |       |      |      |       |      |  |
| #1-1@1  | 729.7  | 2155994000  | 3.19  | 2.75 | 0.68  | 1.60 | -0.59 | 0.52  | 2.84 | 1.93 | -1.88 | 2.53 |  |
| #1-1@2  | 729.7  |             |       |      |       |      |       |       |      |      |       |      |  |
| #1-1@3  | 729.7  |             |       |      |       |      |       |       |      |      |       |      |  |
| #1-3@1  | 729.7  | 2043719667  | 7.26  | 0.59 | 3.42  | 0.90 | 1.88  | 1.94  | 5.50 | 0.13 | -4.63 | 0.29 |  |

|         |       |            |       |      |       |      |       |      |      |      |       |      |  |
|---------|-------|------------|-------|------|-------|------|-------|------|------|------|-------|------|--|
| #1-3@2  | 729.7 |            |       |      |       |      |       |      |      |      |       |      |  |
| #1-3@3  | 729.7 |            |       |      |       |      |       |      |      |      |       |      |  |
| #1-4@1  | 729.7 | 2114354000 | 6.68  | 0.91 | 0.22  | 1.84 | -5.84 | 3.46 | 6.56 | 0.40 | -6.27 | 0.51 |  |
| #1-4@2  | 729.7 |            |       |      |       |      |       |      |      |      |       |      |  |
| #1-4@3  | 729.7 |            |       |      |       |      |       |      |      |      |       |      |  |
| #1-5@1  | 729.7 | 2138819333 | 5.18  | 1.76 | -1.20 | 1.73 | -7.45 | 2.46 | 5.80 | 0.92 | -5.17 | 0.87 |  |
| #1-5@2  | 729.7 |            |       |      |       |      |       |      |      |      |       |      |  |
| #1-5@3  | 729.7 |            |       |      |       |      |       |      |      |      |       |      |  |
| #1-6@1  | 729.7 | 2178885000 | 7.34  | 1.78 | 1.74  | 3.50 | -2.02 | 6.59 | 6.44 | 0.35 | -5.34 | 0.08 |  |
| #1-6@2  | 729.7 |            |       |      |       |      |       |      |      |      |       |      |  |
| #1-6@3  | 729.7 |            |       |      |       |      |       |      |      |      |       |      |  |
| #1-7@1  | 729.7 | 2125940333 | 10.76 | 2.40 | 9.88  | 3.06 | 11.73 | 4.13 | 5.68 | 0.84 | -7.12 | 1.75 |  |
| #1-7@2  | 729.7 |            |       |      |       |      |       |      |      |      |       |      |  |
| #1-7@3  | 729.7 |            |       |      |       |      |       |      |      |      |       |      |  |
| #1-8@1  | 729.7 | 2137545667 | 9.39  | 1.38 | 7.81  | 1.53 | 8.59  | 2.38 | 5.38 | 0.62 | -6.31 | 0.73 |  |
| #1-8@2  | 729.7 |            |       |      |       |      |       |      |      |      |       |      |  |
| #1-8@3  | 729.7 |            |       |      |       |      |       |      |      |      |       |      |  |
| #1-9@1  | 729.7 | 2077717000 | 11.77 | 1.75 | 15.39 | 1.37 | 25.18 | 4.54 | 3.87 | 1.80 | -4.27 | 3.34 |  |
| #1-9@2  | 729.7 |            |       |      |       |      |       |      |      |      |       |      |  |
| #1-9@3  | 729.7 |            |       |      |       |      |       |      |      |      |       |      |  |
| #1-10@1 | 729.7 | 2021985667 | 9.53  | 0.93 | 9.60  | 1.06 | 12.90 | 1.89 | 4.59 | 0.46 | -5.42 | 0.52 |  |
| #1-10@2 | 729.7 |            |       |      |       |      |       |      |      |      |       |      |  |
| #1-10@3 | 729.7 |            |       |      |       |      |       |      |      |      |       |      |  |
| #1-11@1 | 729.7 | 1949986000 | 7.51  | 1.18 | 2.68  | 3.47 | -0.88 | 6.76 | 6.13 | 0.61 | -5.98 | 0.89 |  |
| #1-11@2 | 729.7 |            |       |      |       |      |       |      |      |      |       |      |  |
| #1-11@3 | 729.7 |            |       |      |       |      |       |      |      |      |       |      |  |
| #1-12@1 | 729.7 | 1978165333 | 6.68  | 0.96 | 0.76  | 1.31 | -5.00 | 1.95 | 6.28 | 0.28 | -6.45 | 1.35 |  |
| #1-12@2 | 729.7 |            |       |      |       |      |       |      |      |      |       |      |  |
| #1-12@3 | 729.7 |            |       |      |       |      |       |      |      |      |       |      |  |
| #1-13@1 | 729.7 | 2025229000 | 9.64  | 0.55 | 4.56  | 1.54 | 1.63  | 4.10 | 7.30 | 1.32 | -7.04 | 1.90 |  |

|         |       |            |       |      |       |      |       |       |      |      |       |      |  |
|---------|-------|------------|-------|------|-------|------|-------|-------|------|------|-------|------|--|
| #1-13@2 | 729.7 |            |       |      |       |      |       |       |      |      |       |      |  |
| #1-13@3 | 729.7 |            |       |      |       |      |       |       |      |      |       |      |  |
| #1-14@1 | 729.7 | 1887643333 | 10.47 | 0.24 | 4.44  | 0.54 | 1.67  | 5.49  | 8.19 | 0.10 | -6.78 | 5.66 |  |
| #1-14@2 | 729.7 |            |       |      |       |      |       |       |      |      |       |      |  |
| #1-14@3 | 729.7 |            |       |      |       |      |       |       |      |      |       |      |  |
| #1-15@1 | 729.7 | 1987793667 | 6.05  | 0.64 | 0.30  | 0.87 | -6.01 | 2.38  | 5.90 | 0.26 | -6.57 | 2.26 |  |
| #1-15@2 | 729.7 |            |       |      |       |      |       |       |      |      |       |      |  |
| #1-15@3 | 729.7 |            |       |      |       |      |       |       |      |      |       |      |  |
| #1-16@1 | 729.7 | 1646501000 | 9.73  | 2.70 | 6.56  | 6.96 | 6.33  | 16.06 | 6.35 | 1.07 | -6.18 | 2.91 |  |
| #1-16@2 | 729.7 |            |       |      |       |      |       |       |      |      |       |      |  |
| #1-16@3 | 729.7 |            |       |      |       |      |       |       |      |      |       |      |  |
| #1-17@1 | 729.7 | 1936335000 | 8.40  | 0.58 | 5.32  | 2.83 | 4.87  | 5.22  | 5.67 | 0.88 | -5.26 | 0.59 |  |
| #1-17@2 | 729.7 |            |       |      |       |      |       |       |      |      |       |      |  |
| #1-17@3 | 729.7 |            |       |      |       |      |       |       |      |      |       |      |  |
| #1-18@1 | 829.5 | 1612664000 | 10.65 | 1.05 | 12.68 | 4.24 | 18.58 | 8.69  | 4.14 | 1.16 | -5.66 | 1.34 |  |
| #1-18@2 | 829.5 |            |       |      |       |      |       |       |      |      |       |      |  |
| #1-18@3 | 829.5 |            |       |      |       |      |       |       |      |      |       |      |  |
| #1-19@1 | 829.5 | 1961885000 | 7.63  | 1.59 | 11.38 | 3.43 | 19.64 | 6.96  | 1.79 | 0.24 | -2.09 | 0.57 |  |
| #1-19@2 | 829.5 |            |       |      |       |      |       |       |      |      |       |      |  |
| #1-19@3 | 829.5 |            |       |      |       |      |       |       |      |      |       |      |  |
| #1-20@1 | 829.5 | 1957171000 | 8.67  | 1.95 | 11.12 | 1.40 | 17.45 | 1.60  | 2.96 | 1.40 | -3.79 | 2.76 |  |
| #1-20@2 | 829.5 |            |       |      |       |      |       |       |      |      |       |      |  |
| #1-20@3 | 829.5 |            |       |      |       |      |       |       |      |      |       |      |  |
| #1@21   | 829.5 | 1868771667 | 10.15 | 1.53 | 9.87  | 1.75 | 11.97 | 2.33  | 5.08 | 0.64 | -6.86 | 1.10 |  |
| #1@22   | 829.5 |            |       |      |       |      |       |       |      |      |       |      |  |
| #1@23   | 829.5 |            |       |      |       |      |       |       |      |      |       |      |  |
| #1-22@1 | 829.5 | 1863819000 | 10.61 | 0.52 | 11.80 | 2.92 | 17.05 | 4.91  | 4.55 | 1.74 | -5.49 | 0.69 |  |
| #1-22@2 | 829.5 |            |       |      |       |      |       |       |      |      |       |      |  |
| #1-22@3 | 829.5 |            |       |      |       |      |       |       |      |      |       |      |  |
| #1-23@1 | 829.5 | 1847160333 | 11.66 | 2.33 | 11.01 | 3.73 | 12.64 | 6.53  | 6.01 | 0.43 | -8.39 | 1.36 |  |

|         |       |            |       |      |       |      |       |      |      |      |       |      |  |
|---------|-------|------------|-------|------|-------|------|-------|------|------|------|-------|------|--|
| #1-23@2 | 829.5 |            |       |      |       |      |       |      |      |      |       |      |  |
| #1-23@3 | 829.5 |            |       |      |       |      |       |      |      |      |       |      |  |
| #1-24@1 | 829.5 | 1791701667 | 12.01 | 2.69 | 11.96 | 2.22 | 15.75 | 3.08 | 5.87 | 1.57 | -7.10 | 1.87 |  |
| #1-24@2 | 829.5 |            |       |      |       |      |       |      |      |      |       |      |  |
| #1-24@3 | 829.5 |            |       |      |       |      |       |      |      |      |       |      |  |
| #1-25@1 | 829.5 | 1027854133 | 12.29 | 0.73 | 11.96 | 2.47 | 17.38 | 6.31 | 6.15 | 1.00 | -5.47 | 2.88 |  |
| #1-25@2 | 829.5 |            |       |      |       |      |       |      |      |      |       |      |  |
| #1-25@3 | 829.5 |            |       |      |       |      |       |      |      |      |       |      |  |
| #1-26@1 | 829.5 | 1850938667 | 13.62 | 1.59 | 11.89 | 2.16 | 14.40 | 4.47 | 7.51 | 1.00 | -8.31 | 1.89 |  |
| #1-26@2 | 829.5 |            |       |      |       |      |       |      |      |      |       |      |  |
| #1-26@3 | 829.5 |            |       |      |       |      |       |      |      |      |       |      |  |
| #1-27@1 | 829.5 | 1056680633 | 9.13  | 2.19 | 9.71  | 3.63 | 15.84 | 5.33 | 4.15 | 0.60 | -2.69 | 1.75 |  |
| #1-27@2 | 829.5 |            |       |      |       |      |       |      |      |      |       |      |  |
| #1-27@3 | 829.5 |            |       |      |       |      |       |      |      |      |       |      |  |
| #4-41@1 | 888.3 | 1983704000 | 12.74 | 3.21 | 6.75  | 3.21 | 3.74  | 5.26 | 9.27 | 1.58 | -9.14 | 1.08 |  |
| #4-41@2 | 888.3 |            |       |      |       |      |       |      |      |      |       |      |  |
| #4-41@3 | 888.3 |            |       |      |       |      |       |      |      |      |       |      |  |
| #4-42@1 | 888.3 | 1199003000 | 14.05 | 2.98 | 9.56  | 4.41 | 9.14  | 7.58 | 9.14 | 0.79 | -9.11 | 0.89 |  |
| #4-42@2 | 888.3 |            |       |      |       |      |       |      |      |      |       |      |  |
| #4-42@3 | 888.3 |            |       |      |       |      |       |      |      |      |       |      |  |
| #4-43@1 | 888.3 | 1969897333 | 9.30  | 1.46 | 3.16  | 1.29 | -1.39 | 1.47 | 7.67 | 0.84 | -7.41 | 1.79 |  |
| #4-43@2 | 888.3 |            |       |      |       |      |       |      |      |      |       |      |  |
| #4-43@3 | 888.3 |            |       |      |       |      |       |      |      |      |       |      |  |
| #4-44@1 | 888.3 | 1997747000 | 10.72 | 4.35 | 5.07  | 4.05 | 1.56  | 5.29 | 8.11 | 2.29 | -8.10 | 2.45 |  |
| #4-44@2 | 888.3 |            |       |      |       |      |       |      |      |      |       |      |  |
| #4-44@3 | 888.3 |            |       |      |       |      |       |      |      |      |       |      |  |
| #4-45@1 | 888.3 | 2013506000 | 10.72 | 2.95 | 4.89  | 3.52 | 1.09  | 5.77 | 8.21 | 1.15 | -8.22 | 0.96 |  |
| #4-45@2 | 888.3 |            |       |      |       |      |       |      |      |      |       |      |  |
| #4-45@3 | 888.3 |            |       |      |       |      |       |      |      |      |       |      |  |
| #4-46@1 | 888.3 | 1990103000 | 8.17  | 0.94 | 2.97  | 0.23 | -0.75 | 1.39 | 6.65 | 0.97 | -6.40 | 1.07 |  |

|                      |       |             |        |      |        |      |        |       |      |      |       |      |  |
|----------------------|-------|-------------|--------|------|--------|------|--------|-------|------|------|-------|------|--|
| #4-46@2              | 888.3 |             |        |      |        |      |        |       |      |      |       |      |  |
| #4-46@3              | 888.3 |             |        |      |        |      |        |       |      |      |       |      |  |
| #4-47@1              | 888.3 | 1901220000  | 11.29  | 3.43 | 5.91   | 3.60 | 3.02   | 5.32  | 8.25 | 1.63 | -8.24 | 1.56 |  |
| #4-47@2              | 888.3 |             |        |      |        |      |        |       |      |      |       |      |  |
| #4-47@3              | 888.3 |             |        |      |        |      |        |       |      |      |       |      |  |
| #4-48@1              | 888.3 | 2031578000  | 8.08   | 0.07 | 1.61   | 0.40 | -4.10  | 1.04  | 7.25 | 0.17 | -7.16 | 0.29 |  |
| #4-48@2              | 888.3 |             |        |      |        |      |        |       |      |      |       |      |  |
| #4-48@3              | 888.3 |             |        |      |        |      |        |       |      |      |       |      |  |
| #4-49@1              | 888.3 | 1615899000  | 12.27  | 3.67 | 7.52   | 5.86 | 6.23   | 10.28 | 8.40 | 0.76 | -8.12 | 0.93 |  |
| #4-49@2              | 888.3 |             |        |      |        |      |        |       |      |      |       |      |  |
| #4-49@3              | 888.3 |             |        |      |        |      |        |       |      |      |       |      |  |
| #4-50@1              | 888.3 | 779631366.7 | 11.27  | 3.46 | 9.42   | 7.47 | 12.48  | 14.56 | 6.43 | 0.76 | -5.51 | 0.77 |  |
| #4-50@2              | 888.3 |             |        |      |        |      |        |       |      |      |       |      |  |
| #4-50@3              | 888.3 |             |        |      |        |      |        |       |      |      |       |      |  |
| #4-51@1              | 888.3 | 1649828000  | 13.83  | 2.09 | 9.55   | 4.97 | 9.92   | 9.84  | 8.92 | 0.73 | -8.31 | 0.46 |  |
| #4-51@2              | 888.3 |             |        |      |        |      |        |       |      |      |       |      |  |
| #4-51@3              | 888.3 |             |        |      |        |      |        |       |      |      |       |      |  |
| #4-52@1 <sup>1</sup> | 888.3 | 2062617667  | -18.21 | 1.05 | -35.58 | 1.74 | -67.07 | 3.04  | 0.28 | 0.14 | -0.55 | 0.19 |  |
| #4-52@2 <sup>1</sup> | 888.3 |             |        |      |        |      |        |       |      |      |       |      |  |
| #4-52@3 <sup>1</sup> | 888.3 |             |        |      |        |      |        |       |      |      |       |      |  |
| #4-53@1 <sup>1</sup> | 888.3 | 1765439333  | -18.34 | 0.78 | -35.79 | 1.14 | -66.91 | 2.07  | 0.26 | 0.18 | -0.01 | 0.36 |  |
| #4-53@2 <sup>1</sup> | 888.3 |             |        |      |        |      |        |       |      |      |       |      |  |
| #4-53@3 <sup>1</sup> | 888.3 |             |        |      |        |      |        |       |      |      |       |      |  |
| #4-55@1 <sup>1</sup> | 888.3 | 1996604667  | -18.10 | 0.48 | -35.27 | 1.10 | -66.38 | 2.24  | 0.22 | 0.09 | -0.43 | 0.84 |  |
| #4-55@2 <sup>1</sup> | 888.3 |             |        |      |        |      |        |       |      |      |       |      |  |
| #4-55@3 <sup>1</sup> | 888.3 |             |        |      |        |      |        |       |      |      |       |      |  |
| #4-56@1 <sup>1</sup> | 888.3 | 2050612000  | -18.21 | 0.26 | -35.48 | 0.52 | -66.77 | 1.09  | 0.22 | 0.01 | -0.43 | 0.51 |  |
| #4-56@2 <sup>1</sup> | 888.3 |             |        |      |        |      |        |       |      |      |       |      |  |
| #4-56@3 <sup>1</sup> | 888.3 |             |        |      |        |      |        |       |      |      |       |      |  |

252

253

254 Table S4 SF<sub>6</sub> data for splits of same samples analyzed by SIMS.

| Depth                            | $\delta^{34}\text{S}$ | $\Delta^{33}\text{S}$ | $\Delta^{36}\text{S}$ |
|----------------------------------|-----------------------|-----------------------|-----------------------|
| 1102.6 Ovoid                     | -18.60                | -0.64                 | 1.17                  |
| 1102.6 Disseminated <sup>1</sup> | 12.02                 | 6.61                  | <b>-6.68</b>          |
| 1404.6                           | 11.88                 | 4.18                  | -5.31                 |
| 729.7                            | 3.48                  | 4.92                  | -4.59                 |
| 829.5                            | 11.44                 | 4.79                  | -6.12                 |
| 835.6                            | 10.00                 | 5.54                  | -8.07                 |
| 888.3                            | 2.71                  | 6.81                  | -6.81                 |

255 1small (1  $\mu\text{mol}$ ) sample,  $\Delta^{36}\text{S}$  uncertainty for this sample likely >1 ‰.
